# Supplementary material for: Prevalence and determinants of hyperglycaemia among adults in Bangladesh: results from a population-based national survey
Source: PubMed Central journal article supplement (PMC6661587; doi:10.1136/bmjopen-2019-029674), 2019-07-24
Supplement: bmjopen-2019-029674.draft_revisions.pdf [file bmjopen-2019-029674.draft_revisions.pdf]

# BMJ Open

BMJ Open is committed to open peer review. As part of this commitment we make the peer review history of every article we publish publicly available.

When an article is published we post the peer reviewers' comments and the authors' responses online. We also post the versions of the paper that were used during peer review. These are the versions that the peer review comments apply to.

The versions of the paper that follow are the versions that were submitted during the peer review process. They are not the versions of record or the final published versions. They should not be cited or distributed as the published version of this manuscript.

BMJ Open is an open access journal and the full, final, typeset and author-corrected version of record of the manuscript is available on our site with no access controls, subscription charges or pay-per-view fees (<http://bmjopen.bmj.com>).

If you have any questions on BMJ Open's open peer review process please email [info.bmjopen@bmj.com](mailto:info.bmjopen@bmj.com)

# BMJ Open

## Prevalence and determinants of raised blood glucose among adults in Bangladesh: results from a population-based national survey

|                               |                                                                                                                                                                                                                                                                                                                                                                                                                                                                                                                                          |
|-------------------------------|------------------------------------------------------------------------------------------------------------------------------------------------------------------------------------------------------------------------------------------------------------------------------------------------------------------------------------------------------------------------------------------------------------------------------------------------------------------------------------------------------------------------------------------|
| Journal:                      | <i>BMJ Open</i>                                                                                                                                                                                                                                                                                                                                                                                                                                                                                                                          |
| Manuscript ID                 | bmjopen-2019-029674                                                                                                                                                                                                                                                                                                                                                                                                                                                                                                                      |
| Article Type:                 | Research                                                                                                                                                                                                                                                                                                                                                                                                                                                                                                                                 |
| Date Submitted by the Author: | 05-Feb-2019                                                                                                                                                                                                                                                                                                                                                                                                                                                                                                                              |
| Complete List of Authors:     | Islam, Jessica; World Health Organization Country Office for Bangladesh, ; University of North Carolina at Chapel Hill Gillings School of Global Public Health, Department of Epidemiology<br>Zaman, MM; World Health Organization, Dhaka, Bangladesh,<br>Bhuiyan, Mahfuz; World Health Organization Country Office for Bangladesh<br>Haq, Syed; Bangabandhu Sheikh Mujib Medical University, Rheumatology<br>Ahmed, Shamim; Bangabandhu Sheikh Mujib Medical University<br>Al-Qadir, Zahid; Bangabandhu Sheikh Mujib Medical University |
| Keywords:                     | non-communicable diseases, chronic disease, raised blood glucose, Bangladesh                                                                                                                                                                                                                                                                                                                                                                                                                                                             |
|                               |                                                                                                                                                                                                                                                                                                                                                                                                                                                                                                                                          |

SCHOLARONE™  
Manuscripts

1  
2  
3 1 Prevalence and determinants of raised blood glucose among adults in Bangladesh: results from  
4  
5 2  
6 a population-based national survey  
7

8 3 Jessica Y. Islam<sup>1,2</sup>, M. Mostafa Zaman<sup>\*2</sup>, Mahfuzur Rahman Bhuiyan<sup>2</sup>, Syed Atiqul Haq<sup>3</sup>,  
9  
10 4 Shamim Ahmed<sup>3</sup>, Zahid- Al- Quadir<sup>3</sup>  
11

12  
13 5 <sup>1</sup>Department of Epidemiology, UNC Gillings School of Global Public Health, Chapel Hill, NC;  
14  
15 6 Email: [islamjy@email.unc.edu](mailto:islamjy@email.unc.edu)  
16

17  
18 7 <sup>2</sup>World Health Organization, Dhaka, Bangladesh; Email: [zamanm@who.int](mailto:zamanm@who.int); Email:  
19  
20 8 [mahfuzdoc@gmail.com](mailto:mahfuzdoc@gmail.com)  
21

22  
23 9 <sup>3</sup>Department of Rheumatology, Bangabandhu Sheikh Mujib Medical University, Shahbag,  
24  
25 10 Dhaka, Bangladesh. Email: [haqsyedatiqul@gmail.com](mailto:haqsyedatiqul@gmail.com); Email: [dr\\_shamim\\_ahmed@yahoo.com](mailto:dr_shamim_ahmed@yahoo.com);  
26  
27 11 Email: [drzahid1981@yahoo.com](mailto:drzahid1981@yahoo.com)  
28

29  
30 12 \*Corresponding Author:  
31

32 14 Email : [zamanm@who.int](mailto:zamanm@who.int) (MMZ)  
33  
34 15  
35 16  
36 17  
37 18  
38 19  
39 20  
40 21  
41 22  
42 23  
43 24  
44 25  
45 26  
46 27  
47 28  
48  
49  
50  
51  
52  
53  
54  
55  
56  
57  
58  
59  
60

## 29 **Abstract**

30 Objectives: With the increasing burden of non-communicable diseases in low- and middle-  
31 income countries, biological risk factors such as raised blood glucose are a major public health  
32 concern in Bangladesh. Nationally representative data of raised blood glucose prevalence  
33 starting from age  $\geq 18$  years are currently unavailable for Bangladeshi adults. The objective of  
34 this study was to assess the prevalence and determinants of raised blood glucose among adults  
35 in Bangladesh aged  $\geq 18$  years.

36  
37 Study Design: Cross-sectional, population-based study

38  
39 Setting and Participants: Data for this analysis were collected from a population-based  
40 nationally representative sample of 1843 adults, aged  $\geq 18$  years, from both urban and rural  
41 areas of Bangladesh. Demographic information, capillary blood glucose, blood pressure, height,  
42 weight, waist circumference, and treatment history were recorded.

43  
44 Primary Outcome Measures: Raised blood glucose was defined as a random capillary blood  
45 glucose level of  $\geq 11.1$  mmol/L or currently taking medication to control diabetes, based on self-  
46 report.

47  
48 Results: Overall, the prevalence of raised blood glucose was 5.5% (95% CI: 4.5-6.6) and was  
49 significantly higher among urban (9.8%, 95%CI: 7.7-12.2) than rural residents (2.8%, 95% CI:  
50 1.9 – 3.9). The age-standardized prevalence of raised blood glucose was 5.6% (95% CI: 4.6 –  
51 6.8). Among both urban and rural residents, associated determinants of raised blood glucose  
52 included hypertension, and abdominal obesity. About 5% of the total population self-reported to  
53 have been previously diagnosed with diabetes; among these adults, over 25% were not taking  
54 medications to control their diabetes.

1  
2  
3 55 Conclusions: Our study found that about 1 out of 20 Bangladeshi adults aged  $\geq 18$  years have  
4  
5 56 raised blood glucose. To control and prevent the development of diabetes, data from this study  
6  
7 57 can be used to inform public health programming and provide descriptive information on  
8  
9 58 surveillance of progress towards controlling diabetes in Bangladesh.  
10

11 59

12  
13  
14 60 **Keywords:** non-communicable diseases, Bangladesh, raised blood glucose, diabetes, chronic  
15  
16 61 disease

17 62

18 63

19 64

20 65

21 66

22 67

23 68

24 69

25 70

26 71

27 72

28 73

29 74

30 75

31 76

32 77

33 78

34 79

35 80

## Article Summary

### Strengths and Limitations of the Study

- This study utilized a multistage, geographically clustered, probability-based sampling approach to produce nationally representative data for Bangladesh.
- We included Bangladeshi adults aged 18 to 29 years to obtain novel data on the prevalence of diabetes and relevant non-communicable disease risk factors starting from this age group.
- We were able to estimate the prevalence of raised blood glucose using capillary blood glucose measured at random. However, we were unable to measure the prevalence of prediabetes and diabetes as we did not obtain blood sugar levels using standardized methods, such as fasting blood glucose or 2-hour post-prandial measurements.
- Due to the cross-sectional nature of the study design, we were unable to assess temporality of risk factors identified and our outcomes of interest.
- We assessed diabetes medication history based on self-report, however, we were unable to obtain medical records or prescription records of participants to confirm the self-reported data.

## 108 **Background**

109 Globally, diabetes mellitus (DM), characterized by raised blood glucose, is a leading  
110 cause of premature mortality and disability<sup>1</sup>. The global prevalence of DM has been on the rise  
111 over the past several decades<sup>1 2</sup>. Recent estimates reflect the global prevalence of diabetes has  
112 nearly doubled among adults aged 18 years and above, rising from 4.7% in 1980 to 8.5% in  
113 2014<sup>3</sup>. This growing burden is most prominent in low- and middle-income countries<sup>4</sup> particularly  
114 the Indian sub-continent<sup>5</sup>. South and Southeast Asia accounts for close to one-fifth of all  
115 diabetes cases worldwide and the prevalence of diabetes in this region is projected to increase  
116 by 71% by 2035<sup>6</sup>. In Bangladesh, specifically, the International Diabetes Federation projects the  
117 prevalence of diabetes will increase to more than 50% in the next 15 years<sup>6</sup>.

118 The increase in prevalence of diabetes among Bangladeshi adults over the past few  
119 decades has been documented: Based on a meta-analysis of studies conducted from 1995 –  
120 2010, the prevalence of diabetes among Bangladeshi adults aged 30 years and above  
121 increased from 4% in 1995 to 2000 and 5% in 2001 to 2005 to 9% in 2006 to 2010<sup>7</sup>. Studies to  
122 assess the burden of diabetes has been conducted in Bangladesh in both urban and rural  
123 populations over the last decades<sup>8</sup>. However, national data on the prevalence of diabetes or  
124 raised blood glucose starting at age 18 years are currently unavailable<sup>8-11</sup>. These data are  
125 valuable for monitoring progress made towards one of the nine global non-communicable  
126 disease (NCD) targets of the year 2025, set forth by the World Health Organization's (WHO)  
127 NCD Global Monitoring Framework: To observe a 0% increase in age-standardized prevalence  
128 of raised blood glucose or diabetes among persons aged  $\geq 18$  years<sup>12</sup>. As such in response to  
129 the WHO Global Action Plan for the Prevention and Control of NCDs<sup>13</sup>, descriptive  
130 epidemiological data on the burden of raised blood glucose among adults starting at 18 years  
131 are needed to monitor national progress of interventions implemented to reduce the burden of  
132 DM in Bangladesh<sup>14-16</sup>. Here, using a nationally representative sample, we present data on  
133 prevalence and determinants of raised blood glucose by various sociodemographic factors such

1  
2  
3 134 as age, sex, and area of residence among Bangladeshi adults aged 18 years and above,  
4  
5 135 residing in both urban and rural areas of the country. Additionally, we explore treatment  
6  
7 136 patterns, and control of raised blood glucose among participants in our sample of Bangladeshi  
8  
9 137 adults.

10  
11  
12 138

## 13 139 **Methods**

14  
15  
16 140 Data for this analysis were collected as part of a national assessment of the burden of  
17  
18 141 musculoskeletal disorders in Bangladesh conducted by investigators from the Bangabandhu  
19  
20 142 Sheikh Mujib Medical University (BSMMU) with technical assistance from the WHO Country  
21  
22 143 Office for Bangladesh, as previously described<sup>17</sup>. The study was a population-based cross-  
23  
24 144 sectional study carried out from November to December 2015 and followed the WHO STEP-  
25  
26 145 wise approach to Surveillance of NCD risk factors (STEPS)<sup>18</sup>. The target population of this  
27  
28 146 survey was men and women aged  $\geq 18$  years residing in rural and urban areas of Bangladesh.  
29  
30 147 The exclusion criteria included, tourists and the institutionalized, including residents of hospitals,  
31  
32 148 prisons, nursing homes, and army barracks.

### 33 149 Sampling Methods

34  
35  
36  
37 150 To obtain a population-based sample of Bangladesh, this survey adopted a multistage,  
38  
39 151 geographically clustered, probability-based sampling approach. Population statistics were  
40  
41 152 obtained using the updated national census conducted by Bangladesh Bureau of Statistics  
42  
43 153 (BBS) in 2009<sup>19</sup>. To obtain our primary sampling unit (PSU), we utilized the following  
44  
45 154 geographical distribution described: In Bangladesh, there are seven divisions, which are the  
46  
47 155 largest administrative units of the country. Each division is divided into several districts (*Zila*)  
48  
49 156 and within each district, there are several sub-districts (*Upazila*). Within sub-districts, *mauzas*  
50  
51 157 and *mahallas* (commonly known as neighborhoods or blocks) are the smallest units within  
52  
53 158 defined territories in rural and urban areas respectively. *Mauzas* and *mahallas* were considered  
54  
55 159 the PSU for the study's sampling approach. The households within the *mauzas* and *mahallas*



1  
2  
3 160 were the secondary sampling units. We utilized the BBS' definition of household which is as  
4  
5 161 follows: "a dwelling in which persons either related or unrelated were living together and taking  
6  
7 162 food from the same kitchen"<sup>19</sup>.  
8

9 163 The power analysis and sample size calculations were completed based on the  
10  
11 164 standardized approach outlined in WHO STEPS methodology <sup>18</sup>. Using the WHO STEPS  
12  
13 165 methodology, the minimum number of participants required was 296 in each group (rural males,  
14  
15 166 rural females, urban males, and urban females). Assuming a design effect of 1.5 adjusted within  
16  
17 167 cluster population homogeneity, the necessary sample size was 1776. We assumed a response  
18  
19 168 rate of 90% and determined we would need to contact at least 1973 adults. For simplicity, our  
20  
21 169 target sample size was 2000. Twenty PSUs (8 urban and 12 rural) were randomly selected from  
22  
23 170 7 divisions of the country, with the probability proportional to the population size of each  
24  
25 171 division. In each PSU, 100 consecutive households were selected. The even numbered  
26  
27 172 households were designated as a "male household" and odd numbered households as a  
28  
29 173 "female household." Finally, one male or female was approached to participate from each  
30  
31 174 respective household as designated.  
32  
33

### 34 Data collection

35  
36  
37 176 Through a structured survey, we collected data on the following topics: musculoskeletal  
38  
39 177 disorders<sup>20</sup>, health history, and demographic data such as age, area of residence, education,  
40  
41 178 current (last 12 month) occupation, tobacco use and physical activity. Physical measurements  
42  
43 179 such as height, weight, waist circumference, blood glucose levels, and blood pressure were  
44  
45 180 collected. To measure blood glucose levels, we obtained random blood glucose samples <sup>3</sup>, per  
46  
47 181 the clinical guidelines of diabetes diagnostic criteria of Bangladesh<sup>21</sup>. Capillary blood samples  
48  
49 182 were consistently taken from the index finger of the right arm using a glucometer, namely Accu-  
50  
51 183 chek Advantage (Roche Diagnostics Division, Grenzachstrasse, Switzerland).  
52

53  
54 184 Each participant's history of diabetes was assessed based on self-report. Specifically,  
55  
56 185 participants were asked: 1. Have you ever been diagnosed with diabetes by a health care  
57  
58  
59  
60

1  
2  
3 186 professional? 2. If yes, are you receiving treatment for diabetes? Treatment history of diabetes  
4  
5 187 was confirmed by prescription, including medicine strips or insulin injection vials, or medical  
6  
7 188 record when possible. Medicine strips or injection vials were checked when possible. The  
8  
9 189 questionnaire was translated from English to Bengali, adapted and validated as per standard  
10  
11 190 procedure. Data collection procedures were standardized across study sites through  
12  
13 191 coordinated training of field staff conducted by epidemiologists, study physicians, and WHO  
14  
15 192 staff members.

16  
17  
18 193 Blood pressure was measured by a trained field interviewer using the LifeSource UA-  
19  
20 194 767+ blood pressure monitor, as recommended by the WHO, and appropriately sized arm cuffs.  
21  
22 195 Blood pressure measurements were consistently taken on each participant's right arm at the  
23  
24 196 level of the heart and elbow-assisted. The initial measurement was performed after five minutes  
25  
26 197 of rest. After two minutes, the second measurement was taken. The mean of these two blood  
27  
28 198 pressure readings was utilized as the final blood pressure for each participant.

29  
30  
31 199 Following data collection, participants were scheduled a visit with the study research  
32  
33 200 physician within the following five-days. The research physician assessed the participant's  
34  
35 201 medical history, either through self-report or using medical records when possible. Study  
36  
37 202 physicians examined each participant to confirm the results of data collection through classical  
38  
39 203 symptom assessment. When necessary, the participant was also evaluated by the divisional  
40  
41 204 investigator for a second opinion of relevant diagnoses.

#### 42 43 205 Outcome definitions

44  
45 206 Our primary outcome of interest was prevalence of raised blood glucose. We utilized the  
46  
47 207 American Diabetes Association (ADA) guidelines to define a diagnosis of raised blood glucose  
48  
49 208 using random or casual plasma glucose test and symptom review by the study physician <sup>22</sup>. An  
50  
51 209 individual was considered to have raised blood glucose if the plasma glucose level was 11.1  
52  
53 210 mmol/L or higher with classic symptoms of hyperglycemia, and/or if they self-reported to take  
54  
55 211 medication to control their diabetes. Our secondary outcome of interest was prevalence of self-

1  
2  
3 212 reported diabetes mellitus. An individual was categorized as diabetic if they self-reported to  
4  
5 213 have been previously diagnosed with diabetes by a health care provider.  
6

7 214 Covariates  
8

9 215 The following variables were assessed as covariates for analysis: area of residence,  
10  
11 216 sex, age, education, occupation, wealth index, body mass index (BMI), BP, and waist  
12  
13 217 circumference. Education was categorized into four groups: no education, primary education  
14  
15 218 (completed grade  $\leq 5$ ), secondary education (completed  $\leq$  grade 10), and above secondary  
16  
17 219 education (completed  $\geq$  grade 12). Occupation was categorized into five groups. These groups  
18  
19 220 included: professional employment (field staff, police officer, guard, doctor, engineer,  
20  
21 221 professional, business man, desk job), unemployed or retired, industrial worker or day laborer,  
22  
23 222 housewife, and other (shop keeper, weaver, driver, student, beggar, cook, carpenter, tailor,  
24  
25 223 migrant workers and fishermen).  
26  
27

28 224 Data on physical activity was collected based on self-report. First, respondents were  
29  
30 225 asked the number of days they engaged in in vigorous, moderate, or light physical activity  
31  
32 226 throughout a typical week. The following definitions were used to define (1) vigorous, (2)  
33  
34 227 moderate, and (3) light physical activity, respectively: (1) vigorous activity was defined as any  
35  
36 228 activity that causes large increases in breathing or heart rate, if continued for at least 10 minutes  
37  
38 229 (e.g. running, carrying heavy loads, digging or construction work); (2) Moderate activity was  
39  
40 230 defined as any activity that causes small increase in breathing or heart rate, if continued for at  
41  
42 231 least 10 minutes (brisk walking or carrying light loads); and (3) Light physical activity was  
43  
44 232 defined as activities such as office work. Next, we asked participants to estimate how many  
45  
46 233 minutes per day they engaged in the activity. MET-minute was calculated using the STEPS  
47  
48 234 protocol<sup>23</sup> as follows: one minute of light activity was equivalent to 1 MET-minute; one minute in  
49  
50 235 moderate-intensity activity related activities was equivalent to 4 MET-minutes, and one minute  
51  
52 236 of vigorous-intensity was equivalent to 8 MET-minutes. Physical activity was then categorized  
53  
54 237 based on total MET-minutes per week. Participants who spent 3000 or more MET-minutes per  
55  
56  
57  
58  
59  
60

1  
2  
3 238 week were categorized in the vigorous physical activity group, 600-3000 MET-minutes were  
4  
5 239 categorized as moderate physical activity, and <600 MET-minutes were categorized as low  
6  
7 240 physical activity.  
8

9 241 The wealth index was constructed using principal component analysis. Asset information  
10  
11 242 collected covered information on household ownership of nineteen items, including: electricity,  
12  
13 243 flush toilet, land telephone, cell phone, television, radio, refrigerator, car, motorcycle, washing  
14  
15 244 machine, bicycle, sewing machine, wardrobe, table, bed or cot, chair or bench, watch or clock.  
16  
17 245 Additionally, we assessed the main type of material used to build each participant's home (i.e.  
18  
19 246 cement, tin, bamboo, or thatched straw). Each asset was assigned a weight (factor score)  
20  
21 247 generated through principal components analysis, and the resulting asset scores were  
22  
23 248 standardized to a normal distribution with a mean of zero and standard deviation of one. Each  
24  
25 249 household was then assigned a score for each asset, and the scores were summed up;  
26  
27 250 individuals were ranked according to the total score of the household in which they resided. The  
28  
29 251 sample was then divided into quartiles from quartile one (lowest) to quartile four (highest).  
30  
31 252 Using height (centimeters) and weight (kilograms) measurements, we calculated BMI  
32  
33 253 (height/weight<sup>2</sup>). BMI was categorized in the following groups: underweight ( $\leq 18.5$ ), normal  
34  
35 254 ( $\leq 25$ ), overweight (25.1-30) and obese ( $>30$ ). Waist circumference was measured in centimeters  
36  
37 255 (cm). Participants were categorized as abdominally obese if waist circumference was 90 cm and  
38  
39 256 above for men, or 80 cm and above for women. Prehypertension was defined as SBP  $\geq 120$   
40  
41 257 mmHg but  $< 140$  mmHg and/or DBP  $\geq 80$  mmHg but  $< 90$  mmHg and not taking anti-  
42  
43 258 hypertensive medication at the time of the survey. We utilized the WHO's guidelines for cut-off  
44  
45 259 points to define hypertension<sup>24</sup>. An individual was considered to have hypertension if systolic  
46  
47 260 blood pressure (SBP) was  $\geq 140$  mmHg (millimeters of mercury) and/or, diastolic blood pressure  
48  
49 261 (DBP)  $\geq 90$  mmHg, and/or taking anti-hypertensive medication based on self-report.  
50  
51  
52  
53

54 262

### 56 263 Age-Standardized Prevalence Estimates

1  
2  
3 264 To facilitate comparison of overall raised blood glucose among Bangladeshi adults  
4  
5 265 across global populations with different age compositions we calculated age-standardized  
6  
7 266 prevalence estimates with 95% confidence intervals (CIs) using the WHO's World Standard  
8  
9 267 Population<sup>25</sup>. The World Standards database (WHO 2000-2025) provided population estimates  
10  
11 268 for 18 and 19 age groups, as well as single year ages. To derive single ages from the 5-year  
12  
13 269 age group proportions publically available, we used the Beers "Ordinary" Formula<sup>26</sup>. The  
14  
15 270 following formula was utilized for standardization:  
16  
17  
18 271  $\sum p_i * w_i / \sum w_i$ , where p = observed prevalence and w = world population weight.  
19  
20 272

### 21 22 273 Data Analysis

23  
24 274 Sociodemographic variables were presented with mean and standard deviation (SD) for  
25  
26 275 continuous variables, and using proportions for categorical variables. For bivariate analyses,  
27  
28 276 study participants were divided by sex and into four age groups (18-29, 30-44, 45-54 and ≥55  
29  
30 277 years). We calculated the prevalence of our primary outcome by key demographic variables and  
31  
32 278 calculated 95% CIs using the binomial exact method.  
33  
34

35 279 To estimate determinants of raised blood glucose, we computed prevalence ratios with  
36  
37 280 Poisson regression using robust estimation of standard errors<sup>27-29</sup>. Potential variables for  
38  
39 281 inclusion in the model were assessed using prior published literature and bivariate Poisson  
40  
41 282 regression analysis; an arbitrary p-value of <0.10 was used as criteria to include the variable in  
42  
43 283 the multivariable Poisson regression model to control for confounding effects. For multivariable  
44  
45 284 Poisson regression models, adjusted prevalence ratios (aPR), and 95% CIs for each  
46  
47 285 independent variable were calculated. Additionally, <0.05 was used as the level of significance.  
48  
49 286 Multivariable Poisson regression models were generated separately for urban and rural  
50  
51 287 participants to account for possible effect measure modification. Collinearity was assessed  
52  
53 288 using the variance inflation factor to ensure a strong linear relationship among independent  
54  
55  
56  
57  
58  
59  
60

289 variables included in the model was not present. All statistical procedures were performed using  
290 Stata/SE 15.0 (StataCorp LP, Texas, USA) software package.

291

## 292 **Results**

### 293 Background Characteristics

294 Of the 2000 adults approached, 1843 agreed to participate in our study leading to a  
295 response rate of 92.1%. Twenty-four female participants were pregnant and were dropped from  
296 subsequent analyses to ensure those with gestational diabetes were not included. There were  
297 892 (49.0%) male and 927 (50.9%) female respondents (Table 1). Age of our participants  
298 ranged from 18 to 90 years. The mean age and education level of participants was 40.5  
299 (SD=14.7) years and 5.7 (SD=5.1) years, respectively. The majority of the population was  
300 married (88.0%) and employed as either an industrial worker/day laborer (26.5%) or housewife  
301 (39.9%). Almost half of the population never used some form of tobacco. The majority of  
302 participants engaged in vigorous physical activity over an average week (69.3%). The mean  
303 BMI was 22.1 (SD = 4.1) and mean waist circumference was 78.4 cm (SD = 11.6). Overall, the  
304 mean systolic blood pressure was 116.1 mmHg (SD = 17.1) and diastolic blood pressure was  
305 76.1 mmHg (SD=10.5). The mean blood glucose level was 6.4 mmol/L (SD = 2.4). Figure 1  
306 presents the distribution of blood glucose levels by various demographic factors.

307

### 308 Prevalence and Risk Factors for Raised Blood Glucose

309 The prevalence of raised blood glucose was 5.5% (95% CI: 4.5-6.6). This prevalence  
310 was significantly higher among urban participants (9.8%, 95%CI: 7.7-12.2) than rural  
311 participants (2.8%, 95% CI: 1.9 – 3.9) (Table 2) and increased as age increased (Figure 2). The  
312 highest prevalence of raised blood glucose was observed among those aged  $\geq 55$  years, at  
313 8.2% (95% CI: 4.6-13.1) among men and 9.4% (95% CI: 5.4-14.8) among women. The age-  
314 standardized prevalence of raised blood glucose was 5.6% (95% CI: 4.6 – 6.8). The age-

1  
2  
3 315 standardized prevalence of raised blood glucose among urban and rural residents was 10.5%  
4  
5 316 (95% CI: 9.2-12.1) and 2.8% (95% CI: 2.1-3.7), respectively. Among men and women, the age-  
6  
7 317 standardized prevalence of raised blood glucose was 4.9% (95% CI: 3.9-6.0) and 6.0% (95% CI:  
8  
9 318 4.9-7.2), respectively.  
10

11 319

### 12 13 14 320 Self-Reported Diabetes Mellitus and Raised Blood Glucose

15  
16 321 Ninety-five participants (5.2%) self-reported to have been previously diagnosed with  
17  
18 322 diabetes by a health care provider. However, 25 of these individuals did not meet our criteria of  
19  
20 323 diagnosis of raised blood glucose as they did not take medication to control their diabetes and  
21  
22 324 their plasma glucose was below 11.1 mmol/L. Therefore, 69.3% of those with raised blood  
23  
24 325 glucose, per the study definition, were previously diagnosed with diabetes by a health care  
25  
26 326 provider. The proportion of men and women who were previously diagnosed with diabetes by a  
27  
28 327 health care based on self-report was higher among urban residents (men: 8.4%; women: 9.1%)  
29  
30 328 than among rural residents (men: 2.9%; women: 3.0%) (Figure 3a). However, overall, the large  
31  
32 329 majority (81.8%) reported they did not know if they had been previously diagnosed with  
33  
34 330 diabetes; this proportion was higher among rural residents (87.8%) than urban residents  
35  
36 331 (72.2%). Among participants previously diagnosed with diabetes based on self-report, 72.6%  
37  
38 332 reported to take medication to control their diabetes. Urban women more frequently (96.7%)  
39  
40 333 self-reported to take diabetes medication than urban men (62.1%) (Figure 3b).

41  
42  
43 334 Among participants who were diagnosed with raised blood glucose at study  
44  
45 335 measurement, over one-third (37.9%), of urban men self-reported to have diabetes, however,  
46  
47 336 did not take any medication to control their diabetes. Among rural participants, the proportion of  
48  
49 337 women who did not take medication to control their self-reported diabetes was higher (52.9%)  
50  
51 338 than men (31.3%). Although three quarters of self-reported diabetic participants reported to take  
52  
53 339 medication to control their diabetes, 31% continued to have high blood sugar levels indicating  
54  
55 340 uncontrolled diabetes at study measurement (Figure 4).  
56  
57  
58  
59  
60



341  
342 **Determinants of Raised Blood Glucose**

343 Table 2 presents results of multivariable Poisson regression with robust variance  
344 analyses to identify determinants of raised blood glucose. Among urban participants, those of  
345 older age, lowest wealth quartile, hypertension, low physical activity, and with abdominal obesity  
346 based on waist circumference, were more likely to have raised blood glucose. The prevalence  
347 of raised blood glucose was significantly highest among those aged  $\geq 55$  years (aPR 3.92, 95%  
348 CI: 1.48 – 10.39) compared to individuals aged 18-29 years of age. When compared to those in  
349 the 4<sup>th</sup> (highest) wealth quartile, urban residents in the first (lowest) wealth quartile had 3.18  
350 times the prevalence of raised blood glucose. For urban individuals with hypertension, the  
351 prevalence of raised blood glucose was 2.65 (95% CI: 1.30-5.38) times that of individuals  
352 without hypertension. The prevalence of raised blood glucose among those with low physical  
353 activity was 3.01 (95% CI: 1.42- 6.38) times that of urban participants with vigorous physical  
354 activity. Abdominal obesity also significantly increased the prevalence of raised blood glucose  
355 among urban participants (aOR: 2.54, 95% CI: 1.35-4.77). Among rural participants, the only  
356 observed determinants of raised blood glucose were hypertension (aPR: 5.39, 95% CI: 1.94 –  
357 14.96) and abdominal obesity (aPR: 2.95, 95% CI: 1.32 – 6.58).

358  
359 **Discussion**

360 Using data from this nationally representative sample, we estimate that about one in  
361 twenty Bangladeshi adults aged  $\geq 18$  years have raised blood glucose. The prevalence of raised  
362 blood glucose was higher among urban residents (9.8%), than rural residents (2.8%).  
363 Prevalence of raised blood glucose increased with age, urban residence, abdominal obesity,  
364 low physical activity, and hypertension. As diabetes is characterized by raised blood glucose,  
365 targeting high-risk groups identified in this analysis could be prioritized for organized diabetes  
366 preventive programs in Bangladesh. Bangladesh has adopted the goals and targets set forth by



1  
2  
3 367 the WHO's Global Monitoring Framework for the Prevention and Control of NCDs for the year  
4  
5 368 2025<sup>12</sup>. One of these targets is to ensure there is a 0% increase in the age-standardized  
6  
7 369 prevalence of raised blood glucose among adults aged  $\geq 18$  years by the year 2025. To our  
8  
9 370 knowledge, the present study is the first to report national estimates on prevalence of raised  
10  
11 371 blood glucose starting at age 18 years in both urban and rural areas of Bangladesh. Data  
12  
13 372 gathered from this national-level study are critical towards the measurement of progress  
14  
15 373 towards the nine global targets for Bangladesh for 2025.

16  
17  
18 374 In our study, the age-standardized prevalence of raised blood glucose was 5.6%, and  
19  
20 375 was significantly higher in urban areas than rural areas. This may be due to differences in life  
21  
22 376 style factors such as physical activity, diet, and tobacco use. These findings are similar to prior  
23  
24 377 studies conducted to measure the prevalence of diabetes among adults in Bangladesh<sup>8 10 11 30 31</sup>.  
25  
26 378 A recently published review, identified about 22 studies conducted to estimate the prevalence of  
27  
28 379 diabetes in different settings, including rural and urban, and varying age groups including  $\geq 20$   
29  
30 380 years,  $\geq 30$  years, and  $\geq 35$  years<sup>8</sup>. Estimates of diabetes prevalence ranged from 4.5% and  
31  
32 381 35%, however, the pooled estimate was 7.4% (95% CI: 7.2-7.6). The pooled estimate is higher  
33  
34 382 than our study's findings, however, our cohort is generally younger and this may lead to the  
35  
36 383 lower prevalence estimate.

37  
38  
39 384 Significant determinants of raised blood glucose in both urban and rural areas of our  
40  
41 385 assessment included hypertension, low physical activity, and abdominal obesity. Interestingly,  
42  
43 386 there was no association of diabetes identified for increasing body mass index (BMI). This  
44  
45 387 indicates that abdominal obesity may be a more significant factor to consider than BMI. Prior  
46  
47 388 studies conducted in Bangladesh have also identified a positive association of central (or  
48  
49 389 abdominal) obesity with diabetes<sup>32</sup>. Interestingly, our assessment found a decrease in odds of  
50  
51 390 diabetes with increasing wealth quartile. Prior studies have conflicting findings on the risk of  
52  
53 391 diabetes and other NCDs, among the wealthy based on demographic features such as area of  
54  
55 392 residence. One prior study conducted in Bangladesh found that people from the highest wealth  
56  
57  
58  
59  
60

1  
2  
3 393 quintile are significantly more likely to have diabetes than people from the lowest wealth  
4  
5 394 quintile<sup>33</sup>. However, another found a high burden of selected NCDs, including diabetes, among  
6  
7 395 the lowest wealth quintile populations in rural areas and wealthy populations in urban areas<sup>34</sup>.  
8  
9 396 Further study is warranted to assess the reliability of wealth indices as a measurement of  
10  
11 397 socioeconomic status and wealth among Bangladeshi adults.

12  
13  
14 398 In our study, a high proportion (~70%) of those with raised blood glucose self-reported to  
15  
16 399 have been previously diagnosed with diabetes and therefore, aware of their condition.  
17  
18 400 Additionally, 72% reported to take medication to control their diabetes. However, we found that  
19  
20 401 almost one-third of those who self-reported to take medication for their diabetes, continued to  
21  
22 402 have raised blood glucose. Efforts should be made to ensure diabetics in Bangladesh are  
23  
24 403 treated for their condition and secondary prevention of complications of diabetes, such as  
25  
26 404 diabetic retinopathy. This is of particular concern in developing countries where resources are  
27  
28 405 limited and cost-effective solutions for chronic disease treatment should be prioritized. A  
29  
30 406 recently published study found that healthcare expenditure in persons with diabetes in  
31  
32 407 Bangladesh is six times higher than in persons without diabetes<sup>15</sup>. Prevention and management  
33  
34 408 of diabetes is likely to be a cost-saving approach for Bangladesh through the utilization of  
35  
36 409 community health workers adequately trained to effectively screen for, and identify, people with  
37  
38 410 diabetes<sup>35</sup>.

39  
40  
41 411 This study has several strengths. Data collected for our study was of a nationally  
42  
43 412 representative sample indicating our results are highly generalizable to the total population of  
44  
45 413 Bangladeshis aged 18 years and above. Our sample of 1843 allowed us to do an effective  
46  
47 414 analysis of further subgroups. However, several limitations should also be considered when  
48  
49 415 interpreting the results of this analysis. We assessed blood glucose levels using random  
50  
51 416 capillary blood samples, however, we did not assess history of classical symptoms of  
52  
53 417 hyperglycemia, which is necessary to diagnose diabetes according to the ADA guidelines<sup>22</sup>.  
54  
55 418 Additionally, we were unable to measure factors such as family history of diabetes, and obtain  
56  
57  
58  
59  
60

1  
2  
3 419 blood glucose samples in fasting or two-hour post-prandial status to also assess prediabetes.  
4  
5 420 Future studies should consider the addition of glycosylated hemoglobin measurement when  
6  
7 421 assessing the prevalence of diabetes as this method could provide more long-term and stable  
8  
9 422 diagnosis of diabetes mellitus. As such, we have an adequate sample size to measure  
10  
11 423 prevalence of diabetes. Finally, due to the cross-sectional nature of this study, we were unable  
12  
13 424 to define temporality of certain determinants of raised blood glucose identified and therefore,  
14  
15 425 unable to assess causality.  
16  
17  
18 426

## 19 20 427 **Conclusion**

21  
22 428 Data from this nationally-representative sample of Bangladeshi adults aged 18 years  
23  
24 429 and above will be critical to inform the progress of NCD control in Bangladesh per the WHO's  
25  
26 430 Global Monitoring Framework and goals for 2025. We found that about one in twenty  
27  
28 431 Bangladeshi adults aged  $\geq 18$  years have raised blood glucose. Among urban residents, we  
29  
30 432 found that about one in ten Bangladeshi adults aged  $\geq 18$  years have raised blood glucose .  
31  
32 433 Bangladeshi adults with hypertension and abdominal obesity are high-risk groups for the  
33  
34 434 development of diabetes and should be targeted for routine screening for diabetes. Preventive  
35  
36 435 methods such as lifestyle changes and medication should be recommended by primary care  
37  
38 436 providers in Bangladesh to avoid the future development of CVDs among this group. In order to  
39  
40 437 control the prevalence of raised blood glucose, and reduce the burden of diabetes and  
41  
42 438 associated risk factors, national initiatives such as training community health workers to deliver  
43  
44 439 primary care and implementing universal health coverage should be implemented to curb the  
45  
46 440 spread of NCDs in Bangladesh.  
47  
48  
49  
50 441  
51  
52 442  
53  
54 443  
55  
56 444

1  
2  
3 445 Figures  
4

5 446 Figure 1: Urban and Rural differences in distribution of blood glucose levels based on random  
6  
7 447 capillary blood measurement among (A) All Participants, and (B) Men and Women (n = 1819)  
8

9 448 Figure 2: Prevalence of raised blood glucose among Bangladeshi adults aged 18 years and  
10  
11 449 above by sex and age group, 2015 (n = 1819)  
12

13 450 Figure 3: Bangladeshi adults aged 18 years and above with (A) self-reported diabetes and (B)  
14  
15 451 self-reported diabetics on diabetes medications, 2015  
16

17 452 Figure 4: Self-reported diabetics aged 18 years or older who take diabetes medication with  
18  
19 453 raised blood glucose on study measurement ( $\geq 11.0$ mmol/L)  
20  
21

22 454

23  
24 455

25  
26 456

27  
28 457

29  
30 458

31  
32 459

33  
34 460

35  
36 461

37  
38 462

39  
40 463

41  
42 464

43  
44 465

45  
46 466

47  
48 467

49  
50 468

51  
52 469

53  
54 470  
55  
56  
57  
58  
59  
60

1  
2  
3 471 **Abbreviations**  
4

5 472 WHO: World Health Organization  
6

7 473 ADA: American Diabetes Association  
8

9 474 aPR: Adjusted prevalence ratio  
10

11 475 BBS: Bangladesh Bureau of Statistics  
12

13 476 BMI: Body mass index  
14

15 477 BP: Blood pressure  
16

17 478 BSMMU: Bangabandhu Sheikh Mujib Medical University  
18

19 479 CI: Confidence interval  
20

21 480 CVD: Cardiovascular disease  
22

23 481 MET: Metabolic equivalent  
24

25 482 mmHg: Millimeter of mercury  
26

27 483 mmol/L: Millimoles per litre  
28

29 484 NCD: Non-communicable disease  
30

31 485 SBP: Systolic blood pressure  
32

33 486 DBP: Diastolic blood pressure  
34

35 487 PSU: Primary sampling unit  
36

37 488 SD: Standard deviation  
38

39 489 STEPS: STEPwise approach to surveillance  
40

41 490  
42

43 491  
44

45 492  
46

47 493  
48

49 494  
50

51 495  
52

53 496  
54

1  
2  
3 497 **Footnotes**  
4

5 498 Ethics approval and consent to participate: Ethical guidelines as outlined by the Declaration of  
6  
7 499 Helsinki were followed throughout the study. Ethical clearance was obtained from Institutional  
8  
9 500 Review Board of Bangabandhu Sheikh Mujib Medical University (BSMMU). We obtained  
10  
11 501 permission from the relevant administrative units of the surveyed districts. Orientations with  
12  
13 502 community leaders (elected representatives of the local government offices) were conducted  
14  
15 503 prior to data collection for community engagement in the study's implementation process.  
16  
17 504 Written (or thumb impression if unable to write) consent was obtained from the respondents in  
18  
19 505 Bangla as per BSMMU Institutional Review Board (IRB) guidelines.  
20  
21

22 506 Consent to publish: All authors consent to the publication of this manuscript.  
23

24 507 Availability of data and materials: The datasets used and/or analyzed during the current study  
25  
26 508 are available from the corresponding author on reasonable request.  
27

28 509 Competing Interests: The authors declare no competing interests. The authors alone are  
29  
30 510 responsible for views expressed in this article and they do not necessarily represent the views,  
31  
32 511 decisions or policies of the institutions with which they are affiliated.  
33

34 512 Funding: The study was conducted with technical and financial assistance of the World Health  
35  
36 513 Organization Country Office for Bangladesh.  
37

38 514 Authors contributions: JYI: analyzed data, interpreted results, and drafted the manuscript. MMZ:  
39  
40 515 designed the study, interpreted results critically, conceptualized the manuscript, guided  
41  
42 516 manuscript writing, and critically reviewed it. MRB, SAH, SA, ZAQ: trained the field team,  
43  
44 517 implemented the survey, processed and analyzed data, and reviewed the manuscript.  
45  
46

47 518 Acknowledgements: The authors thank Mr. Hassanuzzaman Khan for his efforts on data  
48  
49 519 management.  
50

51 520  
52

53 521  
54

55 522  
56  
57  
58  
59  
60

523 **References**

- 524 1. Lozano R, Naghavi M, Foreman K, et al. Global and regional mortality from 235 causes of  
525 death for 20 age groups in 1990 and 2010: a systematic analysis for the Global Burden  
526 of Disease Study 2010. *Lancet (London, England)* 2012;380(9859):2095-128. doi:  
527 10.1016/S0140-6736(12)61728-0
- 528 2. Murray CJ, Vos T, Lozano R, et al. Disability-adjusted life years (DALYs) for 291 diseases  
529 and injuries in 21 regions, 1990-2010: a systematic analysis for the Global Burden of  
530 Disease Study 2010. *Lancet (London, England)* 2012;380(9859):2197-223. doi:  
531 10.1016/S0140-6736(12)61689-4
- 532 3. Global report on diabetes. Geneva, Switzerland: World Health Organization 2016.
- 533 4. Wild S, Roglic G, Green A, et al. Global prevalence of diabetes: estimates for the year 2000  
534 and projections for 2030. *Diabetes care* 2004;27(5):1047-53.
- 535 5. Jayawardena R, Ranasinghe P, Byrne NM, et al. Prevalence and trends of the diabetes  
536 epidemic in South Asia: a systematic review and meta-analysis. *BMC public health*  
537 2012;12:380. doi: 10.1186/1471-2458-12-380
- 538 6. IDF diabetes atlas sixth edition Brussels, Belgium Interational Diabetes Federation, 2013.
- 539 7. Saquib N, Saquib J, Ahmed T, et al. Cardiovascular diseases and type 2 diabetes in  
540 Bangladesh: a systematic review and meta-analysis of studies between 1995 and 2010.  
541 *BMC public health* 2012;12:434. doi: 10.1186/1471-2458-12-434
- 542 8. Biswas T, Islam A, Rawal LB, et al. Increasing prevalence of diabetes in Bangladesh: a  
543 scoping review. *Public health* 2016;138:4-11. doi: 10.1016/j.puhe.2016.03.025
- 544 9. Rahman MS, Akter S, Abe SK, et al. Awareness, treatment, and control of diabetes in  
545 Bangladesh: a nationwide population-based study. *PloS one* 2015;10(2):e0118365. doi:  
546 10.1371/journal.pone.0118365

- 1  
2  
3 547 10. Akter S, Rahman MM, Abe SK, et al. Prevalence of diabetes and prediabetes and their risk  
4  
5 548 factors among Bangladeshi adults: a nationwide survey. *Bulletin of the World Health*  
6  
7 549 *Organization* 2014;92(3):204-13, 13A. doi: 10.2471/BLT.13.128371  
8  
9 550 11. Zaman MM, Choudhury SR, Ahmed J, et al. Blood glucose and cholesterol levels in adult  
10  
11 551 population of Bangladesh: Results from STEPS 2006 survey. *Indian heart journal*  
12  
13 552 2016;68(1):52-6. doi: 10.1016/j.ihj.2015.06.031  
14  
15 553 12. NCD Global Monitoring Framework: World Health Organization; 2017 [Available from:  
16  
17 554 [http://www.who.int/nmh/global\\_monitoring\\_framework/en/](http://www.who.int/nmh/global_monitoring_framework/en/) accessed 09/29 2017.  
18  
19 555 13. Global action plan for the prevention and control of noncommunicable diseases 2013-2020.  
20  
21 556 Geneva, Switzerland: World Health Organization, 2013.  
22  
23 557 14. Siddique MKB, Islam SMS, Banik PC, et al. Diabetes knowledge and utilization of  
24  
25 558 healthcare services among patients with type 2 diabetes mellitus in Dhaka, Bangladesh.  
26  
27 559 *BMC health services research* 2017;17(1):586. doi: 10.1186/s12913-017-2542-3  
28  
29 560 15. Shariful Islam SM, Lechner A, Ferrari U, et al. Healthcare use and expenditure for diabetes  
30  
31 561 in Bangladesh. *BMJ Glob Health* 2017;2(1):e000033. doi: 10.1136/bmjgh-2016-000033  
32  
33 562 16. Haghparast-Bidgoli H, Shaha SK, Kuddus A, et al. Protocol of economic evaluation and  
34  
35 563 equity impact analysis of mHealth and community groups for prevention and control of  
36  
37 564 diabetes in rural Bangladesh in a three-arm cluster randomised controlled trial. *BMJ*  
38  
39 565 *open* 2018;8(8):e022035. doi: 10.1136/bmjopen-2018-022035  
40  
41 566 17. Islam JY, Zaman MM, Haq SA, et al. Epidemiology of hypertension among Bangladeshi  
42  
43 567 adults using the 2017 ACC/AHA Hypertension Clinical Practice Guidelines and Joint  
44  
45 568 National Committee 7 Guidelines. *Journal of human hypertension* 2018;32(10):668-80.  
46  
47 569 doi: 10.1038/s41371-018-0087-5  
48  
49 570 18. Chronic Disease and Health Promotion: STEP wise approach to surveillance (STEPS).  
50  
51 571 Geneva: World Health Organization.  
52  
53  
54  
55  
56  
57  
58  
59  
60



- 1  
2  
3 572 19. Population and Housing Census 2001, updated in 2009. Dhaka, Bangladesh: Bangladesh  
4 Bureau of Statistics 2009.  
5 573  
6  
7 574 20. Goycochea-Robles MV, Sanin LH, Moreno-Montoya J, et al. Validity of the COPCORD core  
8 questionnaire as a classification tool for rheumatic diseases. *J Rheumatol Suppl*  
9 575  
10 576 2011;86:31-5. doi: 10.3899/jrheum.100955  
11  
12  
13 577 21. Guidelines for Care of Type 2 Diabetes Mellitus in Bangladesh. Dhaka, Bangladesh:  
14 BIRDEM Clinical Research Group, 2003.  
15 578  
16 579 22. American Diabetes A. 2. Classification and Diagnosis of Diabetes. *Diabetes care*  
17 2017;40(Suppl 1):S11-S24. doi: 10.2337/dc17-S005  
18 580  
19  
20 581 23. Moniruzzaman M, Mostafa Zaman M, Islalm MS, et al. Physical activity levels in  
21 Bangladeshi adults: results from STEPS survey 2010. *Public health* 2016;137:131-8. doi:  
22 582 10.1016/j.puhe.2016.02.028  
23 583  
24 584 24. A global brief on Hypertension: Silent Killer, global public health crisis. Geneva, Switzerland:  
25 World Health Organization, 2013.  
26 585  
27  
28 586 25. Ahmad OB, Boschi-Pinto C, Lopez AD, et al. Age Standardization of Rates: A New WHO  
29 Standard. GPE Discussion Paper Series: No31 Geneva, Switzerland: World Health  
30 587 Organization, 2001.  
31 588  
32  
33 589 26. World (WHO 2000-2025) Standard Rockville, MD: National Cancer Institute: Surveillance,  
34 Epidemiology, and End Results Program; 2017 [Available from:  
35 590 <https://seer.cancer.gov/stdpopulations/world.who.html> accessed December 17 2017.  
36 591  
37 592 27. Coutinho LM, Scazufca M, Menezes PR. Methods for estimating prevalence ratios in cross-  
38 sectional studies. *Revista de saude publica* 2008;42(6):992-8.  
39 593  
40  
41 594 28. Behrens T, Taeger D, Wellmann J, et al. Different methods to calculate effect estimates in  
42 cross-sectional studies. A comparison between prevalence odds ratio and prevalence  
43 595 ratio. *Methods Inf Med* 2004;43(5):505-9.  
44 596  
45  
46  
47  
48  
49  
50  
51  
52  
53  
54  
55  
56  
57  
58  
59  
60

- 1  
2  
3 597 29. Barros AJ, Hirakata VN. Alternatives for logistic regression in cross-sectional studies: an  
4  
5 598 empirical comparison of models that directly estimate the prevalence ratio. *BMC medical*  
6  
7 599 *research methodology* 2003;3:21. doi: 10.1186/1471-2288-3-21  
8  
9 600 30. Hussain A, Rahim MA, Azad Khan AK, et al. Type 2 diabetes in rural and urban population:  
10  
11 601 diverse prevalence and associated risk factors in Bangladesh. *Diabetic medicine : a*  
12  
13 602 *journal of the British Diabetic Association* 2005;22(7):931-6. doi: 10.1111/j.1464-  
14  
15 603 5491.2005.01558.x  
16  
17 604 31. Rahman M, Zaman MM, Islam JY, et al. Prevalence, treatment patterns, and risk factors of  
18  
19 605 hypertension and pre-hypertension among Bangladeshi adults. *Journal of human*  
20  
21 606 *hypertension* 2017 doi: 10.1038/s41371-017-0018-x  
22  
23 607 32. Alam DS, Talukder SH, Chowdhury MA, et al. Overweight and abdominal obesity as  
24  
25 608 determinants of undiagnosed diabetes and pre-diabetes in Bangladesh. *BMC Obes*  
26  
27 609 2016;3:19. doi: 10.1186/s40608-016-0099-z  
28  
29 610 33. Tareque MI, Koshio A, Tiedt AD, et al. Are the rates of hypertension and diabetes higher in  
30  
31 611 people from lower socioeconomic status in Bangladesh? Results from a nationally  
32  
33 612 representative survey. *PloS one* 2015;10(5):e0127954. doi:  
34  
35 613 10.1371/journal.pone.0127954  
36  
37 614 34. Biswas T, Islam MS, Linton N, et al. Socio-Economic Inequality of Chronic Non-  
38  
39 615 Communicable Diseases in Bangladesh. *PloS one* 2016;11(11):e0167140. doi:  
40  
41 616 10.1371/journal.pone.0167140  
42  
43 617 35. Gaziano TA, Abrahams-Gessel S, Denman CA, et al. An assessment of community health  
44  
45 618 workers' ability to screen for cardiovascular disease risk with a simple, non-invasive risk  
46  
47 619 assessment instrument in Bangladesh, Guatemala, Mexico, and South Africa: an  
48  
49 620 observational study. *The Lancet Global health* 2015;3(9):e556-63. doi: 10.1016/S2214-  
50  
51 621 109X(15)00143-6  
52  
53  
54  
55  
56  
57  
58  
59  
60

**Table 1: Background Characteristics of Bangladeshi adult participants, 2015 (n = 1819)**

| Characteristic                       | Total (n = 1819) |      |      | Urban (n = 708) |     |      | Rural (n = 1111) |     |      |
|--------------------------------------|------------------|------|------|-----------------|-----|------|------------------|-----|------|
|                                      | Mean (SD)        | n    | %    | Mean (SD)       | n   | %    | Mean (SD)        | n   | %    |
| Gender                               |                  |      |      |                 |     |      |                  |     |      |
| Male                                 |                  | 892  | 49.0 |                 | 345 | 48.7 |                  | 547 | 49.2 |
| Female                               |                  | 927  | 50.9 |                 | 363 | 51.3 |                  | 564 | 50.8 |
| Age(years)                           | 40.5 (14.7)      |      |      | 39.1 (13.9)     |     |      | 41.4 (15.1)      |     |      |
| Education (Years) <sup>a</sup>       | 5 (0 - 9)        |      |      | 8 (3-12)        |     |      | 4 (0-8)          |     |      |
| Marital Status                       |                  |      |      |                 |     |      |                  |     |      |
| Never Married                        |                  | 110  | 6.1  |                 | 54  | 7.6  |                  | 56  | 4.9  |
| Married                              |                  | 1601 | 88.0 |                 | 619 | 87.4 |                  | 982 | 88.4 |
| Separated/Divorced/Widowed           |                  | 108  | 5.9  |                 | 35  | 4.9  |                  | 73  | 6.5  |
| Occupation                           |                  |      |      |                 |     |      |                  |     |      |
| Professional employment <sup>b</sup> |                  | 279  | 15.2 |                 | 189 | 26.7 |                  | 90  | 8.1  |
| Unemployed/retired                   |                  | 98   | 5.3  |                 | 43  | 6.1  |                  | 55  | 4.9  |
| Industrial worker/Day Laborer        |                  | 483  | 26.6 |                 | 120 | 16.9 |                  | 363 | 32.7 |
| Housewife                            |                  | 726  | 39.9 |                 | 247 | 34.9 |                  | 479 | 43.2 |
| Other <sup>c</sup>                   |                  | 232  | 12.8 |                 | 109 | 15.4 |                  | 123 | 11.1 |
| Wealth Index <sup>d</sup>            |                  |      |      |                 |     |      |                  |     |      |
| 1st Wealth Quartile                  |                  | 407  | 22.4 |                 | 110 | 15.5 |                  | 297 | 26.7 |
| 2nd Wealth Quartile                  |                  | 533  | 29.3 |                 | 171 | 24.2 |                  | 362 | 32.6 |
| 3rd Wealth Quartile                  |                  | 429  | 23.6 |                 | 179 | 25.3 |                  | 250 | 22.5 |
| 4th Wealth Quartile                  |                  | 450  | 24.7 |                 | 248 | 35.0 |                  | 202 | 18.2 |
| Tobacco Use <sup>e</sup>             |                  |      |      |                 |     |      |                  |     |      |
| Never                                |                  | 859  | 47.2 |                 | 389 | 54.9 |                  | 470 | 42.3 |
| Current Use                          |                  | 821  | 45.1 |                 | 268 | 37.9 |                  | 553 | 49.8 |
| Past Use                             |                  | 139  | 7.6  |                 | 51  | 7.2  |                  | 88  | 7.9  |
| Smoking Tobacco Use <sup>f</sup>     |                  |      |      |                 |     |      |                  |     |      |
| Every day / Occasionally             |                  | 494  | 27.2 |                 | 169 | 23.9 |                  | 325 | 29.3 |
| Past Use                             |                  | 104  | 5.7  |                 | 38  | 5.4  |                  | 66  | 5.9  |
| Never                                |                  | 1221 | 67.1 |                 | 501 | 70.8 |                  | 720 | 64.8 |
| Smokeless Tobacco Use <sup>g</sup>   |                  |      |      |                 |     |      |                  |     |      |
| Every day / Occasionally             |                  | 529  | 29.1 |                 | 150 | 21.2 |                  | 379 | 34.1 |
| Past Use                             |                  | 51   | 2.8  |                 | 21  | 2.9  |                  | 30  | 2.7  |
| Never                                |                  | 1239 | 68.1 |                 | 537 | 75.9 |                  | 702 | 63.2 |
| Physical Activity <sup>h</sup>       |                  |      |      |                 |     |      |                  |     |      |
| Vigorous                             |                  | 1268 | 69.7 |                 | 445 | 62.9 |                  | 823 | 74.1 |
| Moderate                             |                  | 464  | 25.5 |                 | 234 | 33.1 |                  | 230 | 20.7 |
| Low                                  |                  | 87   | 4.7  |                 | 29  | 4.1  |                  | 58  | 5.2  |

|   |                                 |              |              |              |
|---|---------------------------------|--------------|--------------|--------------|
| 1 | Body Mass Index <sup>i</sup>    | 22.1 (4.1)   | 23.3 (4.5)   | 21.3 (3.7)   |
| 2 | Waist Circumference (cm)        | 78.4 (11.6)  | 81.8 (12.6)  | 76.2 (10.3)  |
| 3 | Blood Pressure                  |              |              |              |
| 4 | Systolic Blood Pressure (mmHg)  | 116.1 (17.1) | 117.9 (16.6) | 115.0 (17.3) |
| 5 | Diastolic Blood Pressure (mmHg) | 76.1 (10.5)  | 77.9 (10.9)  | 74.9 (10.1)  |
| 6 | Blood Glucose Level (mmol/l)    | 6.4 (2.4)    | 6.6 (2.9)    | 6.3 (2.1)    |

8 Abbreviations: SD, standard deviation

9 <sup>a</sup> Calculated median and interquartile range for education as the data are skewed

10 <sup>b</sup> Professional occupation includes: Field staff, police officer, guard, doctor, engineer, professional, business man, desk job

11 <sup>c</sup> Other occupation includes: Shop keeper, weavers, driver, student, beggar, cook, carpenter, tailor, migrant workers and fishermen

12 <sup>d</sup> Wealth index was calculated using principal component analysis using data collected on household ownership of the following items: electricity, flushable toilet, land phone, cell phone, television, radio, refrigerator, private car, motor cycle, washing machine, bicycle, sewing machine, almirah/wardrobe, table, bed, chair/bench, watch/clock, as well as, type of main material used to build their homes roof, walls and floor

13 <sup>e</sup> Includes both smokeless tobacco and smoke tobacco

14 <sup>f</sup> Smoking tobacco use includes cigarettes, biri, hookah, etc.

15 <sup>g</sup> Smokeless tobacco use includes jodda, paan, white leaf, etc.

16 <sup>h</sup> Measured in MET-minutes; 1 MET stands for the amount of oxygen you consume and the number of calories you burn at rest.

17 <sup>i</sup> Body mass index (BMI) calculated by weight in kilogram divided by height in meter squared

**Table 2: Determinants of raised blood glucose among Bangladeshi adults, 2015 (n = 1819)**

| Characteristic                     | Total (n = 1819)                   |                                   | Urban (n = 708)                    |                                   | Rural (n = 1111)                   |                                   |
|------------------------------------|------------------------------------|-----------------------------------|------------------------------------|-----------------------------------|------------------------------------|-----------------------------------|
|                                    | Diabetes <sup>a</sup> Prevalence % | Adjusted PR <sup>b</sup> (95% CI) | Diabetes <sup>a</sup> Prevalence % | Adjusted OR <sup>b</sup> (95% CI) | Diabetes <sup>a</sup> Prevalence % | Adjusted OR <sup>b</sup> (95% CI) |
| <b>Area</b>                        |                                    |                                   |                                    |                                   |                                    |                                   |
| Urban                              | 9.8                                | Ref.                              | -                                  | -                                 | -                                  | -                                 |
| Rural                              | 2.8                                | 0.44 (0.28 – 0.68)                | -                                  | -                                 | -                                  | -                                 |
| <b>Gender</b>                      |                                    |                                   |                                    |                                   |                                    |                                   |
| Male                               | 4.9                                | Ref.                              | 7.5                                | Ref.                              | 3.3                                | Ref.                              |
| Female                             | 5.9                                | 1.05 (0.71 – 1.54)                | 11.9                               | 1.26 (0.80 – 1.99)                | 2.2                                | 0.61 (0.29 – 1.28)                |
| <b>Age (years)</b>                 |                                    |                                   |                                    |                                   |                                    |                                   |
| 18 - 29                            | 2.5                                | Ref.                              | 2.5                                | Ref.                              | 2.5                                | Ref.                              |
| 30 - 44                            | 4.9                                | 1.48 (0.78 – 2.79)                | 8.4                                | 2.55 (1.01 – 6.41)                | 2.5                                | 0.76 (0.30 – 1.93)                |
| 45 - 54                            | 7.4                                | 2.18 (1.10– 4.31)                 | 15.5                               | 4.38 (1.62 – 11.59)               | 2.8                                | 0.67 (0.25 – 1.83)                |
| ≥ 55                               | 8.8                                | 1.92 (0.95 – 3.86)                | 19.3                               | 3.92 (1.48 – 10.39)               | 3.4                                | 0.53 (0.17 – 1.67)                |
| <b>Educational Status</b>          |                                    |                                   |                                    |                                   |                                    |                                   |
| No Education                       | 3.4                                | Ref.                              | 7.0                                | Ref.                              | 2.1                                | Ref.                              |
| Primary Education                  | 3.7                                | 1.00 (0.53 – 1.86)                | 7.6                                | 1.00 (0.44 – 2.30)                | 2.1                                | 0.84 (0.30 – 2.30)                |
| Secondary Education                | 6.9                                | 1.67 (0.95 – 2.93)                | 12.1                               | 1.94 (0.95 – 3.97)                | 2.9                                | 1.01 (0.40 – 2.54)                |
| Above Secondary Education          | 9.8                                | 1.48 (0.77 – 2.84)                | 10.4                               | 1.54 (0.71 – 3.33)                | 8.1                                | 2.24 (0.68 – 7.41)                |
| <b>Wealth Index<sup>c</sup></b>    |                                    |                                   |                                    |                                   |                                    |                                   |
| 1st Wealth Quartile                | 7.7                                | 2.58 (1.57 – 4.24)                | 18.9                               | 3.18 (1.80 – 5.62)                | 3.6                                | 1.37 (0.53 – 3.49)                |
| 2nd Wealth Quartile                | 4.3                                | 1.23 (0.71 – 2.14)                | 9.4                                | 1.50 (0.82 – 2.77)                | 1.9                                | 0.70 (0.24 – 2.05)                |
| 3rd Wealth Quartile                | 3.7                                | 0.86 (0.47 – 1.58)                | 6.0                                | 0.96 (0.48 – 1.92)                | 2.0                                | 0.55 (0.18 – 1.73)                |
| 4th Wealth Quartile                | 6.6                                | Ref.                              | 8.8                                | Ref.                              | 3.9                                | Ref.                              |
| <b>Blood Pressure</b>              |                                    |                                   |                                    |                                   |                                    |                                   |
| Normal Blood Pressure              | 1.9                                | Ref.                              | 3.5                                | Ref.                              | 1.1                                | Ref.                              |
| Pre-Hypertension <sup>d</sup>      | 5.7                                | 1.74 (1.00 – 3.01)                | 8.3                                | 1.37 (0.69 – 2.74)                | 3.8                                | 2.32(0.91 – 5.92)                 |
| Hypertension <sup>e</sup>          | 18.9                               | 3.57 (2.01 – 6.34)                | 27.4                               | 2.65 (1.30 – 5.38)                | 8.8                                | 5.39(1.94 –14.96)                 |
| <b>Physical Activity</b>           |                                    |                                   |                                    |                                   |                                    |                                   |
| Vigorous                           | 3.9                                | Ref.                              | 6.9                                | Ref.                              | 2.3                                | Ref.                              |
| Moderate                           | 8.2                                | 1.18 (0.78 – 1.77)                | 13.8                               | 1.22 (0.77 – 1.93)                | 2.1                                | 0.65 (0.22 – 1.88)                |
| Low                                | 14.9                               | 3.04 (1.69 – 5.47)                | 20.7                               | 3.01 (1.42 – 6.38)                | 12.1                               | 2.58 (0.95 – 7.04)                |
| <b>Body Mass Index<sup>f</sup></b> |                                    |                                   |                                    |                                   |                                    |                                   |
| Underweight (<18.5)                | 1.1                                | 0.37 (0.12 – 1.13)                | 1.8                                | 0.38 (0.07 – 1.95)                | 0.7                                | 0.42 (0.09 – 2.02)                |

|   |                                |      |                    |      |                    |     |                    |
|---|--------------------------------|------|--------------------|------|--------------------|-----|--------------------|
| 1 |                                |      |                    |      |                    |     |                    |
| 2 | Normal (18.5 - 25)             | 4.7  | Ref.               | 8.2  | Ref.               | 2.8 | Ref.               |
| 3 | Overweight (25.1 - 30)         | 10.4 | 1.06 (0.68 – 1.65) | 14.0 | 1.05 (0.61 – 1.80) | 6.2 | 1.22 (0.51 – 2.91) |
| 4 | Obese (>30)                    | 20.9 | 1.49 (0.87 – 2.57) | 26.5 | 1.46 (0.81 – 2.64) | 5.6 | 0.95 (0.12 – 7.60) |
| 5 | Waist Circumference (cm)       |      |                    |      |                    |     |                    |
| 6 | Normal <sup>g</sup>            | 2.3  | Ref.               | 3.8  | Ref.               | 1.6 | Ref.               |
| 7 | Abdominally Obese <sup>h</sup> | 13.3 | 2.49 (1.53 – 4.07) | 18.1 | 2.54 (1.35 – 4.77) | 6.8 | 2.95 (1.32 – 6.58) |

8 Abbreviations: PR = prevalence ratio, CI = confidence intervals, Ref = referent category

9 <sup>a</sup> Raised blood glucose was defined as a capillary blood glucose level greater than or equal to 11.1 mmol/L or self-reported diabetes medication use

10 <sup>b</sup> Model adjusted for all variables included in table: sex, age, education, wealth index, blood pressure, body mass index, self-reported physical activity, and waist circumference

11 <sup>c</sup> Wealth index was calculated using principal component analysis using data collected on household ownership of the following items: electricity, flushable toilet, land phone, cell phone, television, radio, refrigerator, private car, motor cycle, washing machine, bicycle, sewing machine, almirah/wardrobe, table, bed, chair/bench, watch/clock, as well as, type of main material used to build their homes roof, walls and floor

12 <sup>d</sup> Pre-Hypertension was defined as SBP  $\geq$ 120 mmHg but  $<$  140 mmHg and/or DBP  $\geq$  80 mmHg but  $<$ 90 mmHg and not taking anti-hypertensive medication at the time of the survey

13 <sup>e</sup> Hypertension was defined as systolic blood pressure (SBP) was  $\geq$ 140 mmHg (millimeters of mercury) and/or, diastolic blood pressure (DBP)  $\geq$ 90 mmHg and/or taking any-hypertensive medication

14 <sup>f</sup> Body mass index (BMI) calculated by weight in kilogram divided by height in meter squared

15 <sup>g</sup> Defined as  $<$ 90 cm M;  $<$ 80 cm F

16 <sup>h</sup> Defined as  $\geq$ 90 cm M;  $\geq$ 80 cm F

1  
2  
3  
4  
5  
6  
7  
8  
9  
10  
11  
12  
13  
14  
15  
16  
17  
18  
19  
20  
21  
22  
23  
24  
25  
26  
27  
28  
29  
30  
31  
32  
33  
34  
35  
36  
37  
38  
39  
40  
41  
42  
43  
44  
45  
46  
47  
48  
49  
50  
51  
52  
53  
54  
55  
56  
57  
58  
59  
60

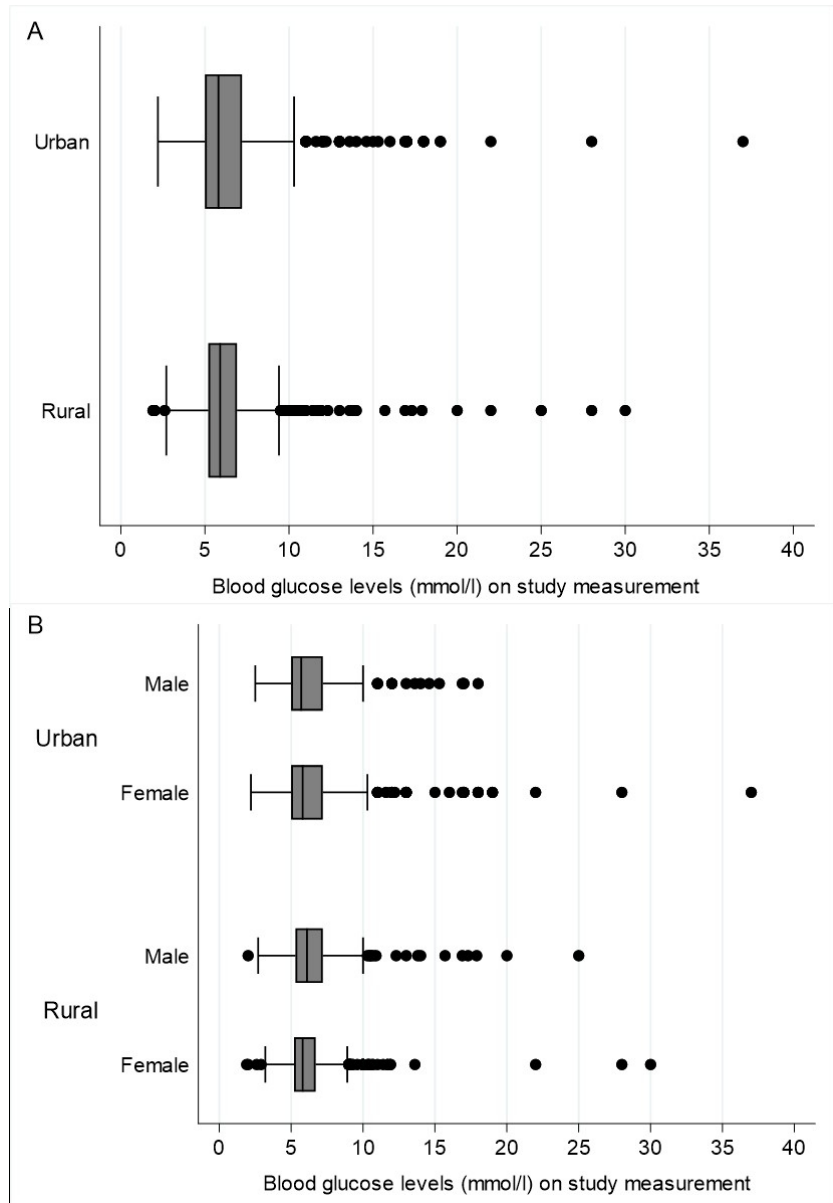

Figure 1: Urban and Rural differences in distribution of blood glucose levels based on random capillary blood measurement among (A) All Participants, and (B) Men and Women (n = 1819)

140x202mm (150 x 150 DPI)

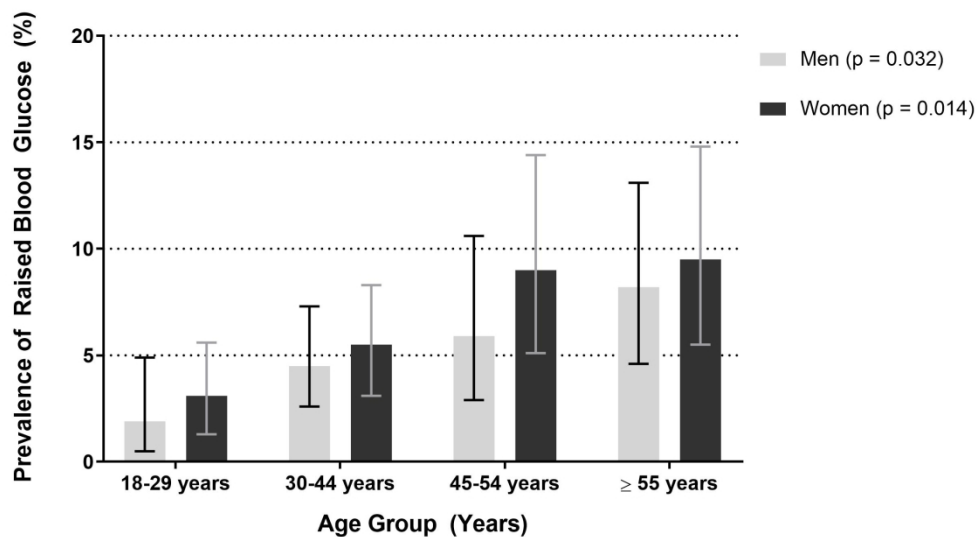

Figure 2: Prevalence of raised blood glucose among Bangladeshi adults aged 18 years and above by sex and age group, 2015 (n = 1819)

209x117mm (300 x 300 DPI)



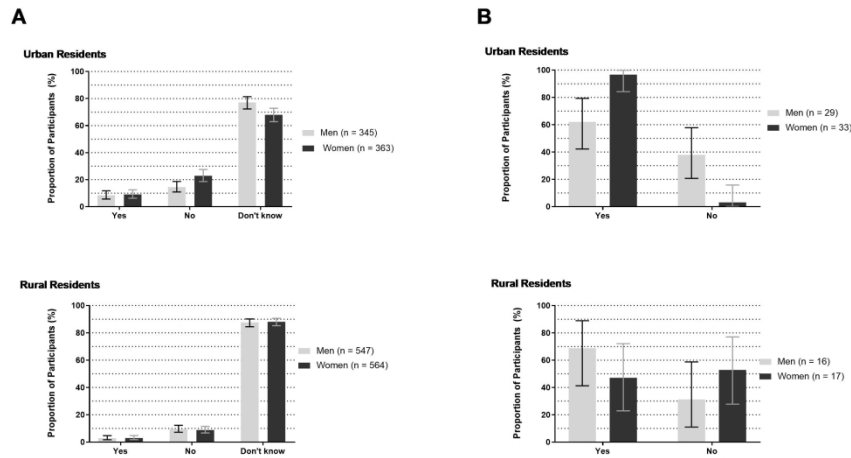

Figure 3: Bangladeshi adults aged 18 years and above with (A) self-reported diabetes and (B) self-reported diabetics on diabetes medications, 2015

245x120mm (300 x 300 DPI)

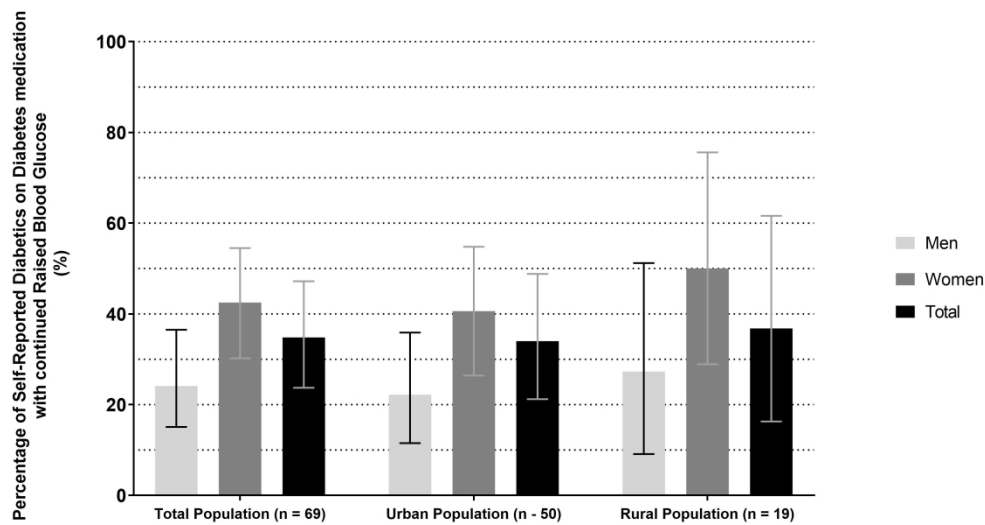

Figure 4: Self-reported diabetics aged 18 years or older who take diabetes medication with raised blood glucose on study measurement ( $\geq 11.0\text{mmol/L}$ )

286x154mm (300 x 300 DPI)

**STROBE 2007 (v4) Statement—Checklist of items that should be included in reports of *cross-sectional studies***

| Section/Topic                | Item # | Recommendation                                                                                                                                                                       | Reported on page # |
|------------------------------|--------|--------------------------------------------------------------------------------------------------------------------------------------------------------------------------------------|--------------------|
| <b>Title and abstract</b>    | 1      | (a) Indicate the study's design with a commonly used term in the title or the abstract                                                                                               | 2                  |
|                              |        | (b) Provide in the abstract an informative and balanced summary of what was done and what was found                                                                                  | 2-3                |
| <b>Introduction</b>          |        |                                                                                                                                                                                      |                    |
| Background/rationale         | 2      | Explain the scientific background and rationale for the investigation being reported                                                                                                 | 5-6                |
| Objectives                   | 3      | State specific objectives, including any prespecified hypotheses                                                                                                                     | 6                  |
| <b>Methods</b>               |        |                                                                                                                                                                                      |                    |
| Study design                 | 4      | Present key elements of study design early in the paper                                                                                                                              | 6                  |
| Setting                      | 5      | Describe the setting, locations, and relevant dates, including periods of recruitment, exposure, follow-up, and data collection                                                      | 7                  |
| Participants                 | 6      | (a) Give the eligibility criteria, and the sources and methods of selection of participants                                                                                          | 6                  |
| Variables                    | 7      | Clearly define all outcomes, exposures, predictors, potential confounders, and effect modifiers. Give diagnostic criteria, if applicable                                             | 8-9                |
| Data sources/<br>measurement | 8*     | For each variable of interest, give sources of data and details of methods of assessment (measurement). Describe comparability of assessment methods if there is more than one group | 7-10               |
| Bias                         | 9      | Describe any efforts to address potential sources of bias                                                                                                                            | 6-7 & 11           |
| Study size                   | 10     | Explain how the study size was arrived at                                                                                                                                            | 7                  |
| Quantitative variables       | 11     | Explain how quantitative variables were handled in the analyses. If applicable, describe which groupings were chosen and why                                                         | 9-10               |
| Statistical methods          | 12     | (a) Describe all statistical methods, including those used to control for confounding                                                                                                | 11                 |
|                              |        | (b) Describe any methods used to examine subgroups and interactions                                                                                                                  | 11                 |
|                              |        | (c) Explain how missing data were addressed                                                                                                                                          | N/A                |
|                              |        | (d) If applicable, describe analytical methods taking account of sampling strategy                                                                                                   | N/A                |
|                              |        | (e) Describe any sensitivity analyses                                                                                                                                                | N/A                |
| <b>Results</b>               |        |                                                                                                                                                                                      |                    |

|                          |     |                                                                                                                                                                                                              |       |
|--------------------------|-----|--------------------------------------------------------------------------------------------------------------------------------------------------------------------------------------------------------------|-------|
| Participants             | 13* | (a) Report numbers of individuals at each stage of study—eg numbers potentially eligible, examined for eligibility, confirmed eligible, included in the study, completing follow-up, and analysed            | 7     |
|                          |     | (b) Give reasons for non-participation at each stage                                                                                                                                                         | 7     |
|                          |     | (c) Consider use of a flow diagram                                                                                                                                                                           | N/A   |
| Descriptive data         | 14* | (a) Give characteristics of study participants (eg demographic, clinical, social) and information on exposures and potential confounders                                                                     | 12    |
|                          |     | (b) Indicate number of participants with missing data for each variable of interest                                                                                                                          | N/A   |
| Outcome data             | 15* | Report numbers of outcome events or summary measures                                                                                                                                                         |       |
| Main results             | 16  | (a) Give unadjusted estimates and, if applicable, confounder-adjusted estimates and their precision (eg, 95% confidence interval). Make clear which confounders were adjusted for and why they were included | 12    |
|                          |     | (b) Report category boundaries when continuous variables were categorized                                                                                                                                    | 9     |
|                          |     | (c) If relevant, consider translating estimates of relative risk into absolute risk for a meaningful time period                                                                                             | N/A   |
| Other analyses           | 17  | Report other analyses done—eg analyses of subgroups and interactions, and sensitivity analyses                                                                                                               | 11    |
| <b>Discussion</b>        |     |                                                                                                                                                                                                              |       |
| Key results              | 18  | Summarise key results with reference to study objectives                                                                                                                                                     | 12-14 |
| Limitations              | 19  | Discuss limitations of the study, taking into account sources of potential bias or imprecision. Discuss both direction and magnitude of any potential bias                                                   | 17-18 |
| Interpretation           | 20  | Give a cautious overall interpretation of results considering objectives, limitations, multiplicity of analyses, results from similar studies, and other relevant evidence                                   | 15-18 |
| Generalisability         | 21  | Discuss the generalisability (external validity) of the study results                                                                                                                                        | 17    |
| <b>Other information</b> |     |                                                                                                                                                                                                              |       |
| Funding                  | 22  | Give the source of funding and the role of the funders for the present study and, if applicable, for the original study on which the present article is based                                                | 20    |

\*Give information separately for cases and controls in case-control studies and, if applicable, for exposed and unexposed groups in cohort and cross-sectional studies.

**Note:** An Explanation and Elaboration article discusses each checklist item and gives methodological background and published examples of transparent reporting. The STROBE checklist is best used in conjunction with this article (freely available on the Web sites of PLoS Medicine at <http://www.plosmedicine.org/>, Annals of Internal Medicine at <http://www.annals.org/>, and Epidemiology at <http://www.epidem.com/>). Information on the STROBE Initiative is available at [www.strobe-statement.org](http://www.strobe-statement.org).

# BMJ Open

## Prevalence and determinants of hyperglycemia among adults in Bangladesh: results from a population-based national survey

|                                 |                                                                                                                                                                                                                                                                                                                                                                                                                                                                                                                                          |
|---------------------------------|------------------------------------------------------------------------------------------------------------------------------------------------------------------------------------------------------------------------------------------------------------------------------------------------------------------------------------------------------------------------------------------------------------------------------------------------------------------------------------------------------------------------------------------|
| Journal:                        | <i>BMJ Open</i>                                                                                                                                                                                                                                                                                                                                                                                                                                                                                                                          |
| Manuscript ID                   | bmjopen-2019-029674.R1                                                                                                                                                                                                                                                                                                                                                                                                                                                                                                                   |
| Article Type:                   | Research                                                                                                                                                                                                                                                                                                                                                                                                                                                                                                                                 |
| Date Submitted by the Author:   | 17-May-2019                                                                                                                                                                                                                                                                                                                                                                                                                                                                                                                              |
| Complete List of Authors:       | Islam, Jessica; World Health Organization Country Office for Bangladesh, ; University of North Carolina at Chapel Hill Gillings School of Global Public Health, Department of Epidemiology<br>Zaman, MM; World Health Organization, Dhaka, Bangladesh,<br>Bhuiyan, Mahfuz; World Health Organization Country Office for Bangladesh<br>Haq, Syed; Bangabandhu Sheikh Mujib Medical University, Rheumatology<br>Ahmed, Shamim; Bangabandhu Sheikh Mujib Medical University<br>Al-Qadir, Zahid; Bangabandhu Sheikh Mujib Medical University |
| <b>Primary Subject Heading</b>: | Epidemiology                                                                                                                                                                                                                                                                                                                                                                                                                                                                                                                             |
| Secondary Subject Heading:      | Diabetes and endocrinology, Global health                                                                                                                                                                                                                                                                                                                                                                                                                                                                                                |
| Keywords:                       | non-communicable diseases, chronic disease, raised blood glucose, Bangladesh                                                                                                                                                                                                                                                                                                                                                                                                                                                             |
|                                 |                                                                                                                                                                                                                                                                                                                                                                                                                                                                                                                                          |

SCHOLARONE™  
Manuscripts

1  
2  
3 1 Prevalence and determinants of hyperglycemia among adults in Bangladesh: results from a  
4  
5 2  
6  
7  
8  
9

10 3 Jessica Y. Islam<sup>1,2</sup>, M. Mostafa Zaman<sup>\*2</sup>, Mahfuzur Rahman Bhuiyan<sup>2</sup>, Syed Atiqul Haq<sup>3</sup>,  
11 4 Shamim Ahmed<sup>3</sup>, Zahid- Al- Quadir<sup>3</sup>

12  
13 5 <sup>1</sup>Department of Epidemiology, UNC Gillings School of Global Public Health, Chapel Hill, NC;  
14  
15 6 Email: [islamjy@email.unc.edu](mailto:islamjy@email.unc.edu)

16  
17  
18 7 <sup>2</sup>World Health Organization, Dhaka, Bangladesh; Email: [zamanm@who.int](mailto:zamanm@who.int); Email:  
19  
20 8 [mahfuzdoc@gmail.com](mailto:mahfuzdoc@gmail.com)

21  
22  
23 9 <sup>3</sup>Department of Rheumatology, Bangabandhu Sheikh Mujib Medical University, Shahbag,  
24  
25 10 Dhaka, Bangladesh. Email: [haqsyedatiqul@gmail.com](mailto:haqsyedatiqul@gmail.com); Email: [dr\\_shamim\\_ahmed@yahoo.com](mailto:dr_shamim_ahmed@yahoo.com);  
26  
27 11 Email: [drzahid1981@yahoo.com](mailto:drzahid1981@yahoo.com)

28  
29  
30 12 **Corresponding Author:**

31 13 Jessica Yasmine Islam, MPH  
32 14 The University of North Carolina at Chapel Hill  
33 15 Gillings School of Global Public Health  
34 16 Department of Epidemiology  
35 17 Chapel Hill, NC, USA 27599-7400  
36 18 Email: [islamjy@email.unc.edu](mailto:islamjy@email.unc.edu)  
37  
38  
39  
40

41 21 **Manuscript word count: 4,200**  
42  
43  
44  
45  
46  
47  
48  
49  
50  
51  
52  
53  
54  
55  
56  
57  
58  
59  
60

## 30 **Abstract**

31 Objectives: With the increasing burden of non-communicable diseases in low- and middle-  
32 income countries, biological risk factors such as hyperglycemia are a major public health  
33 concern in Bangladesh. Hyperglycemia is an excess of glucose in the bloodstream and is often  
34 associated with type-2 diabetes mellitus. Nationally representative data of hyperglycemia  
35 prevalence starting from age  $\geq 18$  years are currently unavailable for Bangladeshi adults. The  
36 objective of this study was to assess the prevalence and determinants of hyperglycemia among  
37 adults in Bangladesh aged  $\geq 18$  years.

38  
39 Study Design: Cross-sectional, population-based study

40  
41 Setting and Participants: Data for this analysis were collected from a population-based  
42 nationally representative sample of 1843 adults, aged  $\geq 18$  years, from both urban and rural  
43 areas of Bangladesh. Demographic information, capillary blood glucose, blood pressure, height,  
44 weight, waist circumference, and treatment history were recorded.

45  
46 Primary Outcome Measures: Hyperglycemia was defined as a random capillary blood glucose  
47 level of  $\geq 11.1$  mmol/L (i.e. in the diabetic range) or currently taking medication to control type-2  
48 diabetes, based on self-report.

49  
50 Results: Overall, the prevalence of hyperglycemia was 5.5% (95% CI: 4.5-6.6) and was  
51 significantly higher among urban (9.8%, 95% CI: 7.7-12.2) than rural residents (2.8%, 95% CI:  
52 1.9-3.9). The age-standardized prevalence of hyperglycemia was 5.6% (95% CI: 4.6-6.8).  
53 Among both urban and rural residents, the associated determinants of hyperglycemia included  
54 hypertension and abdominal obesity. About 5% of the total population self-reported to have

1  
2  
3 55 been previously diagnosed with type-2 diabetes; among these adults, over 25% were not taking  
4  
5 56 medications to control their diabetes.  
6

7 57 Conclusions: Our study found that about 1 out of 20 Bangladeshi adults aged  $\geq 18$  years have  
8  
9 58 hyperglycemia. To control and prevent the development of type-2 diabetes, data from this study  
10  
11 59 can be used to inform public health programming and provide descriptive information on  
12  
13 60 surveillance of progress towards controlling diabetes in Bangladesh.  
14

15  
16 61  
17  
18 62 **Keywords:** non-communicable diseases, Bangladesh, hyperglycemia, diabetes, chronic  
19  
20 63 disease  
21

22 64

23  
24 65

25  
26 66

27  
28 67

29  
30 68

31  
32 69

33  
34 70

35  
36 71

37  
38 72

39  
40 73

41  
42 74

43  
44 75

45  
46 76

47  
48 77

49  
50 78

51  
52 79

53  
54 80  
55  
56  
57  
58  
59  
60



## Article Summary

### Strengths and Limitations of the Study

- This study utilized a multistage, geographically clustered, probability-based sampling approach to produce nationally representative data for Bangladesh.
- Currently, nationally representative data for the prevalence of hyperglycemia in the diabetic range is unavailable for adults aged 18-29 years. A strength of our study is that we included Bangladeshi adults aged 18 years and above to obtain novel data on the prevalence of hyperglycemia, and relevant non-communicable disease risk factors
- We were able to estimate the prevalence of hyperglycemia using capillary blood glucose measured at random. However, we were unable to measure the prevalence of prediabetes and diabetes as we did not obtain blood sugar levels using standardized methods, such as fasting blood glucose or 2-hour post-prandial measurements.
- Due to the cross-sectional nature of the study design, we were unable to assess temporality of risk factors identified and our outcomes of interest.
- We assessed type-2 diabetes medication history based on self-report and we were able to obtain medicine strips or vials records or prescription records of participants to confirm the self-reported data.

## 108 **Background**

109 Globally, diabetes mellitus (DM), characterized by hyperglycemia, is a leading cause of  
110 premature mortality and disability. Globally, almost half of all deaths attributable to high blood  
111 glucose occur before the age of 70 years, and the WHO estimates that diabetes was the  
112 seventh leading cause of mortality in 2016. The global prevalence of DM has been on the rise  
113 over the past several decades<sup>1,2</sup>. Estimates reflect the global prevalence of diabetes has nearly  
114 doubled among adults aged 18 years and above, rising from 4.7% in 1980 to 8.5% in 2014<sup>3</sup>.  
115 This growing burden is most prominent in low- and middle-income countries particularly the  
116 Indian sub-continent<sup>4</sup>, which accounts for close to one-fifth of all diabetes cases worldwide. The  
117 prevalence of diabetes in this region is projected to increase by 71% by 2035<sup>5</sup>. In Bangladesh,  
118 specifically, the International Diabetes Federation projects the prevalence of diabetes will  
119 increase to more than 50% in the next 15 years<sup>5</sup>.

120 The increasing prevalence of diabetes among Bangladeshi adults over the past few  
121 decades has been documented: Based on a meta-analysis of studies conducted from 1995 –  
122 2010, the prevalence of diabetes among Bangladeshi adults aged 30 years and above  
123 increased from 4% in 1995 to 2000 and 5% in 2001 to 2005 to 9% in 2006 to 2010<sup>6</sup>. Studies to  
124 assess the burden of diabetes have been conducted in Bangladesh in both urban and rural  
125 populations over the last decades<sup>7</sup>. However, national data on the prevalence of diabetes or  
126 hyperglycemia in the diabetic range starting at age 18 years are currently unavailable<sup>7-10</sup>. These  
127 data are valuable for monitoring progress made towards one of the nine global non-  
128 communicable disease (NCD) targets of the year 2025, set forth by the World Health  
129 Organization's (WHO) NCD Global Monitoring Framework: To observe a 0% increase in age-  
130 standardized prevalence of hyperglycemia or diabetes among persons aged  $\geq 18$  years<sup>11</sup>. As  
131 such in response to the WHO Global Action Plan for the Prevention and Control of NCDs<sup>12</sup>,  
132 descriptive epidemiological data on the burden of hyperglycemia among adults starting at 18  
133 years are needed to monitor the national progress of interventions implemented to reduce the

1  
2  
3 134 burden of DM in Bangladesh<sup>13-15</sup>. Here, using a nationally representative sample, we present  
4  
5 135 data on prevalence and determinants of hyperglycemia by various sociodemographic factors  
6  
7 136 such as age, sex, and area of residence among Bangladeshi adults aged 18 years and above,  
8  
9 137 residing in both urban and rural areas of the country. Additionally, we explore treatment patterns  
10  
11 138 and control of hyperglycemia among participants in our sample of Bangladeshi adults.  
12  
13  
14 139

## 15 16 140 **Methods**

17  
18 141 Data for this analysis were collected as part of a national assessment of the burden of  
19  
20 142 musculoskeletal disorders in Bangladesh conducted by investigators from the Bangabandhu  
21  
22 143 Sheikh Mujib Medical University (BSMMU) with technical assistance from the WHO Country  
23  
24 144 Office for Bangladesh, as previously described<sup>16</sup>. The study was a population-based cross-  
25  
26 145 sectional study carried out from November to December 2015 and followed the WHO STEP-  
27  
28 146 wise approach to Surveillance of NCD risk factors (STEPS)<sup>17</sup>. The target population of this  
29  
30 147 survey was men and women aged  $\geq 18$  years residing in rural and urban areas of Bangladesh.  
31  
32 148 The exclusion criteria included tourists and the institutionalized, including residents of hospitals,  
33  
34 149 prisons, nursing homes, and army barracks.  
35  
36  
37 150

### 38 39 151 Sampling Methods

40  
41 152 To obtain a population-based sample of Bangladesh, this survey adopted a multistage,  
42  
43 153 geographically clustered, probability-based sampling approach. Population statistics were  
44  
45 154 obtained using the updated national census conducted by the Bangladesh Bureau of Statistics  
46  
47 155 (BBS) in 2009<sup>18</sup>. To obtain our primary sampling unit (PSU), we utilized the following  
48  
49 156 geographical distribution described: In Bangladesh, there are seven divisions, which are the  
50  
51 157 largest administrative units of the country. Each division is divided into several districts (*Zila*)  
52  
53 158 and within each district, there are several sub-districts (*Upazila*). Within sub-districts, *mauzas*  
54  
55 159 and *mahallas* (commonly known as neighborhoods or blocks) are the smallest units within  
56  
57  
58  
59  
60

1  
2  
3 160 defined territories in rural and urban areas respectively. *Mauzas* and *mahallas* were considered  
4  
5 161 the PSU for the study's sampling approach. The households within the *mauzas* and *mahallas*  
6  
7 162 were the secondary sampling units. We utilized the BBS' definition of a household which is as  
8  
9 163 follows: "a dwelling in which persons either related or unrelated were living together and taking  
10  
11 164 food from the same kitchen"<sup>18</sup>.

13 165

### 16 166 Sample size estimation

18 167 The power analysis and sample size calculations were completed based on the  
19  
20 168 standardized approach outlined in the WHO STEPS methodology<sup>17</sup>. Using the WHO STEPS  
21  
22 169 methodology, the minimum number of participants required was 296 in each group (rural males,  
23  
24 170 rural females, urban males, and urban females). Assuming a design effect of 1.5 adjusted within  
25  
26 171 cluster population homogeneity, the necessary sample size was 1776. We assumed a response  
27  
28 172 rate of 90% and determined we would need to contact at least 1973 adults. For simplicity, our  
29  
30 173 target sample size was 2000. Twenty PSUs (8 urban and 12 rural) were randomly selected from  
31  
32 174 7 divisions of the country, with the probability proportional to the population size of each  
33  
34 175 division. In each PSU, 100 consecutive households were selected. The even numbered  
35  
36 176 households were designated as a "male household" and odd numbered households as a  
37  
38 177 "female household." Finally, one male or female was approached to participate from each  
39  
40 178 respective household as designated.

43 179

### 45 180 Data collection

47 181 Through a structured survey, we collected data on the following topics: musculoskeletal  
48  
49 182 disorders<sup>19</sup>, health history, and demographic data such as age, area of residence, education,  
50  
51 183 current (last 12 months) occupation, tobacco use, and physical activity. Physical measurements  
52  
53 184 such as height, weight, waist circumference, blood glucose levels, and blood pressure were  
54  
55 185 collected. To measure blood glucose levels, we obtained random blood glucose samples<sup>3</sup>, per

1  
2  
3 186 the clinical guidelines of diabetes diagnostic criteria of Bangladesh<sup>20</sup>. Capillary blood samples  
4  
5 187 were consistently taken from the index finger of the right arm using a glucometer, namely Accu-  
6  
7 188 chek Advantage (Roche Diagnostics Division, Grenzacherstrasse, Switzerland).  
8

9 189 Each participant's history of diabetes was assessed based on self-report. Specifically,  
10  
11 190 participants were asked: 1. Have you ever been diagnosed with diabetes by a health care  
12  
13 191 professional? 2. If yes, are you receiving treatment for diabetes? Treatment history of diabetes  
14  
15 192 was confirmed by prescription, including medicine strips or insulin injection vials, or medical  
16  
17 193 records. The questionnaire was translated from English to Bengali, adapted and validated per  
18  
19 194 standard procedure. Data collection procedures were standardized across study sites through  
20  
21 195 coordinated training of field staff conducted by epidemiologists, study physicians, and WHO  
22  
23 196 staff members.  
24  
25

26 197 Blood pressure was measured by a trained field interviewer using the LifeSource UA-  
27  
28 198 767+ blood pressure monitor, as recommended by the WHO, and appropriately sized arm cuffs.  
29  
30 199 Blood pressure measurements were consistently taken on each participant's right arm at the  
31  
32 200 level of the heart and elbow-assisted, while the participant was in a seated position. The initial  
33  
34 201 measurement was performed after five minutes of rest. After two minutes, the second  
35  
36 202 measurement was taken. The mean of these two blood pressure readings was utilized as the  
37  
38 203 final blood pressure for each participant.  
39  
40

41 204 Following data collection, participants scheduled a visit with the study research physician  
42  
43 205 within the following five days. The research physician assessed the participant's medical history,  
44  
45 206 either through self-report or using medical records when possible. Study physicians examined  
46  
47 207 each participant to confirm the results of data collection through classical symptom assessment.  
48  
49 208 When necessary, the participant was also evaluated by the divisional investigator for a second  
50  
51 209 opinion of relevant diagnoses.  
52

53  
54 210

55  
56 211 Patient and public involvement  
57

1  
2  
3 212 There was no patient or public involvement in the implementation of this study or interpretation  
4  
5 213 of analytic results.  
6

7 214

9 215 Outcome definitions

11 216 Our primary outcome of interest was the prevalence of hyperglycemia. We utilized the  
12  
13 217 American Diabetes Association (ADA) guidelines to define a diagnosis of hyperglycemia using  
14  
15 218 random or casual plasma glucose test and symptom review by the study physician <sup>21</sup>. An  
16  
17 219 individual was considered to have hyperglycemia if the plasma glucose level was 11.1 mmol/L  
18  
19 220 or higher (i.e. in the diabetic range) and/or if they self-reported to take diabetes medication. Our  
20  
21 221 secondary outcome of interest was the prevalence of self-reported type-2 diabetes mellitus. An  
22  
23 222 individual was categorized as diabetic if they self-reported to have been previously diagnosed  
24  
25 223 with diabetes by a health care provider.  
26  
27

28 224

30 225 Covariates

32 226 The following variables were assessed as covariates for analysis: area of residence,  
33  
34 227 sex, age, education, occupation, wealth index, body mass index (BMI), BP, and waist  
35  
36 228 circumference. Education was categorized into four groups: no education, primary education  
37  
38 229 (completed grade  $\leq 5$ ), secondary education (completed  $\leq$  grade 10), and above secondary  
39  
40 230 education (completed  $\geq$  grade 12). Each participant's occupation was categorized into five  
41  
42 231 groups, including: professional employment (field staff, police officer, guard, doctor, engineer,  
43  
44 232 professional, businessman, desk job), unemployed or retired, industrial worker or day laborer,  
45  
46 233 housewife, and other (shop keeper, weaver, driver, student, beggar, cook, carpenter, tailor,  
47  
48 234 migrant workers and fishermen).  
49

51 235 Data on physical activity was collected based on self-report. First, respondents were  
52  
53 236 asked the number of days they engaged in vigorous, moderate, or light physical activity  
54  
55 237 throughout a typical week. The following definitions were used to define (1) vigorous, (2)

1  
2  
3 238 moderate, and (3) light physical activity, respectively: (1) vigorous activity was defined as any  
4  
5 239 activity that caused a large increase in breathing or heart rate, if continued for at least 10  
6  
7 240 minutes (e.g. running, carrying heavy loads, digging or construction work); (2) moderate activity  
8  
9 241 was defined as any activity that caused a small increase in breathing or heart rate, if continued  
10  
11 242 for at least 10 minutes (brisk walking or carrying light loads); and (3) light physical activity was  
12  
13 243 defined as activities such as office work. Next, we asked participants to estimate how many  
14  
15 244 minutes per day they engaged in the activity. MET-minute was calculated using the STEPS  
16  
17 245 protocol<sup>22</sup> as follows: one minute of light activity was equivalent to 1 MET-minute; one minute in  
18  
19 246 moderate-intensity activities was equivalent to 4 MET-minutes, and one minute of vigorous-  
20  
21 247 intensity was equivalent to 8 MET-minutes. Physical activity was then categorized based on  
22  
23 248 total MET-minutes per week. Participants who spent 3000 or more MET-minutes per week were  
24  
25 249 categorized in the vigorous physical activity group, 600-3000 MET-minutes were categorized as  
26  
27 250 moderate physical activity, and <600 MET-minutes were categorized as low physical activity.

30  
31 251 The wealth index was constructed using principal component analysis. Asset information  
32  
33 252 collected covered information on household ownership of nineteen items, including electricity,  
34  
35 253 flush toilet, land telephone, cell phone, television, radio, refrigerator, car, motorcycle, washing  
36  
37 254 machine, bicycle, sewing machine, wardrobe, table, bed or cot, chair or bench, watch or clock.  
38  
39 255 Additionally, we assessed the main type of material used to build each participant's home (i.e.  
40  
41 256 cement, tin, bamboo, or thatched straw). Each asset was assigned a weight (factor score)  
42  
43 257 generated through principal components analysis, and the resulting asset scores were  
44  
45 258 standardized to a normal distribution with a mean of zero and standard deviation of one. Each  
46  
47 259 household was then assigned a score for each asset, and the scores were summed up;  
48  
49 260 individuals were ranked according to the total score of the household in which they resided. The  
50  
51 261 sample was then divided into quartiles from quartile one (lowest) to quartile four (highest).  
52  
53 262 Using height (centimeters) and weight (kilograms) measurements, we calculated BMI  
54  
55 263 (height/weight<sup>2</sup>). BMI was categorized in the following groups: underweight ( $\leq 18.5$ ), normal



1  
2  
3 264 ( $\leq 25$ ), overweight (25.1-30) and obese ( $>30$ ). Waist circumference was measured in centimeters  
4  
5 265 (cm). Participants were categorized as abdominally obese if waist circumference was 90 cm and  
6  
7 266 above for men, or 80 cm and above for women. Prehypertension was defined as SBP  $\geq 120$   
8  
9 267 mmHg but  $< 140$  mmHg and/or DBP  $\geq 80$  mmHg but  $< 90$  mmHg and not taking antihypertensive  
10  
11 268 medication at the time of the survey. We utilized the WHO's guidelines for cut-off points to  
12  
13 269 define hypertension<sup>23</sup>. An individual was considered to have hypertension if systolic blood  
14  
15 270 pressure (SBP) was  $\geq 140$  mmHg (millimeters of mercury) and/or, diastolic blood pressure (DBP)  
16  
17  $\geq 90$  mmHg, and/or taking antihypertensive medication based on self-report.  
18  
19  
20 272

### 21 22 273 Age-Standardized Prevalence Estimates

23  
24 274 To facilitate comparison of overall hyperglycemia among Bangladeshi adults across  
25  
26 275 global populations with different age compositions we calculated age-standardized prevalence  
27  
28 276 estimates with 95% confidence intervals (CIs) using the WHO's World Standard Population <sup>24</sup>.  
29  
30 277 The World Standards database (WHO 2000-2025) provided population estimates for 18 and 19  
31  
32 278 age groups, as well as single year ages. To derive single ages from the 5-year age group  
33  
34 279 proportions publically available, we used the Beers "Ordinary" Formula<sup>25</sup>. The following formula  
35  
36 280 was utilized for standardization:

37  
38  
39 281  $\sum p_i * w_i / \sum w_i$ , where  $p$  = observed prevalence and  $w$  = world population weight.  
40  
41 282

### 42 43 283 Data Analysis

44  
45 284 Sociodemographic variables were presented with mean and standard deviation (SD) for  
46  
47 285 continuous variables, and using proportions for categorical variables. For bivariate analyses,  
48  
49 286 study participants were divided by sex and into four age groups (18-29, 30-44, 45-54 and  $\geq 55$   
50  
51 287 years). We calculated the prevalence of our primary outcome by key demographic variables and  
52  
53 288 calculated 95% CIs using the binomial exact method.  
54  
55  
56  
57  
58  
59  
60



1  
2  
3 289 To estimate determinants of hyperglycemia in the diabetic range, we computed  
4  
5 290 prevalence ratios with Poisson regression using robust estimation of standard errors<sup>26-28</sup>.  
6  
7 291 Potential variables for inclusion in the model were assessed using prior published literature and  
8  
9 292 bivariate Poisson regression analysis; an arbitrary p-value of <0.10 was used as criteria to  
10  
11 293 include the variable in the multivariable Poisson regression model to control for confounding  
12  
13 294 effects. For multivariable Poisson regression models, adjusted prevalence ratios (aPR), and  
14  
15 295 95% CIs for each independent variable were calculated. Additionally, <0.05 was used as the  
16  
17 296 level of significance. Multivariable Poisson regression models were generated separately for  
18  
19 297 urban and rural participants to account for possible effect measure modification. Collinearity was  
20  
21 298 assessed using the variance inflation factor to ensure a strong linear relationship among  
22  
23 299 independent variables included in the model was not present. All statistical procedures were  
24  
25 300 performed using Stata/SE 15.0 (StataCorp LP, Texas, USA) software package.  
26  
27  
28  
29

301

## 302 **Results**

### 303 Background Characteristics

304 Of the 2000 adults approached, 1843 agreed to participate in our study leading to a  
305 response rate of 92.1%. Twenty-four female participants were pregnant and were dropped from  
306 subsequent analyses to ensure those with gestational diabetes were not included. Additionally,  
307 no participants reported having been previously diagnosed with type-1 diabetes. There were  
308 892 (49.0%) male and 927 (50.9%) female respondents (Table 1). The age of our participants  
309 ranged from 18 to 90 years. The mean age and education level of participants were 40.5 (SD =  
310 14.7) years and 5.7 (SD = 5.1) years, respectively. The majority of the study population was  
311 married (88.0%) and employed as either an industrial worker/day laborer (26.5%) or housewife  
312 (39.9%). Almost half of participants never used some form of tobacco. The majority of  
313 participants engaged in vigorous physical activity over an average week (69.3%). The mean  
314 BMI was 22.1 (SD = 4.1) and the mean waist circumference was 78.4 cm (SD = 11.6). Overall,

1  
2  
3 315 the mean systolic blood pressure was 116.1 mmHg (SD = 17.1) and diastolic blood pressure  
4  
5 316 was 76.1 mmHg (SD = 10.5). The mean blood glucose level was 6.4 mmol/L (SD = 2.4). Figure  
6  
7 317 1 presents the distribution of blood glucose levels by various demographic factors.  
8  
9  
10 318

### 11 319 Prevalence and Risk Factors for Hyperglycemia

12  
13  
14 320 The prevalence of hyperglycemia was 5.5% (95% CI: 4.5-6.6). This prevalence was  
15  
16 321 significantly higher among urban participants (9.8%, 95%CI: 7.7-12.2) than rural participants  
17  
18 322 (2.8%, 95% CI: 1.9-3.9) (Table 2) and increased as age increased (Figure 2). The highest  
19  
20 323 prevalence of hyperglycemia was observed among those aged  $\geq 55$  years, at 8.2% (95% CI: 4.6-  
21  
22 324 13.1) among men and 9.4% (95% CI: 5.4-14.8) among women. The age-standardized  
23  
24 325 prevalence of hyperglycemia was 5.6% (95% CI: 4.6-6.8). The age-standardized prevalence of  
25  
26 326 hyperglycemia among urban and rural residents was 10.5% (95% CI: 9.2-12.1) and 2.8% (95%  
27  
28 327 CI: 2.1-3.7), respectively. Among men and women, the age-standardized prevalence of  
29  
30 328 hyperglycemia was 4.9% (95% CI: 3.9-6.0) and 6.0% (95% CI: 4.9-7.2), respectively.  
31  
32  
33 329

### 34 330 Self-Reported Diabetes Mellitus and Hyperglycemia

35  
36  
37 331 Ninety-five participants (5.2%) self-reported to have been previously diagnosed with  
38  
39 332 type-2 diabetes by a health care provider. However, 25 of those participants did not meet our  
40  
41 333 criteria of diagnosis of hyperglycemia as they did not take medication to control their diabetes  
42  
43 334 and their plasma glucose was below 11.1 mmol/L. Therefore, 69.3% of those with  
44  
45 335 hyperglycemia, per the study definition, were previously diagnosed with diabetes by a health  
46  
47 336 care provider.  
48

49  
50 337 The proportion of men and women who were previously diagnosed with diabetes by a  
51  
52 338 health care provider based on self-report was higher among urban residents (men: 8.4%;  
53  
54 339 women: 9,1%) than among rural residents (men: 2.9%; women: 3.0%) (Figure 3a). However,  
55  
56 340 overall, the large majority (81.8%) reported they did not know if they had been previously  
57  
58  
59  
60

1  
2  
3 341 diagnosed with diabetes; this proportion was higher among rural residents (87.8%) than urban  
4  
5 342 residents (72.2%).

6  
7 343 Among participants previously diagnosed with type-2 diabetes based on self-report,  
8  
9 344 72.6% reported taking medication to control their diabetes (Table 1). Urban women more  
10  
11 345 frequently (96.7%) self-reported to take diabetes medication than urban men (62.1%) (Figure  
12  
13 346 3b). We were able to confirm 100% of participant's self-reported diabetes treatment history by  
14  
15 347 checking prescriptions or medicine strips/vials.

16  
17  
18 348 Among participants who were categorized as hyperglycemic during study measurement,  
19  
20 349 over one-third (37.9%) of urban men self-reported to have diabetes, however, they did not take  
21  
22 350 any medication to control their diabetes. Among rural participants, the proportion of women who  
23  
24 351 did not take medication to control their self-reported diabetes was higher (52.9%) than men  
25  
26 352 (31.3%). Although three-quarters of self-reported diabetic participants reported taking  
27  
28 353 medication to control their diabetes, 31% continued to have high blood sugar levels indicating  
29  
30 354 uncontrolled diabetes at study measurement (Figure 4).

31  
32  
33 355

### 34 356 Determinants of Hyperglycemia

35  
36  
37 357 Table 2 presents the results of multivariable Poisson regression with robust variance  
38  
39 358 analyses to identify determinants of hyperglycemia. Among urban participants, those of older  
40  
41 359 age, lowest wealth quartile, hypertension, low physical activity, and with abdominal obesity  
42  
43 360 based on waist circumference, were more likely to have hyperglycemia. The prevalence of  
44  
45 361 hyperglycemia was significantly highest among those aged  $\geq 55$  years (aPR 3.92, 95% CI: 1.48-  
46  
47 362 10.39) compared to individuals aged 18-29 years of age. When compared to those in the 4<sup>th</sup>  
48  
49 363 (highest) wealth quartile, urban residents in the first (lowest) wealth quartile had 3.18 times the  
50  
51 364 prevalence of hyperglycemia. For urban individuals with hypertension, the prevalence of  
52  
53 365 hyperglycemia was 2.65 (95% CI:1.30-5.38) times that of individuals without hypertension. The  
54  
55 366 prevalence of hyperglycemia among those with low physical activity was 3.01 (95% CI: 1.42-

1  
2  
3 367 6.38) times that of urban participants with vigorous physical activity. Abdominal obesity also  
4  
5 368 significantly increased the prevalence of hyperglycemia among urban participants (aOR: 2.54,  
6  
7 369 95% CI: 1.35-4.77). Among rural participants, the only observed determinants of hyperglycemia  
8  
9 370 were hypertension (aPR: 5.39, 95% CI: 1.94-14.96) and abdominal obesity (aPR: 2.95, 95% CI:  
10  
11 371 1.32-6.58).

372

## 373 Discussion

374 Using data from this nationally representative sample, we estimate that about one in  
375 twenty Bangladeshi adults aged  $\geq 18$  years have hyperglycemia. The prevalence of  
376 hyperglycemia was higher among urban residents (9.8%) than rural residents (2.8%). Risk  
377 factors of hyperglycemia included older with age, urban residence, abdominal obesity, low  
378 physical activity, and hypertension. As diabetes is characterized by hyperglycemia, targeting  
379 high-risk groups identified in this analysis could be prioritized for effective diabetes preventive  
380 programs in Bangladesh. Bangladesh has adopted the goals and targets set forth by the WHO's  
381 Global Monitoring Framework for the Prevention and Control of NCDs for the year 2025<sup>11</sup>. One  
382 of these targets is to ensure there is a 0% increase in the age-standardized prevalence of  
383 hyperglycemia among adults aged  $\geq 18$  years by the year 2025. To our knowledge, the present  
384 study is the first to report national estimates on the prevalence of hyperglycemia starting at age  
385 18 years in both urban and rural areas of Bangladesh. Data gathered from this national-level  
386 study are critical towards the measurement of progress towards the nine global targets for  
387 Bangladesh for 2025.

388 Globally, the number of adults living with diabetes has risen from 108 million in 1980 to  
389 422 million in 2013, and low- and middle-income countries (LMICs) have seen the most rapid  
390 rise in diabetes prevalence<sup>3</sup>. Several lifestyle factors have been attributed to the increase in  
391 prevalence across LMICs including, globalization of food production, extensive marketing of  
392 low-cost and energy-dense foods, increased sedentary behavior and rapid urbanization<sup>29</sup>. In

1  
2  
3 393 recent decades, the increase in the prevalence of diabetes in South Asia has been greater than  
4  
5 394 that seen in high-income countries<sup>4</sup>. The prevalence of diabetes in adults across countries in  
6  
7 395 South Asia is similar, excluding Nepal which has a low prevalence in comparison to neighboring  
8  
9 396 countries (8.8% in India, 8.6% in Sri Lanka, 6.9% in Bangladesh, 7.9% in Bhutan, 6.9% in  
10  
11 397 Pakistan, and 4.0% in Nepal)<sup>30</sup>. In our study, we observed a prevalence of 5.6% hyperglycemia  
12  
13 398 in the diabetic range among adults aged 18 years and above. This prevalence is lower than  
14  
15 399 previous studies conducted in Bangladesh and neighboring countries. In fact, a scoping review  
16  
17 400 estimated the pooled prevalence of type-2 diabetes to be 7.4%<sup>7</sup>. Our estimated prevalence was  
18  
19 401 lower due to a younger study population (18 years and above compared to the WHO estimate  
20  
21 402 among adults aged 30 years and above), and a higher percentage of participants from rural  
22  
23 403 areas (61.1%, as is representative of Bangladesh). Indeed, when we restrict our analytic sample  
24  
25 404 to 30 years and above, the prevalence of hyperglycemia is 6.7%, which is similar to the 2017  
26  
27 405 WHO estimate of diabetes (6.9%). Significant heterogeneity in diabetes and its determinants  
28  
29 406 may exist within one country due to variations in the level of urbanization by state, ethnic  
30  
31 407 phenotypes, and socioeconomic status of specific sub-populations<sup>31</sup>.

32  
33  
34 408       Significant determinants of raised blood glucose in both urban and rural areas of our  
35  
36 409 assessment included hypertension, low physical activity, and abdominal obesity. Interestingly,  
37  
38 410 there was no association of diabetes identified for increasing body mass index (BMI). This  
39  
40 411 indicates that abdominal obesity may be a more significant factor to consider than BMI. Prior  
41  
42 412 studies conducted in Bangladesh have also identified a positive association of central (or  
43  
44 413 abdominal) obesity with diabetes<sup>32</sup>. Interestingly, our assessment found a decrease in odds of  
45  
46 414 diabetes with increasing wealth quartile. Prior studies have conflicting findings on the risk of  
47  
48 415 diabetes and other NCDs, among the wealthy based on demographic features such as the area  
49  
50 416 of residence. One prior study conducted in Bangladesh found that people from the highest  
51  
52 417 wealth quintile are significantly more likely to have diabetes than people from the lowest wealth  
53  
54 418 quintile<sup>33</sup>. However, another found a high burden of selected NCDs, including diabetes, among  
55  
56  
57  
58  
59  
60

1  
2  
3 419 the lowest wealth quintile populations in rural areas and wealthy populations in urban areas<sup>34</sup>.

4  
5 420 Further study is warranted to assess the reliability of wealth indices as a measurement of

6  
7 421 socioeconomic status and wealth among Bangladeshi adults.

8  
9 422 In our study, a high proportion (~70%) of those with hyperglycemia self-reported to have

10  
11 423 been previously diagnosed with diabetes and therefore, aware of their condition. Additionally,

12  
13 424 72% reported taking medication to control their diabetes. However, we found that almost one-

14  
15 425 third of those who self-reported to take medication for their diabetes continued to have

16  
17 426 hyperglycemia. Efforts should be made to ensure diabetics in Bangladesh are treated for their

18  
19 427 condition and secondary prevention of complications of diabetes, such as diabetic retinopathy.

20  
21 428 This is of particular concern in developing countries where resources are limited and cost-

22  
23 429 effective solutions for chronic disease treatment should be prioritized. A recently published

24  
25 430 study found that healthcare expenditure in persons with diabetes in Bangladesh is six times

26  
27 431 higher than in persons without diabetes<sup>14</sup>. Prevention and management of diabetes are likely to

28  
29 432 be a cost-saving approach for Bangladesh through the utilization of community health workers

30  
31 433 adequately trained to effectively screen for, and identify, people with diabetes<sup>35</sup>.

32  
33 434 This study has several strengths. Data collected for our study was of a nationally

34  
35 435 representative sample indicating our results are generalizable to the population of Bangladeshi

36  
37 436 adults aged 18 years and above. Additionally, due to our large sample size, we were able to

38  
39 437 conduct precise subgroup analyses. However, several limitations should also be considered

40  
41 438 when interpreting the results of this analysis. We assessed blood glucose levels using random

42  
43 439 capillary blood samples, however, we did not assess each participant's history of classical

44  
45 440 symptoms of hyperglycemia, which is necessary to diagnose diabetes according to the ADA

46  
47 441 guidelines<sup>21</sup>. Additionally, we were unable to measure known determinants of type-2 diabetes

48  
49 442 factors such as diet or family history of diabetes. Further, we did not collect blood glucose

50  
51 443 samples in fasting or two-hour post-prandial status to also assess prediabetes. Future studies

52  
53 444 should consider the addition of glycosylated hemoglobin measurement when assessing the

1  
2  
3 445 prevalence of diabetes as this method could provide a more long-term and stable diagnosis of  
4  
5 446 diabetes mellitus. Finally, due to the cross-sectional nature of this study, we were unable to  
6  
7 447 define temporality of certain determinants of hyperglycemia identified and therefore, unable to  
8  
9 448 assess causality.

10 449

## 11 12 13 14 450 **Conclusion**

15  
16 451 Data from this nationally-representative sample of Bangladeshi adults aged 18 years  
17  
18 452 and above will be critical to informing the progress of NCD control in Bangladesh per the WHO's  
19  
20 453 Global Monitoring Framework and goals for 2025. We found that about one in twenty  
21  
22 454 Bangladeshi adults aged  $\geq 18$  years have hyperglycemia. Among urban residents, we found that  
23  
24 455 about one in ten Bangladeshi adults aged  $\geq 18$  years have hyperglycemia. Bangladeshi adults  
25  
26 456 with hypertension and abdominal obesity are high-risk groups for the development of diabetes  
27  
28 457 and should be targeted for routine screening for diabetes. Preventive methods such as lifestyle  
29  
30 458 changes and medication should be recommended by primary care providers in Bangladesh to  
31  
32 459 avoid the future development of CVDs among this group. In order to control the prevalence of  
33  
34 460 hyperglycemia in the diabetic range, and reduce the burden of diabetes or associated risk  
35  
36 461 factors, national initiatives such as training community health workers to deliver primary care  
37  
38 462 and implementing universal health coverage should be implemented to curb the spread of  
39  
40 463 NCDs in Bangladesh.

41 464

42 465

43 466

44 467

45 468

46 469

47 470



1  
2  
3 471 Figures  
4

5 472 Figure 1: Urban and Rural differences in the distribution of blood glucose levels based on  
6  
7 473 random capillary blood measurement among (A) All Participants, and (B) Men and Women (n =  
8  
9 474 1819)  
10

11 475 Figure 2: Prevalence of hyperglycemia among Bangladeshi adults aged 18 years and above by  
12  
13 476 sex and age group, 2015 (n = 1819)  
14

15 477 Figure 3: Bangladeshi adults aged 18 years and above with (A) self-reported diabetes and (B)  
16  
17 478 self-reported diabetics on diabetes medications, 2015  
18

19 479 Figure 4: Self-reported diabetics aged 18 years or older who take diabetes medication with  
20  
21 480 hyperglycemia on study measurement ( $\geq 11.0$ mmol/L)  
22  
23

24 481

25  
26 482

27  
28 483

29  
30 484

31  
32 485

33  
34 486

35  
36 487

37  
38 488

39  
40 489

41  
42 490

43  
44 491

45  
46 492

47  
48 493

49  
50 494

51  
52 495

53  
54 496  
55  
56  
57  
58  
59  
60



1  
2  
3 497 **Abbreviations**  
4

5 498 WHO: World Health Organization  
6

7 499 ADA: American Diabetes Association  
8

9 500 aPR: Adjusted prevalence ratio  
10

11 501 BBS: Bangladesh Bureau of Statistics  
12

13 502 BMI: Body mass index  
14

15 503 BP: Blood pressure  
16

17 504 BSMMU: Bangabandhu Sheikh Mujib Medical University  
18

19 505 CI: Confidence interval  
20

21 506 CVD: Cardiovascular disease  
22

23 507 MET: Metabolic equivalent  
24

25 508 mmHg: Millimeter of mercury  
26

27 509 mmol/L: Millimoles per liter  
28

29 510 NCD: Non-communicable disease  
30

31 511 SBP: Systolic blood pressure  
32

33 512 DBP: Diastolic blood pressure  
34

35 513 PSU: Primary sampling unit  
36

37 514 SD: Standard deviation  
38

39 515 STEPS: STEPwise approach to Surveillance  
40

41 516  
42

43 517  
44

45 518  
46

47 519  
48

49 520  
50

51 521  
52

53 522  
54  
55  
56  
57  
58  
59  
60

1  
2  
3 **523 Footnotes**  
4

5 **524 Ethics approval and consent to participate:** Ethical guidelines as outlined by the Declaration of  
6  
7 **525** Helsinki were followed throughout the study. Ethical clearance was obtained from the  
8  
9 **526** Institutional Review Board of Bangabandhu Sheikh Mujib Medical University (BSMMU) (Protocol  
10  
11 **527** Number: 1100). We obtained permission from the relevant administrative units of the surveyed  
12  
13 **528** districts. Orientations with community leaders (elected representatives of the local government  
14  
15 **529** offices) were conducted prior to data collection for community engagement in the study's  
16  
17 **530** implementation process. Written (or thumb impression if unable to write) consent was obtained  
18  
19 **531** from the respondents in Bangla as per BSMMU Institutional Review Board (IRB) guidelines.

20  
21  
22 **532 Consent to publish:** All authors consent to the publication of this manuscript.  
23

24 **533 Availability of data and materials:** The de-identified participant data used and/or analyzed during  
25  
26 **534** the current study are available from the corresponding author on reasonable request. Please  
27  
28 **535** contact M. Mostafa Zaman at zamanm@who.int for further information and guidelines.  
29

30  
31 **536 Competing Interests:** The authors declare no competing interests. The authors alone are  
32  
33 **537** responsible for views expressed in this article and they do not necessarily represent the views,  
34  
35 **538** decisions or policies of the institutions with which they are affiliated.  
36

37 **539 Funding:** The study was conducted with the technical and financial assistance of the World  
38  
39 **540** Health Organization Country Office for Bangladesh.  
40

41 **541 Authors contributions:** JYI: conceptualized the manuscript, analyzed data, interpreted results  
42  
43 **542** critically, and drafted the manuscript. MMZ: designed the study, interpreted results critically,  
44  
45 **543** guided manuscript writing, and critically reviewed it. MRB, SAH, SA, ZAQ: trained the field team,  
46  
47 **544** implemented the survey, processed and analyzed data, and reviewed the manuscript.  
48

49 **545 Acknowledgments:** The authors thank Mr. Hassanuzzaman Khan for his efforts on data  
50  
51 **546** management.  
52

53  
54 **547**  
55

56 **548**  
57  
58  
59  
60

549 **References**

- 550 1. Disease GBD, Injury I, Prevalence C. Global, regional, and national incidence, prevalence,  
551 and years lived with disability for 354 diseases and injuries for 195 countries and  
552 territories, 1990-2017: a systematic analysis for the Global Burden of Disease Study  
553 2017. *Lancet (London, England)* 2018;392(10159):1789-858. doi: 10.1016/S0140-  
554 6736(18)32279-7
- 555 2. Ogurtsova K, da Rocha Fernandes JD, Huang Y, et al. IDF Diabetes Atlas: Global estimates  
556 for the prevalence of diabetes for 2015 and 2040. *Diabetes research and clinical practice*  
557 2017;128:40-50. doi: 10.1016/j.diabres.2017.03.024
- 558 3. Global report on diabetes. Geneva, Switzerland: World Health Organization 2016.
- 559 4. Jayawardena R, Ranasinghe P, Byrne NM, et al. Prevalence and trends of the diabetes  
560 epidemic in South Asia: a systematic review and meta-analysis. *BMC public health*  
561 2012;12:380. doi: 10.1186/1471-2458-12-380
- 562 5. IDF diabetes atlas sixth edition Brussels, Belgium International Diabetes Federation, 2013.
- 563 6. Saquib N, Saquib J, Ahmed T, et al. Cardiovascular diseases and type 2 diabetes in  
564 Bangladesh: a systematic review and meta-analysis of studies between 1995 and 2010.  
565 *BMC public health* 2012;12:434. doi: 10.1186/1471-2458-12-434
- 566 7. Biswas T, Islam A, Rawal LB, et al. Increasing prevalence of diabetes in Bangladesh: a  
567 scoping review. *Public health* 2016;138:4-11. doi: 10.1016/j.puhe.2016.03.025
- 568 8. Rahman MS, Akter S, Abe SK, et al. Awareness, treatment, and control of diabetes in  
569 Bangladesh: a nationwide population-based study. *PloS one* 2015;10(2):e0118365. doi:  
570 10.1371/journal.pone.0118365
- 571 9. Akter S, Rahman MM, Abe SK, et al. Prevalence of diabetes and prediabetes and their risk  
572 factors among Bangladeshi adults: a nationwide survey. *Bulletin of the World Health*  
573 *Organization* 2014;92(3):204-13, 13A. doi: 10.2471/BLT.13.128371

- 1  
2  
3 574 10. Zaman MM, Choudhury SR, Ahmed J, et al. Blood glucose and cholesterol levels in adult  
4  
5 575 population of Bangladesh: Results from STEPS 2006 survey. *Indian heart journal*  
6  
7 576 2016;68(1):52-6. doi: 10.1016/j.ihj.2015.06.031  
8  
9 577 11. NCD Global Monitoring Framework: World Health Organization; 2017 [Available from:  
10  
11 578 [http://www.who.int/nmh/global\\_monitoring\\_framework/en/](http://www.who.int/nmh/global_monitoring_framework/en/) accessed 09/29 2017.  
12  
13 579 12. Global action plan for the prevention and control of noncommunicable diseases 2013-2020.  
14  
15 580 Geneva, Switzerland: World Health Organization, 2013.  
16  
17 581 13. Siddique MKB, Islam SMS, Banik PC, et al. Diabetes knowledge and utilization of  
18  
19 582 healthcare services among patients with type 2 diabetes mellitus in Dhaka, Bangladesh.  
20  
21 583 *BMC health services research* 2017;17(1):586. doi: 10.1186/s12913-017-2542-3  
22  
23 584 14. Shariful Islam SM, Lechner A, Ferrari U, et al. Healthcare use and expenditure for diabetes  
24  
25 585 in Bangladesh. *BMJ Glob Health* 2017;2(1):e000033. doi: 10.1136/bmjgh-2016-000033  
26  
27 586 15. Haghparast-Bidgoli H, Shaha SK, Kuddus A, et al. Protocol of economic evaluation and  
28  
29 587 equity impact analysis of mHealth and community groups for prevention and control of  
30  
31 588 diabetes in rural Bangladesh in a three-arm cluster randomised controlled trial. *BMJ*  
32  
33 589 *open* 2018;8(8):e022035. doi: 10.1136/bmjopen-2018-022035  
34  
35 590 16. Islam JY, Zaman MM, Haq SA, et al. Epidemiology of hypertension among Bangladeshi  
36  
37 591 adults using the 2017 ACC/AHA Hypertension Clinical Practice Guidelines and Joint  
38  
39 592 National Committee 7 Guidelines. *Journal of human hypertension* 2018;32(10):668-80.  
40  
41 593 doi: 10.1038/s41371-018-0087-5  
42  
43 594 17. Chronic Disease and Health Promotion: STEP wise approach to surveillance (STEPS).  
44  
45 595 Geneva: World Health Organization.  
46  
47 596 18. Population and Housing Census 2001, updated in 2009. Dhaka, Bangladesh: Bangladesh  
48  
49 597 Bureau of Statistics 2009.  
50  
51  
52  
53  
54  
55  
56  
57  
58  
59  
60

- 1  
2  
3 598 19. Goycochea-Robles MV, Sanin LH, Moreno-Montoya J, et al. Validity of the COPCORD core  
4  
5 599 questionnaire as a classification tool for rheumatic diseases. *J Rheumatol Suppl*  
6  
7 600 2011;86:31-5. doi: 10.3899/jrheum.100955  
8  
9 601 20. Guidelines for Care of Type 2 Diabetes Mellitus in Bangladesh. Dhaka, Bangladesh:  
10  
11 602 BIRDEM Clinical Research Group, 2003.  
12  
13 603 21. American Diabetes A. 2. Classification and Diagnosis of Diabetes. *Diabetes care*  
14  
15 604 2017;40(Suppl 1):S11-S24. doi: 10.2337/dc17-S005  
16  
17 605 22. Moniruzzaman M, Mostafa Zaman M, Islam MS, et al. Physical activity levels in Bangladeshi  
18  
19 606 adults: results from STEPS survey 2010. *Public health* 2016;137:131-8. doi:  
20  
21 607 10.1016/j.puhe.2016.02.028  
22  
23 608 23. A global brief on Hypertension: Silent Killer, global public health crisis. Geneva, Switzerland:  
24  
25 609 World Health Organization, 2013.  
26  
27 610 24. Ahmad OB, Boschi-Pinto C, Lopez AD, et al. Age Standardization of Rates: A New WHO  
28  
29 611 Standard. GPE Discussion Paper Series: No31 Geneva, Switzerland: World Health  
30  
31 612 Organization, 2001.  
32  
33 613 25. World (WHO 2000-2025) Standard Rockville, MD: National Cancer Institute: Surveillance,  
34  
35 614 Epidemiology, and End Results Program; 2017 [Available from:  
36  
37 615 <https://seer.cancer.gov/stdpopulations/world.who.html> accessed December 17 2017.  
38  
39 616 26. Coutinho LM, Scazufca M, Menezes PR. Methods for estimating prevalence ratios in cross-  
40  
41 617 sectional studies. *Revista de saude publica* 2008;42(6):992-8.  
42  
43 618 27. Behrens T, Taeger D, Wellmann J, et al. Different methods to calculate effect estimates in  
44  
45 619 cross-sectional studies. A comparison between prevalence odds ratio and prevalence  
46  
47 620 ratio. *Methods Inf Med* 2004;43(5):505-9.  
48  
49 621 28. Barros AJ, Hirakata VN. Alternatives for logistic regression in cross-sectional studies: an  
50  
51 622 empirical comparison of models that directly estimate the prevalence ratio. *BMC medical*  
52  
53 623 *research methodology* 2003;3:21. doi: 10.1186/1471-2288-3-21  
54  
55  
56  
57  
58  
59  
60

- 1  
2  
3 624 29. Singh PN, Arthur KN, Orlich MJ, et al. Global epidemiology of obesity, vegetarian dietary  
4  
5 625 patterns, and noncommunicable disease in Asian Indians. *The American journal of*  
6  
7 626 *clinical nutrition* 2014;100 Suppl 1:359S-64S. doi: 10.3945/ajcn.113.071571  
8  
9 627 30. Hills AP, Arena R, Khunti K, et al. Epidemiology and determinants of type 2 diabetes in  
10  
11 628 south Asia. *Lancet Diabetes Endocrinol* 2018;6(12):966-78. doi: 10.1016/S2213-  
12  
13 629 8587(18)30204-3  
14  
15 630 31. Chan JC, Malik V, Jia W, et al. Diabetes in Asia: epidemiology, risk factors, and  
16  
17 631 pathophysiology. *Jama* 2009;301(20):2129-40. doi: 10.1001/jama.2009.726  
18  
19 632 32. Alam DS, Talukder SH, Chowdhury MA, et al. Overweight and abdominal obesity as  
20  
21 633 determinants of undiagnosed diabetes and pre-diabetes in Bangladesh. *BMC Obes*  
22  
23 634 2016;3:19. doi: 10.1186/s40608-016-0099-z  
24  
25 635 33. Tareque MI, Koshio A, Tiedt AD, et al. Are the rates of hypertension and diabetes higher in  
26  
27 636 people from lower socioeconomic status in Bangladesh? Results from a nationally  
28  
29 637 representative survey. *PloS one* 2015;10(5):e0127954. doi:  
30  
31 638 10.1371/journal.pone.0127954  
32  
33 639 34. Biswas T, Islam MS, Linton N, et al. Socio-Economic Inequality of Chronic Non-  
34  
35 640 Communicable Diseases in Bangladesh. *PloS one* 2016;11(11):e0167140. doi:  
36  
37 641 10.1371/journal.pone.0167140  
38  
39 642 35. Gaziano TA, Abrahams-Gessel S, Denman CA, et al. An assessment of community health  
40  
41 643 workers' ability to screen for cardiovascular disease risk with a simple, non-invasive risk  
42  
43 644 assessment instrument in Bangladesh, Guatemala, Mexico, and South Africa: an  
44  
45 645 observational study. *The Lancet Global health* 2015;3(9):e556-63. doi: 10.1016/S2214-  
46  
47 646 109X(15)00143-6  
48  
49  
50  
51  
52  
53  
54  
55  
56  
57  
58  
59  
60

**Table 1: Background Characteristics of Bangladeshi adult participants, 2015 (n = 1819)**

| Characteristic                       | Total (n = 1819) |      |      | Urban (n = 708) |     |      | Rural (n = 1111) |     |      |
|--------------------------------------|------------------|------|------|-----------------|-----|------|------------------|-----|------|
|                                      | Mean (SD)        | n    | %    | Mean (SD)       | n   | %    | Mean (SD)        | n   | %    |
| Sex                                  |                  |      |      |                 |     |      |                  |     |      |
| Male                                 |                  | 892  | 49.0 |                 | 345 | 48.7 |                  | 547 | 49.2 |
| Female                               |                  | 927  | 50.9 |                 | 363 | 51.3 |                  | 564 | 50.8 |
| Age(years)                           | 40.5 (14.7)      |      |      | 39.1 (13.9)     |     |      | 41.4 (15.1)      |     |      |
| Education (Years) <sup>a</sup>       | 5 (0 - 9)        |      |      | 8 (3-12)        |     |      | 4 (0-8)          |     |      |
| Marital Status                       |                  |      |      |                 |     |      |                  |     |      |
| Never Married                        |                  | 110  | 6.1  |                 | 54  | 7.6  |                  | 56  | 4.9  |
| Married                              |                  | 1601 | 88.0 |                 | 619 | 87.4 |                  | 982 | 88.4 |
| Separated/Divorced/Widowed           |                  | 108  | 5.9  |                 | 35  | 4.9  |                  | 73  | 6.5  |
| Occupation                           |                  |      |      |                 |     |      |                  |     |      |
| Professional employment <sup>b</sup> |                  | 279  | 15.2 |                 | 189 | 26.7 |                  | 90  | 8.1  |
| Unemployed/retired                   |                  | 98   | 5.3  |                 | 43  | 6.1  |                  | 55  | 4.9  |
| Industrial worker/Day Laborer        |                  | 483  | 26.6 |                 | 120 | 16.9 |                  | 363 | 32.7 |
| Housewife                            |                  | 726  | 39.9 |                 | 247 | 34.9 |                  | 479 | 43.2 |
| Other <sup>c</sup>                   |                  | 232  | 12.8 |                 | 109 | 15.4 |                  | 123 | 11.1 |
| Wealth Index <sup>d</sup>            |                  |      |      |                 |     |      |                  |     |      |
| 1st Wealth Quartile                  |                  | 407  | 22.4 |                 | 110 | 15.5 |                  | 297 | 26.7 |
| 2nd Wealth Quartile                  |                  | 533  | 29.3 |                 | 171 | 24.2 |                  | 362 | 32.6 |
| 3rd Wealth Quartile                  |                  | 429  | 23.6 |                 | 179 | 25.3 |                  | 250 | 22.5 |
| 4th Wealth Quartile                  |                  | 450  | 24.7 |                 | 248 | 35.0 |                  | 202 | 18.2 |
| Tobacco Use <sup>e</sup>             |                  |      |      |                 |     |      |                  |     |      |
| Never                                |                  | 859  | 47.2 |                 | 389 | 54.9 |                  | 470 | 42.3 |
| Current Use                          |                  | 821  | 45.1 |                 | 268 | 37.9 |                  | 553 | 49.8 |
| Past Use                             |                  | 139  | 7.6  |                 | 51  | 7.2  |                  | 88  | 7.9  |
| Smoking Tobacco Use <sup>f</sup>     |                  |      |      |                 |     |      |                  |     |      |
| Every day / Occasionally             |                  | 494  | 27.2 |                 | 169 | 23.9 |                  | 325 | 29.3 |
| Past Use                             |                  | 104  | 5.7  |                 | 38  | 5.4  |                  | 66  | 5.9  |
| Never                                |                  | 1221 | 67.1 |                 | 501 | 70.8 |                  | 720 | 64.8 |
| Smokeless Tobacco Use <sup>g</sup>   |                  |      |      |                 |     |      |                  |     |      |
| Every day / Occasionally             |                  | 529  | 29.1 |                 | 150 | 21.2 |                  | 379 | 34.1 |
| Past Use                             |                  | 51   | 2.8  |                 | 21  | 2.9  |                  | 30  | 2.7  |
| Never                                |                  | 1239 | 68.1 |                 | 537 | 75.9 |                  | 702 | 63.2 |
| Physical Activity <sup>h</sup>       |                  |      |      |                 |     |      |                  |     |      |
| Vigorous                             |                  | 1268 | 69.7 |                 | 445 | 62.9 |                  | 823 | 74.1 |
| Moderate                             |                  | 464  | 25.5 |                 | 234 | 33.1 |                  | 230 | 20.7 |
| Low                                  |                  | 87   | 4.7  |                 | 29  | 4.1  |                  | 58  | 5.2  |

|   |                                                        |              |    |              |  |              |      |  |         |
|---|--------------------------------------------------------|--------------|----|--------------|--|--------------|------|--|---------|
| 1 |                                                        |              |    |              |  |              |      |  |         |
| 2 | Body Mass Index <sup>i</sup>                           | 22.1 (4.1)   |    | 23.3 (4.5)   |  | 21.3 (3.7)   |      |  |         |
| 3 | Waist Circumference (cm)                               | 78.4 (11.6)  |    | 81.8 (12.6)  |  | 76.2 (10.3)  |      |  |         |
| 4 | Blood Pressure                                         |              |    |              |  |              |      |  |         |
| 5 | Systolic Blood Pressure (mmHg)                         | 116.1 (17.1) |    | 117.9 (16.6) |  | 115.0 (17.3) |      |  |         |
| 6 | Diastolic Blood Pressure (mmHg)                        | 76.1 (10.5)  |    | 77.9 (10.9)  |  | 74.9 (10.1)  |      |  |         |
| 7 | Blood Glucose Level (mmol/l)                           | 6.4 (2.4)    |    | 6.6 (2.9)    |  | 6.3 (2.1)    |      |  |         |
| 8 | Self-reported diabetes medication history <sup>j</sup> |              | 69 | 72.6         |  | 50           | 80.6 |  | 19 57.6 |

9 Abbreviations: SD, standard deviation

10 <sup>a</sup> Calculated median and interquartile range for education as the data are skewed

11 <sup>b</sup> Professional occupation includes: Field staff, police officer, guard, doctor, engineer, professional, business man, desk job

12 <sup>c</sup> Other occupation includes: Shop keeper, weavers, driver, student, beggar, cook, carpenter, tailor, migrant workers and fishermen

13 <sup>d</sup> Wealth index was calculated using principal component analysis using data collected on household ownership of the following items: electricity, flushable toilet, land phone, cell phone, television, radio, refrigerator, private car, motor cycle, washing machine, bicycle, sewing machine, almirah/wardrobe, table, bed, chair/bench, watch/clock, as well as, type of main material used to build their homes roof, walls and floor

16 <sup>e</sup> Includes both smokeless tobacco and smoke tobacco

17 <sup>f</sup> Smoking tobacco use includes cigarettes, biri, hookah, etc.

18 <sup>g</sup> Smokeless tobacco use includes jarda, sada pata, pan mashala with tobacco leaf, gul etc.

19 <sup>h</sup> Measured in MET-minutes; 1 MET stands for the amount of oxygen you consume and the number of calories you burn at rest.

20 <sup>i</sup> Body mass index (BMI) calculated by weight in kilogram divided by height in meter squared

21 <sup>j</sup> Percentage reported out of participants who self-reported to have diabetes (Total n = 95; Urban n = 62; Rural n = 33)

Peer Review only



**Table 2: Determinants of hyperglycemia among Bangladeshi adults, 2015 (n = 1819)**

| Characteristic                  | Total (n = 1819)                         |                                      | Urban (n = 708)                       |                                      | Rural (n = 1111)                      |                                      |
|---------------------------------|------------------------------------------|--------------------------------------|---------------------------------------|--------------------------------------|---------------------------------------|--------------------------------------|
|                                 | Diabetes <sup>a</sup><br>Prevalence<br>% | Adjusted PR <sup>b</sup><br>(95% CI) | Diabetes <sup>a</sup><br>Prevalence % | Adjusted OR <sup>b</sup><br>(95% CI) | Diabetes <sup>a</sup><br>Prevalence % | Adjusted OR <sup>b</sup><br>(95% CI) |
| <b>Area</b>                     |                                          |                                      |                                       |                                      |                                       |                                      |
| Urban                           | 9.8                                      | Ref.                                 | -                                     | -                                    | -                                     | -                                    |
| Rural                           | 2.8                                      | 0.44 (0.28 – 0.68)                   | -                                     | -                                    | -                                     | -                                    |
| <b>Sex</b>                      |                                          |                                      |                                       |                                      |                                       |                                      |
| Male                            | 4.9                                      | Ref.                                 | 7.5                                   | Ref.                                 | 3.3                                   | Ref.                                 |
| Female                          | 5.9                                      | 1.05 (0.71 – 1.54)                   | 11.9                                  | 1.26 (0.80 – 1.99)                   | 2.2                                   | 0.61 (0.29 – 1.28)                   |
| <b>Age (years)</b>              |                                          |                                      |                                       |                                      |                                       |                                      |
| 18 - 29                         | 2.5                                      | Ref.                                 | 2.5                                   | Ref.                                 | 2.5                                   | Ref.                                 |
| 30 - 44                         | 4.9                                      | 1.48 (0.78 – 2.79)                   | 8.4                                   | 2.55 (1.01 – 6.41)                   | 2.5                                   | 0.76 (0.30 – 1.93)                   |
| 45 - 54                         | 7.4                                      | 2.18 (1.10 – 4.31)                   | 15.5                                  | 4.38 (1.62 – 11.59)                  | 2.8                                   | 0.67 (0.25 – 1.83)                   |
| ≥ 55                            | 8.8                                      | 1.92 (0.95 – 3.86)                   | 19.3                                  | 3.92 (1.48 – 10.39)                  | 3.4                                   | 0.53 (0.17 – 1.67)                   |
| <b>Educational Status</b>       |                                          |                                      |                                       |                                      |                                       |                                      |
| No Education                    | 3.4                                      | Ref.                                 | 7.0                                   | Ref.                                 | 2.1                                   | Ref.                                 |
| Primary Education               | 3.7                                      | 1.00 (0.53 – 1.86)                   | 7.6                                   | 1.00 (0.44 – 2.30)                   | 2.1                                   | 0.84 (0.30 – 2.30)                   |
| Secondary Education             | 6.9                                      | 1.67 (0.95 – 2.93)                   | 12.1                                  | 1.94 (0.95 – 3.97)                   | 2.9                                   | 1.01 (0.40 – 2.54)                   |
| Above Secondary Education       | 9.8                                      | 1.48 (0.77 – 2.84)                   | 10.4                                  | 1.54 (0.71 – 3.33)                   | 8.1                                   | 2.24 (0.68 – 7.41)                   |
| <b>Wealth Index<sup>c</sup></b> |                                          |                                      |                                       |                                      |                                       |                                      |
| 1st Wealth Quartile             | 7.7                                      | 2.58 (1.57 – 4.24)                   | 18.9                                  | 3.18 (1.80 – 5.62)                   | 3.6                                   | 1.37 (0.53 – 3.49)                   |
| 2nd Wealth Quartile             | 4.3                                      | 1.23 (0.71 – 2.14)                   | 9.4                                   | 1.50 (0.82 – 2.77)                   | 1.9                                   | 0.70 (0.24 – 2.05)                   |
| 3rd Wealth Quartile             | 3.7                                      | 0.86 (0.47 – 1.58)                   | 6.0                                   | 0.96 (0.48 – 1.92)                   | 2.0                                   | 0.55 (0.18 – 1.73)                   |
| 4th Wealth Quartile             | 6.6                                      | Ref.                                 | 8.8                                   | Ref.                                 | 3.9                                   | Ref.                                 |
| <b>Blood Pressure</b>           |                                          |                                      |                                       |                                      |                                       |                                      |
| Normal Blood Pressure           | 1.9                                      | Ref.                                 | 3.5                                   | Ref.                                 | 1.1                                   | Ref.                                 |
| Pre-Hypertension <sup>d</sup>   | 5.7                                      | 1.74 (1.00 – 3.01)                   | 8.3                                   | 1.37 (0.69 – 2.74)                   | 3.8                                   | 2.32(0.91 – 5.92)                    |
| Hypertension <sup>e</sup>       | 18.9                                     | 3.57 (2.01 – 6.34)                   | 27.4                                  | 2.65 (1.30 – 5.38)                   | 8.8                                   | 5.39(1.94 – 14.96)                   |
| <b>Physical Activity</b>        |                                          |                                      |                                       |                                      |                                       |                                      |
| Vigorous                        | 3.9                                      | Ref.                                 | 6.9                                   | Ref.                                 | 2.3                                   | Ref.                                 |
| Moderate                        | 8.2                                      | 1.18 (0.78 – 1.77)                   | 13.8                                  | 1.22 (0.77 – 1.93)                   | 2.1                                   | 0.65 (0.22 – 1.88)                   |
| Low                             | 14.9                                     | 3.04 (1.69 – 5.47)                   | 20.7                                  | 3.01 (1.42 – 6.38)                   | 12.1                                  | 2.58 (0.95 – 7.04)                   |

|   |                                |      |                    |      |                    |     |                    |
|---|--------------------------------|------|--------------------|------|--------------------|-----|--------------------|
| 1 |                                |      |                    |      |                    |     |                    |
| 2 | Body Mass Index <sup>f</sup>   |      |                    |      |                    |     |                    |
| 3 | Underweight (<18.5)            | 1.1  | 0.37 (0.12 – 1.13) | 1.8  | 0.38 (0.07 – 1.95) | 0.7 | 0.42 (0.09 – 2.02) |
| 4 | Normal (18.5 - 25)             | 4.7  | Ref.               | 8.2  | Ref.               | 2.8 | Ref.               |
| 5 | Overweight (25.1 - 30)         | 10.4 | 1.06 (0.68 – 1.65) | 14.0 | 1.05 (0.61 – 1.80) | 6.2 | 1.22 (0.51 – 2.91) |
| 6 | Obese (>30)                    | 20.9 | 1.49 (0.87 – 2.57) | 26.5 | 1.46 (0.81 – 2.64) | 5.6 | 0.95 (0.12 – 7.60) |
| 7 | Waist Circumference (cm)       |      |                    |      |                    |     |                    |
| 8 | Normal <sup>g</sup>            | 2.3  | Ref.               | 3.8  | Ref.               | 1.6 | Ref.               |
| 9 | Abdominally Obese <sup>h</sup> | 13.3 | 2.49 (1.53 – 4.07) | 18.1 | 2.54 (1.35 – 4.77) | 6.8 | 2.95 (1.32 – 6.58) |

10 Abbreviations: PR = prevalence ratio, CI = confidence intervals, Ref = referent category

11 <sup>a</sup> Hyperglycemia was defined as a capillary blood glucose level greater than or equal to 11.1 mmol/L or self-reported diabetes medication use

12 <sup>b</sup> Model adjusted for all variables included in table: sex, age, education, wealth index, blood pressure, body mass index, self-reported physical activity, and waist circumference

13 <sup>c</sup> Wealth index was calculated using principal component analysis using data collected on household ownership of the following items: electricity, flushable toilet, land phone, cell phone, television, radio, refrigerator, private car, motor cycle, washing machine, bicycle, sewing machine, almirah/wardrobe, table, bed, chair/bench, watch/clock, as well as, type of main material used to build their homes roof, walls and floor

14 <sup>d</sup> Pre-Hypertension was defined as SBP ≥120 mmHg but < 140 mmHg and/or DBP ≥ 80 mmHg but <90 mmHg and not taking anti-hypertensive medication at the time of the survey

15 <sup>e</sup> Hypertension was defined as systolic blood pressure (SBP) was ≥140 mmHg (millimeters of mercury) and/or, diastolic blood pressure (DBP) ≥90 mmHg and/or taking any-hypertensive medication

16 <sup>f</sup> Body mass index (BMI) calculated by weight in kilogram divided by height in meter squared

17 <sup>g</sup> Defined as <90 cm M; <80 cm F

18 <sup>h</sup> Defined as ≥90 cm M; ≥80 cm F

19  
20  
21  
22  
23  
24  
25  
26  
27  
28  
29  
30  
31  
32  
33  
34  
35  
36  
37  
38  
39  
40  
41  
42  
43

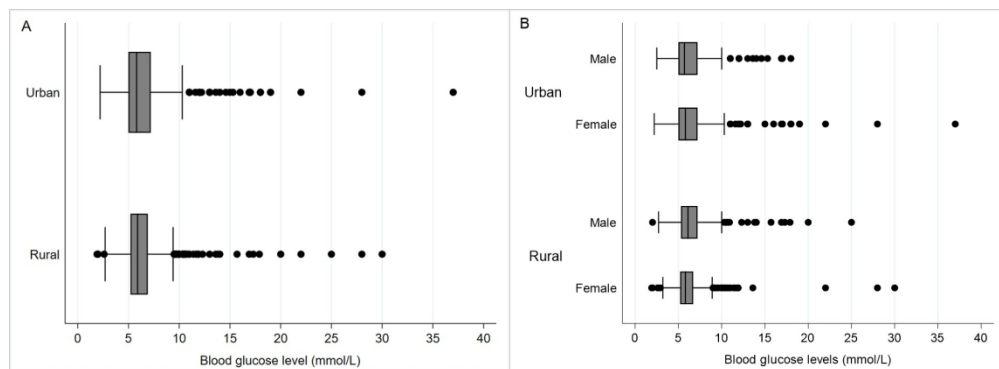

Figure 1: Urban and Rural differences in the distribution of blood glucose levels based on random capillary blood measurement among (A) All Participants, and (B) Men and Women (n = 1819)

327x119mm (150 x 150 DPI)

1  
2  
3  
4  
5  
6  
7  
8  
9  
10  
11  
12  
13  
14  
15  
16  
17  
18  
19  
20  
21  
22  
23  
24  
25  
26  
27  
28  
29  
30  
31  
32  
33  
34  
35  
36  
37  
38  
39  
40  
41  
42  
43  
44  
45  
46  
47  
48  
49  
50  
51  
52  
53  
54  
55  
56  
57  
58  
59  
60

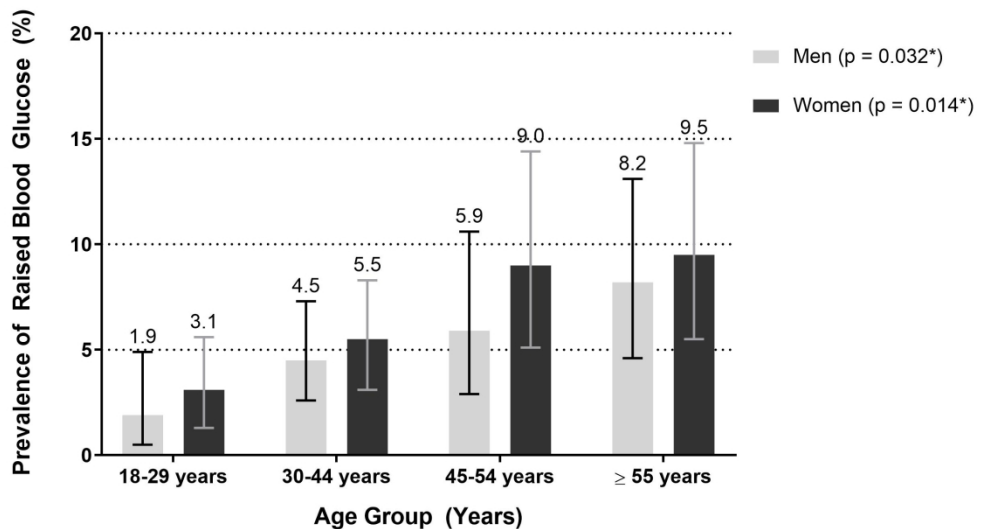

\*Exact test p-value to assess the relationship between prevalence of raised blood glucose and age group stratified by sex

Figure 2: Prevalence of hyperglycemia among Bangladeshi adults aged 18 years and above by sex and age group, 2015 (n = 1819)

211x137mm (300 x 300 DPI)

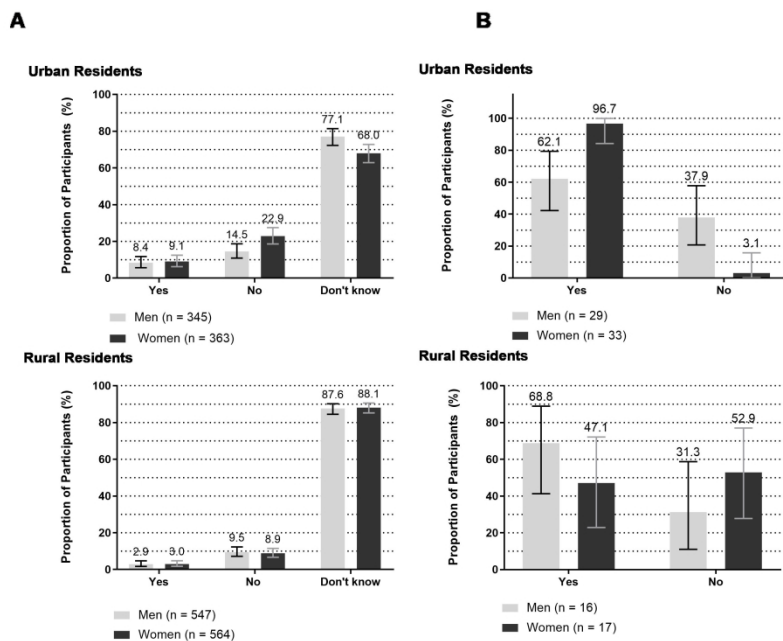

Figure 3: Bangladeshi adults aged 18 years and above with (A) self-reported diabetes and (B) self-reported diabetics on diabetes medications, 2015

284x190mm (300 x 300 DPI)

1  
2  
3  
4  
5  
6  
7  
8  
9  
10  
11  
12  
13  
14  
15  
16  
17  
18  
19  
20  
21  
22  
23  
24  
25  
26  
27  
28  
29  
30  
31  
32  
33  
34  
35  
36  
37  
38  
39  
40  
41  
42  
43  
44  
45  
46  
47  
48  
49  
50  
51  
52  
53  
54  
55  
56  
57  
58  
59  
60

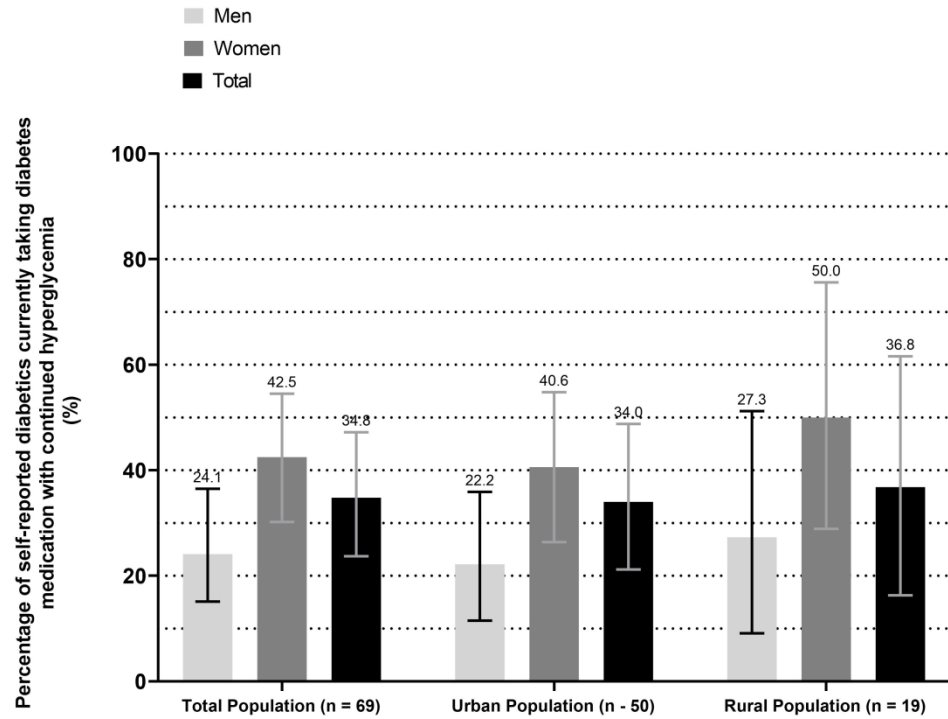

Figure 4: Self-reported diabetics aged 18 years or older who take diabetes medication with hyperglycemia on study measurement ( $\geq 11.0\text{mmol/L}$ )

284x210mm (300 x 300 DPI)

**STROBE 2007 (v4) Statement—Checklist of items that should be included in reports of *cross-sectional studies***

| Section/Topic                | Item # | Recommendation                                                                                                                                                                       | Reported on page # |
|------------------------------|--------|--------------------------------------------------------------------------------------------------------------------------------------------------------------------------------------|--------------------|
| <b>Title and abstract</b>    | 1      | (a) Indicate the study's design with a commonly used term in the title or the abstract                                                                                               | 2                  |
|                              |        | (b) Provide in the abstract an informative and balanced summary of what was done and what was found                                                                                  | 2-3                |
| <b>Introduction</b>          |        |                                                                                                                                                                                      |                    |
| Background/rationale         | 2      | Explain the scientific background and rationale for the investigation being reported                                                                                                 | 5-6                |
| Objectives                   | 3      | State specific objectives, including any prespecified hypotheses                                                                                                                     | 6                  |
| <b>Methods</b>               |        |                                                                                                                                                                                      |                    |
| Study design                 | 4      | Present key elements of study design early in the paper                                                                                                                              | 6                  |
| Setting                      | 5      | Describe the setting, locations, and relevant dates, including periods of recruitment, exposure, follow-up, and data collection                                                      | 7                  |
| Participants                 | 6      | (a) Give the eligibility criteria, and the sources and methods of selection of participants                                                                                          | 6                  |
| Variables                    | 7      | Clearly define all outcomes, exposures, predictors, potential confounders, and effect modifiers. Give diagnostic criteria, if applicable                                             | 8-9                |
| Data sources/<br>measurement | 8*     | For each variable of interest, give sources of data and details of methods of assessment (measurement). Describe comparability of assessment methods if there is more than one group | 7-10               |
| Bias                         | 9      | Describe any efforts to address potential sources of bias                                                                                                                            | 6-7 & 11           |
| Study size                   | 10     | Explain how the study size was arrived at                                                                                                                                            | 7                  |
| Quantitative variables       | 11     | Explain how quantitative variables were handled in the analyses. If applicable, describe which groupings were chosen and why                                                         | 9-10               |
| Statistical methods          | 12     | (a) Describe all statistical methods, including those used to control for confounding                                                                                                | 11                 |
|                              |        | (b) Describe any methods used to examine subgroups and interactions                                                                                                                  | 11                 |
|                              |        | (c) Explain how missing data were addressed                                                                                                                                          | N/A                |
|                              |        | (d) If applicable, describe analytical methods taking account of sampling strategy                                                                                                   | N/A                |
|                              |        | (e) Describe any sensitivity analyses                                                                                                                                                | N/A                |
| <b>Results</b>               |        |                                                                                                                                                                                      |                    |

|                          |     |                                                                                                                                                                                                              |       |
|--------------------------|-----|--------------------------------------------------------------------------------------------------------------------------------------------------------------------------------------------------------------|-------|
| Participants             | 13* | (a) Report numbers of individuals at each stage of study—eg numbers potentially eligible, examined for eligibility, confirmed eligible, included in the study, completing follow-up, and analysed            | 7     |
|                          |     | (b) Give reasons for non-participation at each stage                                                                                                                                                         | 7     |
|                          |     | (c) Consider use of a flow diagram                                                                                                                                                                           | N/A   |
| Descriptive data         | 14* | (a) Give characteristics of study participants (eg demographic, clinical, social) and information on exposures and potential confounders                                                                     | 12    |
|                          |     | (b) Indicate number of participants with missing data for each variable of interest                                                                                                                          | N/A   |
| Outcome data             | 15* | Report numbers of outcome events or summary measures                                                                                                                                                         |       |
| Main results             | 16  | (a) Give unadjusted estimates and, if applicable, confounder-adjusted estimates and their precision (eg, 95% confidence interval). Make clear which confounders were adjusted for and why they were included | 12    |
|                          |     | (b) Report category boundaries when continuous variables were categorized                                                                                                                                    | 9     |
|                          |     | (c) If relevant, consider translating estimates of relative risk into absolute risk for a meaningful time period                                                                                             | N/A   |
| Other analyses           | 17  | Report other analyses done—eg analyses of subgroups and interactions, and sensitivity analyses                                                                                                               | 11    |
| <b>Discussion</b>        |     |                                                                                                                                                                                                              |       |
| Key results              | 18  | Summarise key results with reference to study objectives                                                                                                                                                     | 12-14 |
| Limitations              | 19  | Discuss limitations of the study, taking into account sources of potential bias or imprecision. Discuss both direction and magnitude of any potential bias                                                   | 17-18 |
| Interpretation           | 20  | Give a cautious overall interpretation of results considering objectives, limitations, multiplicity of analyses, results from similar studies, and other relevant evidence                                   | 15-18 |
| Generalisability         | 21  | Discuss the generalisability (external validity) of the study results                                                                                                                                        | 17    |
| <b>Other information</b> |     |                                                                                                                                                                                                              |       |
| Funding                  | 22  | Give the source of funding and the role of the funders for the present study and, if applicable, for the original study on which the present article is based                                                | 20    |

\*Give information separately for cases and controls in case-control studies and, if applicable, for exposed and unexposed groups in cohort and cross-sectional studies.

**Note:** An Explanation and Elaboration article discusses each checklist item and gives methodological background and published examples of transparent reporting. The STROBE checklist is best used in conjunction with this article (freely available on the Web sites of PLoS Medicine at <http://www.plosmedicine.org/>, Annals of Internal Medicine at <http://www.annals.org/>, and Epidemiology at <http://www.epidem.com/>). Information on the STROBE Initiative is available at [www.strobe-statement.org](http://www.strobe-statement.org).



# BMJ Open

## Prevalence and determinants of hyperglycemia among adults in Bangladesh: results from a population-based national survey

|                                 |                                                                                                                                                                                                                                                                                                                                                                                                                                                                                                                                          |
|---------------------------------|------------------------------------------------------------------------------------------------------------------------------------------------------------------------------------------------------------------------------------------------------------------------------------------------------------------------------------------------------------------------------------------------------------------------------------------------------------------------------------------------------------------------------------------|
| Journal:                        | <i>BMJ Open</i>                                                                                                                                                                                                                                                                                                                                                                                                                                                                                                                          |
| Manuscript ID                   | bmjopen-2019-029674.R2                                                                                                                                                                                                                                                                                                                                                                                                                                                                                                                   |
| Article Type:                   | Research                                                                                                                                                                                                                                                                                                                                                                                                                                                                                                                                 |
| Date Submitted by the Author:   | 29-Jun-2019                                                                                                                                                                                                                                                                                                                                                                                                                                                                                                                              |
| Complete List of Authors:       | Islam, Jessica; World Health Organization Country Office for Bangladesh, ; University of North Carolina at Chapel Hill Gillings School of Global Public Health, Department of Epidemiology<br>Zaman, MM; World Health Organization, Dhaka, Bangladesh,<br>Bhuiyan, Mahfuz; World Health Organization Country Office for Bangladesh<br>Haq, Syed; Bangabandhu Sheikh Mujib Medical University, Rheumatology<br>Ahmed, Shamim; Bangabandhu Sheikh Mujib Medical University<br>Al-Qadir, Zahid; Bangabandhu Sheikh Mujib Medical University |
| <b>Primary Subject Heading</b>: | Epidemiology                                                                                                                                                                                                                                                                                                                                                                                                                                                                                                                             |
| Secondary Subject Heading:      | Diabetes and endocrinology, Global health                                                                                                                                                                                                                                                                                                                                                                                                                                                                                                |
| Keywords:                       | non-communicable diseases, chronic disease, raised blood glucose, Bangladesh                                                                                                                                                                                                                                                                                                                                                                                                                                                             |
|                                 |                                                                                                                                                                                                                                                                                                                                                                                                                                                                                                                                          |

SCHOLARONE™  
Manuscripts

1  
2  
3 1 Prevalence and determinants of hyperglycemia among adults in Bangladesh: results from a  
4  
5 2  
6  
7  
8  
9

3 Jessica Y. Islam<sup>1,2</sup>, M. Mostafa Zaman<sup>\*2</sup>, Mahfuzur Rahman Bhuiyan<sup>2</sup>, Syed Atiqul Haq<sup>3</sup>,  
4 Shamim Ahmed<sup>3</sup>, Zahid- Al- Quadir<sup>3</sup>

5 <sup>1</sup>Department of Epidemiology, UNC Gillings School of Global Public Health, Chapel Hill, NC;  
6 Email: [islamjy@email.unc.edu](mailto:islamjy@email.unc.edu)

7 <sup>2</sup>World Health Organization, Dhaka, Bangladesh; Email: [zamanm@who.int](mailto:zamanm@who.int); Email:  
8 [mahfuzdoc@gmail.com](mailto:mahfuzdoc@gmail.com)

9 <sup>3</sup>Department of Rheumatology, Bangabandhu Sheikh Mujib Medical University, Shahbag,  
10 Dhaka, Bangladesh. Email: [haqsyedatiqul@gmail.com](mailto:haqsyedatiqul@gmail.com); Email: [dr\\_shamim\\_ahmed@yahoo.com](mailto:dr_shamim_ahmed@yahoo.com);  
11 Email: [drzahid1981@yahoo.com](mailto:drzahid1981@yahoo.com)

12 **Corresponding Author:**

13 Jessica Yasmine Islam, MPH  
14 The University of North Carolina at Chapel Hill  
15 Gillings School of Global Public Health  
16 Department of Epidemiology  
17 Chapel Hill, NC, USA 27599-7400  
18 Email: [islamjy@email.unc.edu](mailto:islamjy@email.unc.edu)

19  
20  
21 **Manuscript word count: 4,200**  
22  
23  
24  
25  
26  
27  
28  
29

## 30 **Abstract**

31 Objectives: With the increasing burden of non-communicable diseases in low- and middle-  
32 income countries, biological risk factors such as hyperglycemia are a major public health  
33 concern in Bangladesh. Hyperglycemia is an excess of glucose in the bloodstream and is often  
34 associated with type-2 diabetes mellitus. Nationally representative data of hyperglycemia  
35 prevalence starting from age  $\geq 18$  years are currently unavailable for Bangladeshi adults. The  
36 objective of this study was to assess the prevalence and determinants of hyperglycemia among  
37 adults in Bangladesh aged  $\geq 18$  years.

38  
39 Study Design: Cross-sectional, population-based study

40  
41 Setting and Participants: Data for this analysis were collected in November-December of 2015,  
42 from a population-based nationally representative sample of 1843 adults, aged  $\geq 18$  years, from  
43 both urban and rural areas of Bangladesh. Demographic information, capillary blood glucose,  
44 blood pressure, height, weight, waist circumference, and treatment history were recorded.

45  
46 Primary Outcome Measures: Hyperglycemia was defined as a random capillary blood glucose  
47 level of  $\geq 11.1$  mmol/L (i.e. in the diabetic range) or currently taking medication to control type-2  
48 diabetes, based on self-report.

49  
50 Results: Overall, the prevalence of hyperglycemia was 5.5% (95% CI: 4.5-6.6) and was  
51 significantly higher among urban (9.8%, 95% CI: 7.7-12.2) than rural residents (2.8%, 95% CI:  
52 1.9-3.9). The age-standardized prevalence of hyperglycemia was 5.6% (95% CI: 4.6-6.8).  
53 Among both urban and rural residents, the associated determinants of hyperglycemia included  
54 hypertension and abdominal obesity. About 5% of the total population self-reported to have

1  
2  
3 55 been previously diagnosed with type-2 diabetes; among these adults, over 25% were not taking  
4  
5 56 medications to control their diabetes.  
6

7 57 Conclusions: Our study found that about 1 out of 20 Bangladeshi adults aged  $\geq 18$  years have  
8  
9 58 hyperglycemia. To control and prevent the development of type-2 diabetes, data from this study  
10  
11 59 can be used to inform public health programming and provide descriptive information on  
12  
13 60 surveillance of progress towards controlling diabetes in Bangladesh.  
14

15  
16 61

17  
18 62 **Keywords:** non-communicable diseases, Bangladesh, hyperglycemia, diabetes, chronic  
19  
20 63 disease  
21

22 64

23  
24 65

25  
26 66

27  
28 67

29  
30 68

31  
32 69

33  
34 70

35  
36 71

37  
38 72

39  
40 73

41  
42 74

43  
44 75

45  
46 76

47  
48 77

49  
50 78

51  
52 79

53  
54 80

55  
56  
57  
58  
59  
60

## Article Summary

### Strengths and Limitations of the Study

- This study utilized a multistage, geographically clustered, probability-based sampling approach to produce nationally representative data for Bangladesh.
- Currently, nationally representative data for the prevalence of hyperglycemia in the diabetic range is unavailable for adults aged 18-29 years. A strength of our study is that we included Bangladeshi adults aged 18 years and above to obtain novel data on the prevalence of hyperglycemia, and relevant non-communicable disease risk factors
- We were able to estimate the prevalence of hyperglycemia using capillary blood glucose measured at random. However, we were unable to measure the prevalence of prediabetes and diabetes as we did not obtain blood sugar levels using standardized methods, such as fasting blood glucose or 2-hour post-prandial measurements.
- Due to the cross-sectional nature of the study design, we were unable to assess temporality of risk factors identified and our outcomes of interest.
- We assessed type-2 diabetes medication history based on self-report and we were able to obtain medicine strips or vials records or prescription records of participants to confirm the self-reported data.

## 108 **Background**

109 Globally, diabetes mellitus (DM), characterized by hyperglycemia, is a leading cause of  
110 premature mortality and disability. Globally, almost half of all deaths attributable to high blood  
111 glucose occur before the age of 70 years, and the WHO estimates that diabetes was the  
112 seventh leading cause of mortality in 2016. The global prevalence of DM has been on the rise  
113 over the past several decades<sup>1,2</sup>. Estimates reflect the global prevalence of diabetes has nearly  
114 doubled among adults aged 18 years and above, rising from 4.7% in 1980 to 8.5% in 2014<sup>3</sup>.  
115 This growing burden is most prominent in low- and middle-income countries particularly the  
116 Indian sub-continent<sup>4</sup>, which accounts for close to one-fifth of all diabetes cases worldwide. The  
117 prevalence of diabetes in this region is projected to increase by 71% by 2035<sup>5</sup>. In Bangladesh,  
118 specifically, the International Diabetes Federation projects the prevalence of diabetes will  
119 increase to more than 50% in the next 15 years<sup>5</sup>.

120 The increasing prevalence of diabetes among Bangladeshi adults over the past few  
121 decades has been documented: Based on a meta-analysis of studies conducted from 1995 –  
122 2010, the prevalence of diabetes among Bangladeshi adults aged 30 years and above  
123 increased from 4% in 1995 to 2000 and 5% in 2001 to 2005 to 9% in 2006 to 2010<sup>6</sup>. Studies to  
124 assess the burden of diabetes have been conducted in Bangladesh in both urban and rural  
125 populations over the last decades<sup>7</sup>. However, national data on the prevalence of diabetes or  
126 hyperglycemia in the diabetic range starting at age 18 years are currently unavailable<sup>7-10</sup>. These  
127 data are valuable for monitoring progress made towards one of the nine global non-  
128 communicable disease (NCD) targets of the year 2025, set forth by the World Health  
129 Organization's (WHO) NCD Global Monitoring Framework: To observe a 0% increase in age-  
130 standardized prevalence of hyperglycemia or diabetes among persons aged  $\geq 18$  years<sup>11</sup>. As  
131 such in response to the WHO Global Action Plan for the Prevention and Control of NCDs<sup>12</sup>,  
132 descriptive epidemiological data on the burden of hyperglycemia among adults starting at 18  
133 years are needed to monitor the national progress of interventions implemented to reduce the

1  
2  
3 134 burden of DM in Bangladesh<sup>13-15</sup>. Here, using a nationally representative sample, we present  
4  
5 135 data on prevalence and determinants of hyperglycemia by various sociodemographic factors  
6  
7 136 such as age, sex, and area of residence among Bangladeshi adults aged 18 years and above,  
8  
9 137 residing in both urban and rural areas of the country. Additionally, we explore treatment patterns  
10  
11 138 and control of hyperglycemia among participants in our sample of Bangladeshi adults.  
12  
13  
14 139

## 15 16 140 **Methods**

17  
18 141 Data for this analysis were collected as part of a national assessment of the burden of  
19  
20 142 musculoskeletal disorders in Bangladesh conducted by investigators from the Bangabandhu  
21  
22 143 Sheikh Mujib Medical University (BSMMU) with technical assistance from the WHO Country  
23  
24 144 Office for Bangladesh, as previously described<sup>16</sup>. The study was a population-based cross-  
25  
26 145 sectional study carried out from November to December 2015 and followed the WHO STEP-  
27  
28 146 wise approach to Surveillance of NCD risk factors (STEPS)<sup>17</sup>. The target population of this  
29  
30 147 survey was men and women aged  $\geq 18$  years residing in rural and urban areas of Bangladesh.  
31  
32 148 The exclusion criteria included tourists and the institutionalized, including residents of hospitals,  
33  
34 149 prisons, nursing homes, and army barracks.  
35  
36  
37 150

### 38 39 151 Sampling Methods

40  
41 152 To obtain a population-based sample of Bangladesh, this survey adopted a multistage,  
42  
43 153 geographically clustered, probability-based sampling approach. Population statistics were  
44  
45 154 obtained using the updated national census conducted by the Bangladesh Bureau of Statistics  
46  
47 155 (BBS) in 2009<sup>18</sup>. To obtain our primary sampling unit (PSU), we utilized the following  
48  
49 156 geographical distribution described: In Bangladesh, there are seven divisions, which are the  
50  
51 157 largest administrative units of the country. Each division is divided into several districts (*Zila*)  
52  
53 158 and within each district, there are several sub-districts (*Upazila*). Within sub-districts, *mauzas*  
54  
55 159 and *mahallas* (commonly known as neighborhoods or blocks) are the smallest units within  
56  
57  
58  
59  
60

1  
2  
3 160 defined territories in rural and urban areas respectively. *Mauzas* and *mahallas* were considered  
4  
5 161 the PSU for the study's sampling approach. The households within the *mauzas* and *mahallas*  
6  
7 162 were the secondary sampling units. We utilized the BBS' definition of a household which is as  
8  
9 163 follows: "a dwelling in which persons either related or unrelated were living together and taking  
10  
11 164 food from the same kitchen"<sup>18</sup>.  
12  
13  
14 165

### 166 Sample size estimation

17  
18 167 The power analysis and sample size calculations were completed based on the  
19  
20 168 standardized approach outlined in the WHO STEPS methodology<sup>17</sup>. Using the WHO STEPS  
21  
22 169 methodology, the minimum number of participants required was 296 in each group (rural males,  
23  
24 170 rural females, urban males, and urban females). Assuming a design effect of 1.5 adjusted within  
25  
26 171 cluster population homogeneity, the necessary sample size was 1776. We assumed a response  
27  
28 172 rate of 90% and determined we would need to contact at least 1973 adults. For simplicity, our  
29  
30 173 target sample size was 2000. Twenty PSUs (8 urban and 12 rural) were randomly selected from  
31  
32 174 7 divisions of the country, with the probability proportional to the population size of each  
33  
34 175 division. In each PSU, 100 consecutive households were selected. The even numbered  
35  
36 176 households were designated as a "male household" and odd numbered households as a  
37  
38 177 "female household." Finally, one male or female was approached to participate from each  
39  
40 178 respective household as designated.  
41  
42  
43 179

### 45 180 Data collection

46  
47 181 Through a structured survey, we collected data on the following topics: musculoskeletal  
48  
49 182 disorders<sup>19</sup>, health history, and demographic data such as age, area of residence, education,  
50  
51 183 current (last 12 months) occupation, tobacco use, and physical activity. Physical measurements  
52  
53 184 such as height, weight, waist circumference, blood glucose levels, and blood pressure were  
54  
55 185 collected. To measure blood glucose levels, we obtained random blood glucose samples<sup>3</sup>, per  
56  
57  
58  
59  
60



1  
2  
3 186 the clinical guidelines of diabetes diagnostic criteria of Bangladesh<sup>20</sup>. Capillary blood samples  
4  
5 187 were consistently taken from the index finger of the right arm using a glucometer, namely Accu-  
6  
7 188 chek Advantage (Roche Diagnostics Division, Grenzacherstrasse, Switzerland).  
8

9  
10 189 Each participant's history of diabetes was assessed based on self-report. Specifically,  
11  
12 190 participants were asked: 1. Have you ever been diagnosed with diabetes by a health care  
13  
14 191 professional? 2. If yes, are you receiving treatment for diabetes? Treatment history of diabetes  
15  
16 192 was confirmed by prescription, including medicine strips or insulin injection vials, or medical  
17  
18 193 records. The questionnaire was translated from English to Bengali, adapted and validated per  
19  
20 194 standard procedure. Data collection procedures were standardized across study sites through  
21  
22 195 coordinated training of field staff conducted by epidemiologists, study physicians, and WHO  
23  
24 196 staff members.  
25

26 197 Blood pressure was measured by a trained field interviewer using the LifeSource UA-  
27  
28 198 767+ blood pressure monitor, as recommended by the WHO, and appropriately sized arm cuffs.  
29  
30 199 Blood pressure measurements were consistently taken on each participant's right arm at the  
31  
32 200 level of the heart and elbow-assisted, while the participant was in a seated position. The initial  
33  
34 201 measurement was performed after five minutes of rest. After two minutes, the second  
35  
36 202 measurement was taken. The mean of these two blood pressure readings was utilized as the  
37  
38 203 final blood pressure for each participant.  
39  
40

41 204 Following data collection, participants scheduled a visit with the study research physician  
42  
43 205 within the following five days. The research physician assessed the participant's medical history,  
44  
45 206 either through self-report or using medical records when possible. Study physicians examined  
46  
47 207 each participant to confirm the results of data collection through classical symptom assessment.  
48  
49 208 When necessary, the participant was also evaluated by the divisional investigator for a second  
50  
51 209 opinion of relevant diagnoses.  
52

53  
54 210

55  
56 211 Patient and public involvement  
57

1  
2  
3 212 There was no patient or public involvement in the implementation of this study or interpretation  
4  
5 213 of analytic results.  
6

7 214

9 215 Outcome definitions

11 216 Our primary outcome of interest was the prevalence of hyperglycemia. We utilized the  
12  
13 217 American Diabetes Association (ADA) guidelines to define a diagnosis of hyperglycemia using  
14  
15 218 random or casual plasma glucose test and symptom review by the study physician <sup>21</sup>. An  
16  
17 219 individual was considered to have hyperglycemia if the plasma glucose level was 11.1 mmol/L  
18  
19 220 or higher (i.e. in the diabetic range) and/or if they self-reported to take diabetes medication. Our  
20  
21 221 secondary outcome of interest was the prevalence of self-reported type-2 diabetes mellitus. An  
22  
23 222 individual was categorized as diabetic if they self-reported to have been previously diagnosed  
24  
25 223 with diabetes by a health care provider.  
26  
27

28 224

30 225 Covariates

32 226 The following variables were assessed as covariates for analysis: area of residence,  
33  
34 227 sex, age, education, occupation, wealth index, body mass index (BMI), BP, and waist  
35  
36 228 circumference. Education was categorized into four groups: no education, primary education  
37  
38 229 (completed grade  $\leq 5$ ), secondary education (completed  $\leq$  grade 10), and above secondary  
39  
40 230 education (completed  $\geq$  grade 12). Each participant's occupation was categorized into five  
41  
42 231 groups, including: professional employment (field staff, police officer, guard, doctor, engineer,  
43  
44 232 professional, businessman, desk job), unemployed or retired, industrial worker or day laborer,  
45  
46 233 housewife, and other (shop keeper, weaver, driver, student, beggar, cook, carpenter, tailor,  
47  
48 234 migrant workers and fishermen).  
49

51 235 Data on physical activity was collected based on self-report. First, respondents were  
52  
53 236 asked the number of days they engaged in vigorous, moderate, or light physical activity  
54  
55 237 throughout a typical week. The following definitions were used to define (1) vigorous, (2)

1  
2  
3 238 moderate, and (3) light physical activity, respectively: (1) vigorous activity was defined as any  
4  
5 239 activity that caused a large increase in breathing or heart rate, if continued for at least 10  
6  
7 240 minutes (e.g. running, carrying heavy loads, digging or construction work); (2) moderate activity  
8  
9 241 was defined as any activity that caused a small increase in breathing or heart rate, if continued  
10  
11 242 for at least 10 minutes (brisk walking or carrying light loads); and (3) light physical activity was  
12  
13 243 defined as activities such as office work. Next, we asked participants to estimate how many  
14  
15 244 minutes per day they engaged in the activity. Metabolic equivalent of task (MET)-minute was  
16  
17 245 calculated using the STEPS protocol<sup>22</sup> as follows: one minute of light activity was equivalent to 1  
18  
19 246 MET-minute; one minute in moderate-intensity activities was equivalent to 4 MET-minutes, and  
20  
21 247 one minute of vigorous-intensity was equivalent to 8 MET-minutes. Physical activity was then  
22  
23 248 categorized based on total MET-minutes per week. Participants who spent 3000 or more MET-  
24  
25 249 minutes per week were categorized in the vigorous physical activity group, 600-3000 MET-  
26  
27 250 minutes were categorized as moderate physical activity, and <600 MET-minutes were  
28  
29 251 categorized as low physical activity.  
30  
31

32  
33 252 The wealth index was constructed using principal component analysis. Asset information  
34  
35 253 collected covered information on household ownership of nineteen items, including electricity,  
36  
37 254 flush toilet, land telephone, cell phone, television, radio, refrigerator, car, motorcycle, washing  
38  
39 255 machine, bicycle, sewing machine, wardrobe, table, bed or cot, chair or bench, watch or clock.  
40  
41 256 Additionally, we assessed the main type of material used to build each participant's home (i.e.  
42  
43 257 cement, tin, bamboo, or thatched straw). Each asset was assigned a weight (factor score)  
44  
45 258 generated through principal components analysis, and the resulting asset scores were  
46  
47 259 standardized to a normal distribution with a mean of zero and standard deviation of one. Each  
48  
49 260 household was then assigned a score for each asset, and the scores were summed up;  
50  
51 261 individuals were ranked according to the total score of the household in which they resided. The  
52  
53 262 sample was then divided into quartiles from quartile one (lowest) to quartile four (highest).  
54  
55  
56  
57  
58  
59  
60

1  
2  
3 263 Using height (centimeters) and weight (kilograms) measurements, we calculated BMI  
4  
5 264 (height/weight<sup>2</sup>). BMI was categorized in the following groups: underweight ( $\leq 18.5$ ), normal  
6  
7 265 ( $\leq 25$ ), overweight (25.1-30) and obese ( $>30$ ). Waist circumference was measured in centimeters  
8  
9 266 (cm). Participants were categorized as abdominally obese if waist circumference was 90 cm and  
10  
11 267 above for men, or 80 cm and above for women. Prehypertension was defined as SBP  $\geq 120$   
12  
13 268 mmHg but  $< 140$  mmHg and/or DBP  $\geq 80$  mmHg but  $< 90$  mmHg and not taking antihypertensive  
14  
15 269 medication at the time of the survey. We utilized the WHO's guidelines for cut-off points to  
16  
17 270 define hypertension<sup>23</sup>. An individual was considered to have hypertension if systolic blood  
18  
19 271 pressure (SBP) was  $\geq 140$  mmHg (millimeters of mercury) and/or, diastolic blood pressure (DBP)  
20  
21 272  $\geq 90$  mmHg, and/or taking antihypertensive medication based on self-report.  
22  
23  
24 273

#### 25 26 274 Age-Standardized Prevalence Estimates

27  
28 275 To facilitate comparison of overall hyperglycemia among Bangladeshi adults across  
29  
30 276 global populations with different age compositions we calculated age-standardized prevalence  
31  
32 277 estimates with 95% confidence intervals (CIs) using the WHO's World Standard Population <sup>24</sup>.  
33  
34 278 The World Standards database (WHO 2000-2025) provided population estimates for 18 and 19  
35  
36 279 age groups, as well as single year ages. To derive single ages from the 5-year age group  
37  
38 280 proportions publically available, we used the Beers "Ordinary" Formula<sup>25</sup>. The following formula  
39  
40 281 was utilized for standardization:  
41  
42

43 282  $\sum p_i * w_i / \sum w_i$ , where p = observed prevalence and w = world population weight.  
44  
45 283

#### 46 47 284 Data Analysis

48  
49 285 Sociodemographic variables were presented with mean and standard deviation (SD) for  
50  
51 286 continuous variables, and using proportions for categorical variables. For bivariate analyses,  
52  
53 287 study participants were divided by sex and into four age groups (18-29, 30-44, 45-54 and  $\geq 55$   
54  
55  
56  
57  
58  
59  
60

288 years). We calculated the prevalence of our primary outcome by key demographic variables and  
289 calculated 95% CIs using the binomial exact method.

290 To estimate determinants of hyperglycemia in the diabetic range, we computed  
291 prevalence ratios with Poisson regression using robust estimation of standard errors<sup>26-28</sup>.  
292 Potential variables for inclusion in the model were assessed using prior published literature and  
293 bivariate Poisson regression analysis; an arbitrary p-value of <0.10 was used as criteria to  
294 include the variable in the multivariable Poisson regression model to control for confounding  
295 effects. For multivariable Poisson regression models, adjusted prevalence ratios (aPR), and  
296 95% CIs for each independent variable were calculated. Additionally, <0.05 was used as the  
297 level of significance. Multivariable Poisson regression models were generated separately for  
298 urban and rural participants to account for possible effect measure modification. Collinearity was  
299 assessed using the variance inflation factor to ensure a strong linear relationship among  
300 independent variables included in the model was not present. All statistical procedures were  
301 performed using Stata/SE 15.0 (StataCorp LP, Texas, USA) software package.

302

## 303 **Results**

### 304 Background Characteristics

305 Of the 2000 adults approached, 1843 agreed to participate in our study leading to a  
306 response rate of 92.1%. Twenty-four female participants were pregnant and were dropped from  
307 subsequent analyses to ensure those with gestational diabetes were not included. Additionally,  
308 no participants reported having been previously diagnosed with type-1 diabetes. There were  
309 892 (49.0%) male and 927 (50.9%) female respondents (Table 1). The age of our participants  
310 ranged from 18 to 90 years. The mean age and education level of participants were 40.5 (SD =  
311 14.7) years and 5.7 (SD = 5.1) years, respectively. The majority of the study population was  
312 married (88.0%) and employed as either an industrial worker/day laborer (26.5%) or housewife  
313 (39.9%). Almost half of participants never used some form of tobacco. The majority of

1  
2  
3 314 participants engaged in vigorous physical activity over an average week (69.3%). The mean  
4  
5 315 BMI was 22.1 (SD = 4.1) and the mean waist circumference was 78.4 cm (SD = 11.6). Overall,  
6  
7 316 the mean systolic blood pressure was 116.1 mmHg (SD = 17.1) and diastolic blood pressure  
8  
9 317 was 76.1 mmHg (SD = 10.5). The mean blood glucose level was 6.4 mmol/L (SD = 2.4). Figure  
10  
11 318 1 presents the distribution of blood glucose levels by various demographic factors.  
12  
13  
14 319

### 15 16 320 Prevalence and Risk Factors for Hyperglycemia

17  
18 321 The prevalence of hyperglycemia was 5.5% (95% CI: 4.5-6.6). This prevalence was  
19  
20 322 significantly higher among urban participants (9.8%, 95%CI: 7.7-12.2) than rural participants  
21  
22 323 (2.8%, 95% CI: 1.9-3.9) (Table 2) and increased as age increased (Figure 2). The highest  
23  
24 324 prevalence of hyperglycemia was observed among those aged  $\geq 55$  years, at 8.2% (95% CI: 4.6-  
25  
26 325 13.1) among men and 9.4% (95% CI: 5.4-14.8) among women. The age-standardized  
27  
28 326 prevalence of hyperglycemia was 5.6% (95% CI: 4.6-6.8). The age-standardized prevalence of  
29  
30 327 hyperglycemia among urban and rural residents was 10.5% (95% CI: 9.2-12.1) and 2.8% (95%  
31  
32 328 CI: 2.1-3.7), respectively. Among men and women, the age-standardized prevalence of  
33  
34 329 hyperglycemia was 4.9% (95% CI: 3.9-6.0) and 6.0% (95% CI: 4.9-7.2), respectively.  
35  
36  
37 330

### 38 39 331 Self-Reported Diabetes Mellitus and Hyperglycemia

40  
41 332 Ninety-five participants (5.2%) self-reported to have been previously diagnosed with  
42  
43 333 type-2 diabetes by a health care provider. However, 25 of those participants did not meet our  
44  
45 334 criteria of diagnosis of hyperglycemia as they did not take medication to control their diabetes  
46  
47 335 and their plasma glucose was below 11.1 mmol/L. Therefore, 69.3% of those with  
48  
49 336 hyperglycemia, per the study definition, were previously diagnosed with diabetes by a health  
50  
51 337 care provider.  
52

53  
54 338 The proportion of men and women who were previously diagnosed with diabetes by a  
55  
56 339 health care provider based on self-report was higher among urban residents (men: 8.4%;

1  
2  
3 340 women: 9,1%) than among rural residents (men: 2.9%; women: 3.0%) (Figure 3a). However,  
4  
5 341 overall, the large majority (81.8%) reported they did not know if they had been previously  
6  
7 342 diagnosed with diabetes; this proportion was higher among rural residents (87.8%) than urban  
8  
9 343 residents (72.2%).

11 344 Among participants previously diagnosed with type-2 diabetes based on self-report,  
12  
13 345 72.6% reported taking medication to control their diabetes (Table 1). Urban women more  
14  
15 346 frequently (96.7%) self-reported to take diabetes medication than urban men (62.1%) (Figure  
16  
17 347 3b). We were able to confirm 100% of participant's self-reported diabetes treatment history by  
18  
19 348 checking prescriptions or medicine strips/vials.

22 349 Among participants who were categorized as hyperglycemic during study measurement,  
23  
24 350 over one-third (37.9%) of urban men self-reported to have diabetes, however, they did not take  
25  
26 351 any medication to control their diabetes. Among rural participants, the proportion of women who  
27  
28 352 did not take medication to control their self-reported diabetes was higher (52.9%) than men  
29  
30 353 (31.3%). Although three-quarters of self-reported diabetic participants reported taking  
31  
32 354 medication to control their diabetes, 31% continued to have high blood sugar levels indicating  
33  
34 355 uncontrolled diabetes at study measurement (Figure 4).  
35  
36  
37  
38

### 39 357 Determinants of Hyperglycemia

41 358 Table 2 presents the results of multivariable Poisson regression with robust variance  
42  
43 359 analyses to identify determinants of hyperglycemia. Among urban participants, those of older  
44  
45 360 age, lowest wealth quartile, hypertension, low physical activity, and with abdominal obesity  
46  
47 361 based on waist circumference, were more likely to have hyperglycemia. The prevalence of  
48  
49 362 hyperglycemia was significantly highest among those aged  $\geq 55$  years (aPR 3.92, 95% CI: 1.48-  
50  
51 363 10.39) compared to individuals aged 18-29 years of age. When compared to those in the 4<sup>th</sup>  
52  
53 364 (highest) wealth quartile, urban residents in the first (lowest) wealth quartile had 3.18 times the  
54  
55 365 prevalence of hyperglycemia. For urban individuals with hypertension, the prevalence of  
56  
57  
58  
59  
60



1  
2  
3 366 hyperglycemia was 2.65 (95% CI:1.30-5.38) times that of individuals without hypertension. The  
4  
5 367 prevalence of hyperglycemia among those with low physical activity was 3.01 (95% CI: 1.42-  
6  
7 368 6.38) times that of urban participants with vigorous physical activity. Abdominal obesity also  
8  
9 369 significantly increased the prevalence of hyperglycemia among urban participants (aPR: 2.54,  
10  
11 370 95% CI: 1.35-4.77). Among rural participants, the only observed determinants of hyperglycemia  
12  
13 371 were hypertension (aPR: 5.39, 95% CI: 1.94-14.96) and abdominal obesity (aPR: 2.95, 95% CI:  
14  
15 372 1.32-6.58).

17 373

## 20 374 **Discussion**

21  
22 375 Using data from this nationally representative sample, we estimate that about one in  
23  
24 376 twenty Bangladeshi adults aged  $\geq 18$  years have hyperglycemia. The prevalence of  
25  
26 377 hyperglycemia was higher among urban residents (9.8%) than rural residents (2.8%).  
27  
28 378 Determinants of hyperglycemia included older age, urban residence, abdominal obesity, low  
29  
30 379 physical activity, and hypertension. As diabetes is characterized by hyperglycemia, targeting  
31  
32 380 high-risk groups identified in this analysis could be prioritized for effective diabetes preventive  
33  
34 381 programs in Bangladesh.

35  
36 382 Bangladesh has adopted the goals and targets set forth by the WHO's Global Monitoring  
37  
38 383 Framework for the Prevention and Control of NCDs for the year 2025<sup>11</sup>. One of these targets is  
39  
40 384 to ensure there is a 0% increase in the age-standardized prevalence of hyperglycemia among  
41  
42 385 adults aged  $\geq 18$  years by the year 2025. To our knowledge, the present study is the first to  
43  
44 386 report national estimates on the prevalence of hyperglycemia starting at age 18 years in both  
45  
46 387 urban and rural areas of Bangladesh. Data gathered from this national-level study are critical  
47  
48 388 towards the measurement of progress towards the WHO's nine global NCD control targets for  
49  
50 389 Bangladesh for 2025.

51  
52 390 Globally, the number of adults living with diabetes has risen from 108 million in 1980 to  
53  
54 391 422 million in 2013, and low- and middle-income countries (LMICs) have seen the most rapid



1  
2  
3 392 rise in diabetes prevalence<sup>3</sup>. Several lifestyle factors have been attributed to the increase in  
4  
5 393 prevalence across LMICs including, globalization of food production, extensive marketing of  
6  
7 394 low-cost and energy-dense foods, increased sedentary behavior, and rapid urbanization<sup>29</sup>. In  
8  
9 395 recent decades, the increase in the prevalence of diabetes in South Asia has been greater than  
10  
11 396 that seen in high-income countries<sup>4</sup>. The prevalence of diabetes in adults across countries in  
12  
13 397 South Asia is similar, excluding Nepal which has a low prevalence in comparison to neighboring  
14  
15 398 countries (8.8% in India, 8.6% in Sri Lanka, 6.9% in Bangladesh, 7.9% in Bhutan, 6.9% in  
16  
17 399 Pakistan, and 4.0% in Nepal)<sup>30</sup>. In our study, we observed a prevalence of 5.6% hyperglycemia  
18  
19 400 in the diabetic range among adults aged 18 years and above. This prevalence is lower than  
20  
21 401 previous studies conducted in Bangladesh and neighboring countries. In fact, a scoping review  
22  
23 402 estimated the pooled prevalence of type-2 diabetes to be 7.4%<sup>7</sup>. Our estimated prevalence was  
24  
25 403 lower due to a younger study population (18 years and above compared to the WHO estimate  
26  
27 404 among adults aged 30 years and above), and a higher percentage of participants from rural  
28  
29 405 areas (61.1%, as is representative of Bangladesh). Indeed, when we restrict our analytic sample  
30  
31 406 to 30 years and above, the prevalence of hyperglycemia is 6.7%, which is similar to the 2017  
32  
33 407 WHO estimate of diabetes (6.9%). Significant heterogeneity in diabetes and its determinants  
34  
35 408 may exist within Bangladesh due to variations in the level of urbanization by region, and  
36  
37 409 socioeconomic status of specific sub-populations<sup>31</sup>.

40  
41 410 Important determinants of hyperglycemia in both urban and rural areas of our  
42  
43 411 assessment included hypertension, low physical activity, and abdominal obesity. Interestingly,  
44  
45 412 there was no association of diabetes identified for increasing BMI. This indicates that abdominal  
46  
47 413 obesity may be a more significant factor to consider than BMI. Prior studies conducted in  
48  
49 414 Bangladesh have also identified a positive association of central (or abdominal) obesity with  
50  
51 415 diabetes<sup>32</sup>. Furthermore, our assessment found a decrease in prevalence of diabetes with  
52  
53 416 increasing wealth quartile. Prior studies have conflicting findings on the risk of diabetes and  
54  
55 417 other NCDs, among the wealthy based on demographic features such as the area of residence.

1  
2  
3 418 One prior study conducted in Bangladesh found that people from the highest wealth quintile  
4  
5 419 were more likely to have diabetes than people from the lowest wealth quintile<sup>33</sup>. However,  
6  
7 420 another found a high burden of selected NCDs, including diabetes, among the lowest wealth  
8  
9 421 quintile populations in rural areas and wealthy populations in urban areas<sup>34</sup>. Further study is  
10  
11 422 warranted to assess the reliability of wealth indices as a measurement of socioeconomic status  
12  
13 423 and wealth among Bangladeshi adults.

14  
15  
16 424 In our study, a high proportion (~70%) of those with hyperglycemia self-reported to have  
17  
18 425 been previously diagnosed with diabetes and therefore, aware of their condition. Additionally,  
19  
20 426 72% reported taking medication to control their diabetes. However, we found that almost one-  
21  
22 427 third of those who self-reported to take medication for their diabetes continued to have  
23  
24 428 hyperglycemia. Efforts should be made to ensure diabetics in Bangladesh are treated for their  
25  
26 429 condition and secondary prevention of complications of diabetes, such as diabetic retinopathy.  
27  
28 430 This is of particular concern in developing countries where resources are limited and cost-  
29  
30 431 effective solutions for chronic disease treatment should be prioritized. A recently published  
31  
32 432 study found that healthcare expenditure in persons with diabetes in Bangladesh is six times  
33  
34 433 higher than in persons without diabetes<sup>14</sup>. Prevention and management of diabetes are likely to  
35  
36 434 be a cost-saving approach for Bangladesh through the utilization of community health workers  
37  
38 435 adequately trained to effectively screen for, and identify, people with diabetes<sup>35</sup>.

39  
40  
41 436 This study has several strengths. Data collected for our study was of a nationally  
42  
43 437 representative sample indicating our results are generalizable to the population of Bangladeshi  
44  
45 438 adults aged 18 years and above. Additionally, due to our large sample size, we were able to  
46  
47 439 conduct subgroup analyses to identify urban and rural differences. However, several limitations  
48  
49 440 should also be considered when interpreting the results of this analysis. We were unable to  
50  
51 441 measure the prevalence of prediabetes and diabetes directly as we did not obtain blood sugar  
52  
53 442 levels using standardized methods, such as fasting blood glucose or 2-hour post-prandial  
54  
55 443 measurements. Further, we did not assess each participant's history of classical symptoms of

1  
2  
3 444 hyperglycemia, which is necessary to diagnose diabetes according to the ADA guidelines<sup>21</sup>. We  
4  
5 445 were unable to measure known determinants of type-2 diabetes factors such as diet or family  
6  
7 446 history of diabetes. Future studies should consider the addition of glycosylated hemoglobin  
8  
9 447 measurement when assessing the prevalence of diabetes as this method could provide a more  
10  
11 448 long-term and stable diagnosis of diabetes mellitus. Finally, due to the cross-sectional nature of  
12  
13 449 this study, we were unable to define temporality of certain determinants of hyperglycemia  
14  
15 450 identified and therefore, unable to assess causality.  
16  
17  
18 451

## 20 452 **Conclusion**

21  
22 453 Data from this nationally-representative sample of Bangladeshi adults aged 18 years  
23  
24 454 and above will be critical to informing the progress of NCD control in Bangladesh per the WHO's  
25  
26 455 Global Monitoring Framework and goals for 2025. As our data were collected in late 2015, more  
27  
28 456 recent studies to estimate the prevalence of diabetes mellitus or hyperglycemia are warranted.  
29  
30 457 Recent changes in risk factor distribution coupled with aging of the population may have led to  
31  
32 458 changes prevalence of diabetes mellitus not reflected in our results, which will be important in  
33  
34 459 measuring our progress as we approach 2025. We found that about one in twenty Bangladeshi  
35  
36 460 adults aged  $\geq 18$  years have hyperglycemia. Among urban residents, we found that about one in  
37  
38 461 ten Bangladeshi adults aged  $\geq 18$  years have hyperglycemia. Bangladeshi adults with  
39  
40 462 hypertension and abdominal obesity are high-risk groups for the development of diabetes and  
41  
42 463 should be targeted for routine screening for diabetes. Preventive methods such as lifestyle  
43  
44 464 changes and medication should be recommended by primary care providers in Bangladesh to  
45  
46 465 avoid the future development of CVDs among this group. In order to control the prevalence of  
47  
48 466 hyperglycemia in the diabetic range, and reduce the burden of diabetes or associated risk  
49  
50 467 factors, national initiatives such as training community health workers to deliver primary care  
51  
52 468 and implementing universal health coverage should be implemented to curb the spread of  
53  
54 469 NCDs in Bangladesh.  
55  
56  
57  
58  
59  
60

1  
2  
3 470  
4  
5 471  
6  
7 472  
8  
9 473  
10  
11 474  
12  
13 475  
14  
15 476  
16  
17 477  
18  
19 478  
20  
21 479  
22  
23 480  
24  
25 481  
26  
27 482  
28  
29 483  
30  
31 484  
32  
33 485  
34  
35 486  
36  
37 487  
38  
39 488  
40  
41 489  
42  
43 490  
44  
45 491  
46  
47 492  
48  
49 493  
50  
51 494  
52  
53 495  
54  
55  
56  
57  
58  
59  
60

For peer review only

1  
2  
3 496 Figures  
4

5 497 Figure 1: Urban and Rural differences in the distribution of blood glucose levels based on  
6  
7 498 random capillary blood measurement among (A) All Participants, and (B) Men and Women (n =  
8  
9 499 1819)  
10

11 500 Figure 2: Prevalence of hyperglycemia among Bangladeshi adults aged 18 years and above by  
12  
13 501 sex and age group, 2015 (n = 1819)  
14

15 502 Figure 3: Bangladeshi adults aged 18 years and above with (A) self-reported diabetes and (B)  
16  
17 503 self-reported diabetics on diabetes medications, 2015  
18  
19

20 504 Figure 4: Self-reported diabetics aged 18 years or older who take diabetes medication with  
21  
22 505 hyperglycemia on study measurement ( $\geq 11.0$ mmol/L)  
23

24 506

25  
26 507

27  
28 508

29  
30 509

31  
32 510

33  
34 511

35  
36 512

37  
38 513

39  
40 514

41  
42 515

43  
44 516

45  
46 517

47  
48 518

49  
50 519

51  
52 520

53  
54 521  
55  
56  
57  
58  
59  
60

1  
2  
3 **522 Abbreviations**  
4

5 523 WHO: World Health Organization  
6

7 524 ADA: American Diabetes Association  
8

9 525 aPR: Adjusted prevalence ratio  
10

11 526 BBS: Bangladesh Bureau of Statistics  
12

13 527 BMI: Body mass index  
14

15 528 BP: Blood pressure  
16

17 529 BSMMU: Bangabandhu Sheikh Mujib Medical University  
18

19 530 CI: Confidence interval  
20

21 531 CVD: Cardiovascular disease  
22

23 532 MET: Metabolic equivalent  
24

25 533 mmHg: Millimeter of mercury  
26

27 534 mmol/L: Millimoles per liter  
28

29 535 NCD: Non-communicable disease  
30

31 536 SBP: Systolic blood pressure  
32

33 537 DBP: Diastolic blood pressure  
34

35 538 PSU: Primary sampling unit  
36

37 539 SD: Standard deviation  
38

39 540 STEPS: STEPwise approach to Surveillance  
40

41 541  
42

43 542  
44

45 543  
46

47 544  
48

49 545  
50

51 546  
52

53 547  
54  
55  
56  
57  
58  
59  
60

1  
2  
3 548 **Footnotes**  
4

5 549 Ethics approval and consent to participate: Ethical guidelines as outlined by the Declaration of  
6  
7 550 Helsinki were followed throughout the study. Ethical clearance was obtained from the  
8  
9 551 Institutional Review Board of Bangabandhu Sheikh Mujib Medical University (BSMMU) (Protocol  
10  
11 552 Number: 1100). We obtained permission from the relevant administrative units of the surveyed  
12  
13 553 districts. Orientations with community leaders (elected representatives of the local government  
14  
15 554 offices) were conducted prior to data collection for community engagement in the study's  
16  
17 555 implementation process. Written (or thumb impression if unable to write) consent was obtained  
18  
19 556 from the respondents in Bangla as per BSMMU Institutional Review Board (IRB) guidelines.  
20

21  
22 557 Availability of data and materials: The de-identified participant data used and/or analyzed during  
23  
24 558 the current study are available from the corresponding author on reasonable request. Please  
25  
26 559 contact M. Mostafa Zaman at zamanm@who.int for further information and guidelines.  
27

28 560 Competing Interests: The authors declare no competing interests. The authors alone are  
29  
30 561 responsible for views expressed in this article and they do not necessarily represent the views,  
31  
32 562 decisions or policies of the institutions with which they are affiliated.  
33

34 563 Funding: The study was conducted with the technical and financial assistance of the World  
35  
36 564 Health Organization Country Office for Bangladesh.  
37

38  
39 565 Authors contributions: JYI: conceptualized the manuscript, analyzed data, interpreted results  
40  
41 566 critically, and drafted the manuscript. MMZ: designed the study, interpreted results critically,  
42  
43 567 guided manuscript writing, and critically reviewed it. MRB, SAH, SA, ZAQ: trained the field team,  
44  
45 568 implemented the survey, processed and analyzed data, and reviewed the manuscript.  
46

47 569 Acknowledgments: The authors thank Mr. Hassanuzzaman Khan for his efforts on data  
48  
49 570 management.  
50

51 571

52 572

53 573

574 **References**

- 575 1. Disease GBD, Injury I, Prevalence C. Global, regional, and national incidence, prevalence,  
576 and years lived with disability for 354 diseases and injuries for 195 countries and  
577 territories, 1990-2017: a systematic analysis for the Global Burden of Disease Study  
578 2017. *Lancet (London, England)* 2018;392(10159):1789-858. doi: 10.1016/S0140-  
579 6736(18)32279-7
- 580 2. Ogurtsova K, da Rocha Fernandes JD, Huang Y, et al. IDF Diabetes Atlas: Global estimates  
581 for the prevalence of diabetes for 2015 and 2040. *Diabetes research and clinical practice*  
582 2017;128:40-50. doi: 10.1016/j.diabres.2017.03.024
- 583 3. Global report on diabetes. Geneva, Switzerland: World Health Organization 2016.
- 584 4. Jayawardena R, Ranasinghe P, Byrne NM, et al. Prevalence and trends of the diabetes  
585 epidemic in South Asia: a systematic review and meta-analysis. *BMC public health*  
586 2012;12:380. doi: 10.1186/1471-2458-12-380
- 587 5. IDF diabetes atlas sixth edition Brussels, Belgium International Diabetes Federation, 2013.
- 588 6. Saquib N, Saquib J, Ahmed T, et al. Cardiovascular diseases and type 2 diabetes in  
589 Bangladesh: a systematic review and meta-analysis of studies between 1995 and 2010.  
590 *BMC public health* 2012;12:434. doi: 10.1186/1471-2458-12-434
- 591 7. Biswas T, Islam A, Rawal LB, et al. Increasing prevalence of diabetes in Bangladesh: a  
592 scoping review. *Public health* 2016;138:4-11. doi: 10.1016/j.puhe.2016.03.025
- 593 8. Rahman MS, Akter S, Abe SK, et al. Awareness, treatment, and control of diabetes in  
594 Bangladesh: a nationwide population-based study. *PloS one* 2015;10(2):e0118365. doi:  
595 10.1371/journal.pone.0118365
- 596 9. Akter S, Rahman MM, Abe SK, et al. Prevalence of diabetes and prediabetes and their risk  
597 factors among Bangladeshi adults: a nationwide survey. *Bulletin of the World Health*  
598 *Organization* 2014;92(3):204-13, 13A. doi: 10.2471/BLT.13.128371



- 1  
2  
3 599 10. Zaman MM, Choudhury SR, Ahmed J, et al. Blood glucose and cholesterol levels in adult  
4  
5 600 population of Bangladesh: Results from STEPS 2006 survey. *Indian heart journal*  
6  
7 601 2016;68(1):52-6. doi: 10.1016/j.ihj.2015.06.031  
8  
9 602 11. NCD Global Monitoring Framework: World Health Organization; 2017 [Available from:  
10  
11 603 [http://www.who.int/nmh/global\\_monitoring\\_framework/en/](http://www.who.int/nmh/global_monitoring_framework/en/) accessed 09/29 2017.  
12  
13 604 12. Global action plan for the prevention and control of noncommunicable diseases 2013-2020.  
14  
15 605 Geneva, Switzerland: World Health Organization, 2013.  
16  
17 606 13. Siddique MKB, Islam SMS, Banik PC, et al. Diabetes knowledge and utilization of  
18  
19 607 healthcare services among patients with type 2 diabetes mellitus in Dhaka, Bangladesh.  
20  
21 608 *BMC health services research* 2017;17(1):586. doi: 10.1186/s12913-017-2542-3  
22  
23 609 14. Shariful Islam SM, Lechner A, Ferrari U, et al. Healthcare use and expenditure for diabetes  
24  
25 610 in Bangladesh. *BMJ Glob Health* 2017;2(1):e000033. doi: 10.1136/bmjgh-2016-000033  
26  
27 611 15. Haghparast-Bidgoli H, Shaha SK, Kuddus A, et al. Protocol of economic evaluation and  
28  
29 612 equity impact analysis of mHealth and community groups for prevention and control of  
30  
31 613 diabetes in rural Bangladesh in a three-arm cluster randomised controlled trial. *BMJ*  
32  
33 614 *open* 2018;8(8):e022035. doi: 10.1136/bmjopen-2018-022035  
34  
35 615 16. Islam JY, Zaman MM, Haq SA, et al. Epidemiology of hypertension among Bangladeshi  
36  
37 616 adults using the 2017 ACC/AHA Hypertension Clinical Practice Guidelines and Joint  
38  
39 617 National Committee 7 Guidelines. *Journal of human hypertension* 2018;32(10):668-80.  
40  
41 618 doi: 10.1038/s41371-018-0087-5  
42  
43 619 17. Chronic Disease and Health Promotion: STEP wise approach to surveillance (STEPS).  
44  
45 620 Geneva: World Health Organization.  
46  
47 621 18. Population and Housing Census 2001, updated in 2009. Dhaka, Bangladesh: Bangladesh  
48  
49 622 Bureau of Statistics 2009.  
50  
51  
52  
53  
54  
55  
56  
57  
58  
59  
60

- 1  
2  
3 623 19. Goycochea-Robles MV, Sanin LH, Moreno-Montoya J, et al. Validity of the COPCORD core  
4  
5 624 questionnaire as a classification tool for rheumatic diseases. *J Rheumatol Suppl*  
6  
7 625 2011;86:31-5. doi: 10.3899/jrheum.100955  
8  
9 626 20. Guidelines for Care of Type 2 Diabetes Mellitus in Bangladesh. Dhaka, Bangladesh:  
10  
11 627 BIRDEM Clinical Research Group, 2003.  
12  
13 628 21. American Diabetes A. 2. Classification and Diagnosis of Diabetes. *Diabetes care*  
14  
15 629 2017;40(Suppl 1):S11-S24. doi: 10.2337/dc17-S005  
16  
17 630 22. Moniruzzaman M, Mostafa Zaman M, Islam MS, et al. Physical activity levels in Bangladeshi  
18  
19 631 adults: results from STEPS survey 2010. *Public health* 2016;137:131-8. doi:  
20  
21 632 10.1016/j.puhe.2016.02.028  
22  
23 633 23. A global brief on Hypertension: Silent Killer, global public health crisis. Geneva, Switzerland:  
24  
25 634 World Health Organization, 2013.  
26  
27 635 24. Ahmad OB, Boschi-Pinto C, Lopez AD, et al. Age Standardization of Rates: A New WHO  
28  
29 636 Standard. GPE Discussion Paper Series: No31 Geneva, Switzerland: World Health  
30  
31 637 Organization, 2001.  
32  
33 638 25. World (WHO 2000-2025) Standard Rockville, MD: National Cancer Institute: Surveillance,  
34  
35 639 Epidemiology, and End Results Program; 2017 [Available from:  
36  
37 640 <https://seer.cancer.gov/stdpopulations/world.who.html> accessed December 17 2017.  
38  
39 641 26. Coutinho LM, Scazufca M, Menezes PR. Methods for estimating prevalence ratios in cross-  
40  
41 642 sectional studies. *Revista de saude publica* 2008;42(6):992-8.  
42  
43 643 27. Behrens T, Taeger D, Wellmann J, et al. Different methods to calculate effect estimates in  
44  
45 644 cross-sectional studies. A comparison between prevalence odds ratio and prevalence  
46  
47 645 ratio. *Methods Inf Med* 2004;43(5):505-9.  
48  
49 646 28. Barros AJ, Hirakata VN. Alternatives for logistic regression in cross-sectional studies: an  
50  
51 647 empirical comparison of models that directly estimate the prevalence ratio. *BMC medical*  
52  
53 648 *research methodology* 2003;3:21. doi: 10.1186/1471-2288-3-21  
54  
55  
56  
57  
58  
59  
60

- 1  
2  
3 649 29. Singh PN, Arthur KN, Orlich MJ, et al. Global epidemiology of obesity, vegetarian dietary  
4  
5 650 patterns, and noncommunicable disease in Asian Indians. *The American journal of*  
6  
7 651 *clinical nutrition* 2014;100 Suppl 1:359S-64S. doi: 10.3945/ajcn.113.071571  
8  
9 652 30. Hills AP, Arena R, Khunti K, et al. Epidemiology and determinants of type 2 diabetes in  
10  
11 653 south Asia. *Lancet Diabetes Endocrinol* 2018;6(12):966-78. doi: 10.1016/S2213-  
12  
13 654 8587(18)30204-3  
14  
15 655 31. Chan JC, Malik V, Jia W, et al. Diabetes in Asia: epidemiology, risk factors, and  
16  
17 656 pathophysiology. *Jama* 2009;301(20):2129-40. doi: 10.1001/jama.2009.726  
18  
19 657 32. Alam DS, Talukder SH, Chowdhury MA, et al. Overweight and abdominal obesity as  
20  
21 658 determinants of undiagnosed diabetes and pre-diabetes in Bangladesh. *BMC Obes*  
22  
23 659 2016;3:19. doi: 10.1186/s40608-016-0099-z  
24  
25 660 33. Tareque MI, Koshio A, Tiedt AD, et al. Are the rates of hypertension and diabetes higher in  
26  
27 661 people from lower socioeconomic status in Bangladesh? Results from a nationally  
28  
29 662 representative survey. *PloS one* 2015;10(5):e0127954. doi:  
30  
31 663 10.1371/journal.pone.0127954  
32  
33 664 34. Biswas T, Islam MS, Linton N, et al. Socio-Economic Inequality of Chronic Non-  
34  
35 665 Communicable Diseases in Bangladesh. *PloS one* 2016;11(11):e0167140. doi:  
36  
37 666 10.1371/journal.pone.0167140  
38  
39 667 35. Gaziano TA, Abrahams-Gessel S, Denman CA, et al. An assessment of community health  
40  
41 668 workers' ability to screen for cardiovascular disease risk with a simple, non-invasive risk  
42  
43 669 assessment instrument in Bangladesh, Guatemala, Mexico, and South Africa: an  
44  
45 670 observational study. *The Lancet Global health* 2015;3(9):e556-63. doi: 10.1016/S2214-  
46  
47 671 109X(15)00143-6  
48  
49  
50  
51  
52  
53  
54  
55  
56  
57  
58  
59  
60

**Table 1: Background Characteristics of Bangladeshi adult participants, 2015 (n = 1819)**

| Characteristic                       | Total (n = 1819) |      |      | Urban (n = 708) |     |      | Rural (n = 1111) |     |      |
|--------------------------------------|------------------|------|------|-----------------|-----|------|------------------|-----|------|
|                                      | Mean (SD)        | n    | %    | Mean (SD)       | n   | %    | Mean (SD)        | n   | %    |
| Sex                                  |                  |      |      |                 |     |      |                  |     |      |
| Male                                 |                  | 892  | 49.0 |                 | 345 | 48.7 |                  | 547 | 49.2 |
| Female                               |                  | 927  | 50.9 |                 | 363 | 51.3 |                  | 564 | 50.8 |
| Age(years)                           | 40.5 (14.7)      |      |      | 39.1 (13.9)     |     |      | 41.4 (15.1)      |     |      |
| Education (Years) <sup>a</sup>       | 5 (0 - 9)        |      |      | 8 (3-12)        |     |      | 4 (0-8)          |     |      |
| Marital Status                       |                  |      |      |                 |     |      |                  |     |      |
| Never Married                        |                  | 110  | 6.1  |                 | 54  | 7.6  |                  | 56  | 4.9  |
| Married                              |                  | 1601 | 88.0 |                 | 619 | 87.4 |                  | 982 | 88.4 |
| Separated/Divorced/Widowed           |                  | 108  | 5.9  |                 | 35  | 4.9  |                  | 73  | 6.5  |
| Occupation                           |                  |      |      |                 |     |      |                  |     |      |
| Professional employment <sup>b</sup> |                  | 279  | 15.2 |                 | 189 | 26.7 |                  | 90  | 8.1  |
| Unemployed/retired                   |                  | 98   | 5.3  |                 | 43  | 6.1  |                  | 55  | 4.9  |
| Industrial worker/Day Laborer        |                  | 483  | 26.6 |                 | 120 | 16.9 |                  | 363 | 32.7 |
| Housewife                            |                  | 726  | 39.9 |                 | 247 | 34.9 |                  | 479 | 43.2 |
| Other <sup>c</sup>                   |                  | 232  | 12.8 |                 | 109 | 15.4 |                  | 123 | 11.1 |
| Wealth Index <sup>d</sup>            |                  |      |      |                 |     |      |                  |     |      |
| 1st Wealth Quartile                  |                  | 407  | 22.4 |                 | 110 | 15.5 |                  | 297 | 26.7 |
| 2nd Wealth Quartile                  |                  | 533  | 29.3 |                 | 171 | 24.2 |                  | 362 | 32.6 |
| 3rd Wealth Quartile                  |                  | 429  | 23.6 |                 | 179 | 25.3 |                  | 250 | 22.5 |
| 4th Wealth Quartile                  |                  | 450  | 24.7 |                 | 248 | 35.0 |                  | 202 | 18.2 |
| Tobacco Use <sup>e</sup>             |                  |      |      |                 |     |      |                  |     |      |
| Never                                |                  | 859  | 47.2 |                 | 389 | 54.9 |                  | 470 | 42.3 |
| Current Use                          |                  | 821  | 45.1 |                 | 268 | 37.9 |                  | 553 | 49.8 |
| Past Use                             |                  | 139  | 7.6  |                 | 51  | 7.2  |                  | 88  | 7.9  |
| Smoking Tobacco Use <sup>f</sup>     |                  |      |      |                 |     |      |                  |     |      |
| Every day / Occasionally             |                  | 494  | 27.2 |                 | 169 | 23.9 |                  | 325 | 29.3 |
| Past Use                             |                  | 104  | 5.7  |                 | 38  | 5.4  |                  | 66  | 5.9  |
| Never                                |                  | 1221 | 67.1 |                 | 501 | 70.8 |                  | 720 | 64.8 |
| Smokeless Tobacco Use <sup>g</sup>   |                  |      |      |                 |     |      |                  |     |      |
| Every day / Occasionally             |                  | 529  | 29.1 |                 | 150 | 21.2 |                  | 379 | 34.1 |
| Past Use                             |                  | 51   | 2.8  |                 | 21  | 2.9  |                  | 30  | 2.7  |
| Never                                |                  | 1239 | 68.1 |                 | 537 | 75.9 |                  | 702 | 63.2 |
| Physical Activity <sup>h</sup>       |                  |      |      |                 |     |      |                  |     |      |
| Vigorous                             |                  | 1268 | 69.7 |                 | 445 | 62.9 |                  | 823 | 74.1 |
| Moderate                             |                  | 464  | 25.5 |                 | 234 | 33.1 |                  | 230 | 20.7 |
| Low                                  |                  | 87   | 4.7  |                 | 29  | 4.1  |                  | 58  | 5.2  |

|   |                                                        |              |              |              |      |    |      |
|---|--------------------------------------------------------|--------------|--------------|--------------|------|----|------|
| 1 | Body Mass Index <sup>i</sup>                           | 22.1 (4.1)   | 23.3 (4.5)   | 21.3 (3.7)   |      |    |      |
| 2 | Waist Circumference (cm)                               | 78.4 (11.6)  | 81.8 (12.6)  | 76.2 (10.3)  |      |    |      |
| 3 | Blood Pressure                                         |              |              |              |      |    |      |
| 4 | Systolic Blood Pressure (mmHg)                         | 116.1 (17.1) | 117.9 (16.6) | 115.0 (17.3) |      |    |      |
| 5 | Diastolic Blood Pressure (mmHg)                        | 76.1 (10.5)  | 77.9 (10.9)  | 74.9 (10.1)  |      |    |      |
| 6 | Blood Glucose Level (mmol/l)                           | 6.4 (2.4)    | 6.6 (2.9)    | 6.3 (2.1)    |      |    |      |
| 7 | Self-reported diabetes medication history <sup>j</sup> | 69           | 72.6         | 50           | 80.6 | 19 | 57.6 |

9 Abbreviations: SD, standard deviation

10 <sup>a</sup> Calculated median and interquartile range for education as the data are skewed

11 <sup>b</sup> Professional occupation includes: Field staff, police officer, guard, doctor, engineer, professional, business man, desk job

12 <sup>c</sup> Other occupation includes: Shop keeper, weavers, driver, student, beggar, cook, carpenter, tailor, migrant workers and fishermen

13 <sup>d</sup> Wealth index was calculated using principal component analysis using data collected on household ownership of the following items: electricity, flushable toilet, land phone, cell phone, television, radio, refrigerator, private car, motor cycle, washing machine, bicycle, sewing machine, almirah/wardrobe, table, bed, chair/bench, watch/clock, as well as, type of main material used to build their homes roof, walls and floor

14 <sup>e</sup> Includes both smokeless tobacco and smoke tobacco

15 <sup>f</sup> Smoking tobacco use includes cigarettes, biri, hookah, etc.

16 <sup>g</sup> Smokeless tobacco use includes jarda, sada pata, pan mashala with tobacco leaf, gul etc.

17 <sup>h</sup> Measured in MET-minutes; 1 MET stands for the amount of oxygen you consume and the number of calories you burn at rest.

18 <sup>i</sup> Body mass index (BMI) calculated by weight in kilogram divided by height in meter squared

19 <sup>j</sup> Percentage reported out of participants who self-reported to have diabetes (Total n = 95; Urban n = 62; Rural n = 33)

**Table 2: Determinants of hyperglycemia among Bangladeshi adults, 2015 (n = 1819)**

| Characteristic                  | Total (n = 1819)                   |                                   | Urban (n = 708)                    |                                   | Rural (n = 1111)                   |                                   |
|---------------------------------|------------------------------------|-----------------------------------|------------------------------------|-----------------------------------|------------------------------------|-----------------------------------|
|                                 | Diabetes <sup>a</sup> Prevalence % | Adjusted PR <sup>b</sup> (95% CI) | Diabetes <sup>a</sup> Prevalence % | Adjusted PR <sup>b</sup> (95% CI) | Diabetes <sup>a</sup> Prevalence % | Adjusted PR <sup>b</sup> (95% CI) |
| <b>Area</b>                     |                                    |                                   |                                    |                                   |                                    |                                   |
| Urban                           | 9.8                                | Ref.                              | -                                  | -                                 | -                                  | -                                 |
| Rural                           | 2.8                                | 0.44 (0.28 – 0.68)                | -                                  | -                                 | -                                  | -                                 |
| <b>Sex</b>                      |                                    |                                   |                                    |                                   |                                    |                                   |
| Male                            | 4.9                                | Ref.                              | 7.5                                | Ref.                              | 3.3                                | Ref.                              |
| Female                          | 5.9                                | 1.05 (0.71 – 1.54)                | 11.9                               | 1.26 (0.80 – 1.99)                | 2.2                                | 0.61 (0.29 – 1.28)                |
| <b>Age (years)</b>              |                                    |                                   |                                    |                                   |                                    |                                   |
| 18 - 29                         | 2.5                                | Ref.                              | 2.5                                | Ref.                              | 2.5                                | Ref.                              |
| 30 - 44                         | 4.9                                | 1.48 (0.78 – 2.79)                | 8.4                                | 2.55 (1.01 – 6.41)                | 2.5                                | 0.76 (0.30 – 1.93)                |
| 45 - 54                         | 7.4                                | 2.18 (1.10 – 4.31)                | 15.5                               | 4.38 (1.62 – 11.59)               | 2.8                                | 0.67 (0.25 – 1.83)                |
| ≥ 55                            | 8.8                                | 1.92 (0.95 – 3.86)                | 19.3                               | 3.92 (1.48 – 10.39)               | 3.4                                | 0.53 (0.17 – 1.67)                |
| <b>Educational Status</b>       |                                    |                                   |                                    |                                   |                                    |                                   |
| No Education                    | 3.4                                | Ref.                              | 7.0                                | Ref.                              | 2.1                                | Ref.                              |
| Primary Education               | 3.7                                | 1.00 (0.53 – 1.86)                | 7.6                                | 1.00 (0.44 – 2.30)                | 2.1                                | 0.84 (0.30 – 2.30)                |
| Secondary Education             | 6.9                                | 1.67 (0.95 – 2.93)                | 12.1                               | 1.94 (0.95 – 3.97)                | 2.9                                | 1.01 (0.40 – 2.54)                |
| Above Secondary Education       | 9.8                                | 1.48 (0.77 – 2.84)                | 10.4                               | 1.54 (0.71 – 3.33)                | 8.1                                | 2.24 (0.68 – 7.41)                |
| <b>Wealth Index<sup>c</sup></b> |                                    |                                   |                                    |                                   |                                    |                                   |
| 1st Wealth Quartile             | 7.7                                | 2.58 (1.57 – 4.24)                | 18.9                               | 3.18 (1.80 – 5.62)                | 3.6                                | 1.37 (0.53 – 3.49)                |
| 2nd Wealth Quartile             | 4.3                                | 1.23 (0.71 – 2.14)                | 9.4                                | 1.50 (0.82 – 2.77)                | 1.9                                | 0.70 (0.24 – 2.05)                |
| 3rd Wealth Quartile             | 3.7                                | 0.86 (0.47 – 1.58)                | 6.0                                | 0.96 (0.48 – 1.92)                | 2.0                                | 0.55 (0.18 – 1.73)                |
| 4th Wealth Quartile             | 6.6                                | Ref.                              | 8.8                                | Ref.                              | 3.9                                | Ref.                              |
| <b>Blood Pressure</b>           |                                    |                                   |                                    |                                   |                                    |                                   |
| Normal Blood Pressure           | 1.9                                | Ref.                              | 3.5                                | Ref.                              | 1.1                                | Ref.                              |
| Pre-Hypertension <sup>d</sup>   | 5.7                                | 1.74 (1.00 – 3.01)                | 8.3                                | 1.37 (0.69 – 2.74)                | 3.8                                | 2.32(0.91 – 5.92)                 |
| Hypertension <sup>e</sup>       | 18.9                               | 3.57 (2.01 – 6.34)                | 27.4                               | 2.65 (1.30 – 5.38)                | 8.8                                | 5.39(1.94 – 14.96)                |
| <b>Physical Activity</b>        |                                    |                                   |                                    |                                   |                                    |                                   |
| Vigorous                        | 3.9                                | Ref.                              | 6.9                                | Ref.                              | 2.3                                | Ref.                              |
| Moderate                        | 8.2                                | 1.18 (0.78 – 1.77)                | 13.8                               | 1.22 (0.77 – 1.93)                | 2.1                                | 0.65 (0.22 – 1.88)                |
| Low                             | 14.9                               | 3.04 (1.69 – 5.47)                | 20.7                               | 3.01 (1.42 – 6.38)                | 12.1                               | 2.58 (0.95 – 7.04)                |

|   |                                |      |                    |      |                    |     |                    |
|---|--------------------------------|------|--------------------|------|--------------------|-----|--------------------|
| 1 |                                |      |                    |      |                    |     |                    |
| 2 | Body Mass Index <sup>f</sup>   |      |                    |      |                    |     |                    |
| 3 | Underweight (<18.5)            | 1.1  | 0.37 (0.12 – 1.13) | 1.8  | 0.38 (0.07 – 1.95) | 0.7 | 0.42 (0.09 – 2.02) |
| 4 | Normal (18.5 - 25)             | 4.7  | Ref.               | 8.2  | Ref.               | 2.8 | Ref.               |
| 5 | Overweight (25.1 - 30)         | 10.4 | 1.06 (0.68 – 1.65) | 14.0 | 1.05 (0.61 – 1.80) | 6.2 | 1.22 (0.51 – 2.91) |
| 6 | Obese (>30)                    | 20.9 | 1.49 (0.87 – 2.57) | 26.5 | 1.46 (0.81 – 2.64) | 5.6 | 0.95 (0.12 – 7.60) |
| 7 | Waist Circumference (cm)       |      |                    |      |                    |     |                    |
| 8 | Normal <sup>g</sup>            | 2.3  | Ref.               | 3.8  | Ref.               | 1.6 | Ref.               |
| 9 | Abdominally Obese <sup>h</sup> | 13.3 | 2.49 (1.53 – 4.07) | 18.1 | 2.54 (1.35 – 4.77) | 6.8 | 2.95 (1.32 – 6.58) |

Abbreviations: PR = prevalence ratio, CI = confidence intervals, Ref = referent category

<sup>a</sup> Hyperglycemia was defined as a capillary blood glucose level greater than or equal to 11.1 mmol/L or self-reported diabetes medication use

<sup>b</sup> Model adjusted for all variables included in table: sex, age, education, wealth index, blood pressure, body mass index, self-reported physical activity, and waist circumference

<sup>c</sup> Wealth index was calculated using principal component analysis using data collected on household ownership of the following items: electricity, flushable toilet, land phone, cell phone, television, radio, refrigerator, private car, motor cycle, washing machine, bicycle, sewing machine, almirah/wardrobe, table, bed, chair/bench, watch/clock, as well as, type of main material used to build their homes roof, walls and floor

<sup>d</sup> Pre-Hypertension was defined as SBP  $\geq$ 120 mmHg but < 140 mmHg and/or DBP  $\geq$  80 mmHg but <90 mmHg and not taking anti-hypertensive medication at the time of the survey

<sup>e</sup> Hypertension was defined as systolic blood pressure (SBP) was  $\geq$ 140 mmHg (millimeters of mercury) and/or, diastolic blood pressure (DBP)  $\geq$ 90 mmHg and/or taking any-hypertensive medication

<sup>f</sup> Body mass index (BMI) calculated by weight in kilogram divided by height in meter squared

<sup>g</sup> Defined as <90 cm M; <80 cm F

<sup>h</sup> Defined as  $\geq$ 90 cm M;  $\geq$ 80 cm F

1  
2  
3  
4  
5  
6  
7  
8  
9  
10  
11  
12  
13  
14  
15  
16  
17  
18  
19  
20  
21  
22  
23  
24  
25  
26  
27  
28  
29  
30  
31  
32  
33  
34  
35  
36  
37  
38  
39  
40  
41  
42  
43  
44  
45  
46  
47  
48  
49  
50  
51  
52  
53  
54  
55  
56  
57  
58  
59  
60

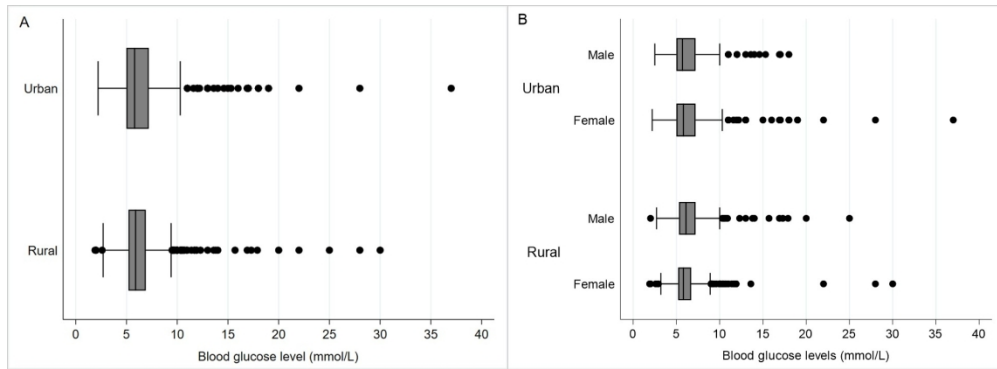

Figure 1: Urban and Rural differences in the distribution of blood glucose levels based on random capillary blood measurement among (A) All Participants, and (B) Men and Women (n = 1819)

327x119mm (150 x 150 DPI)



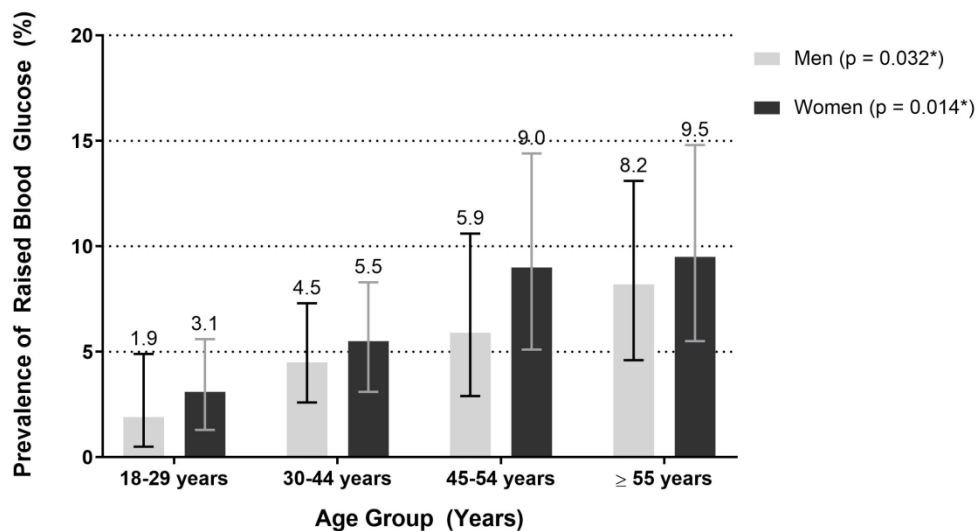

\*Exact test p-value to assess the relationship between prevalence of raised blood glucose and age group stratified by sex

Figure 2: Prevalence of hyperglycemia among Bangladeshi adults aged 18 years and above by sex and age group, 2015 (n = 1819)

211x137mm (300 x 300 DPI)

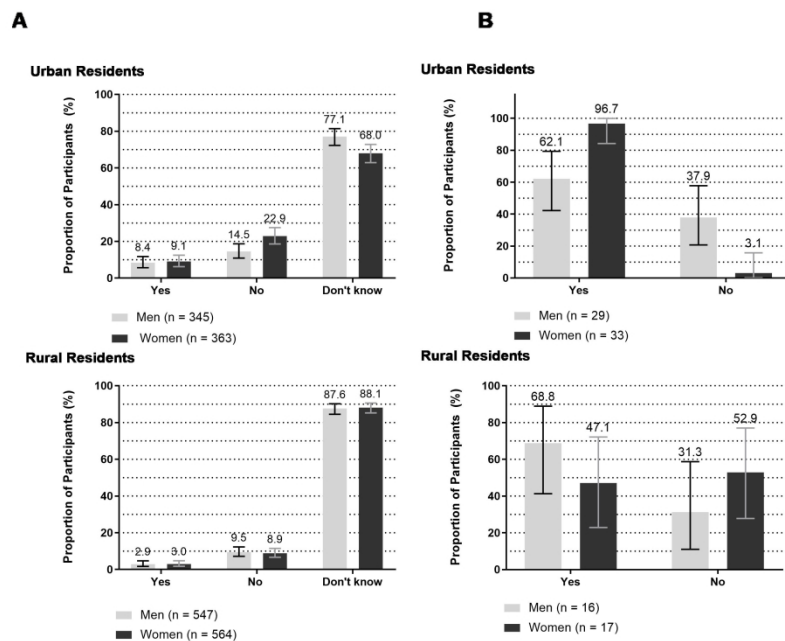

Figure 3: Bangladeshi adults aged 18 years and above with (A) self-reported diabetes and (B) self-reported diabetics on diabetes medications, 2015

284x190mm (300 x 300 DPI)

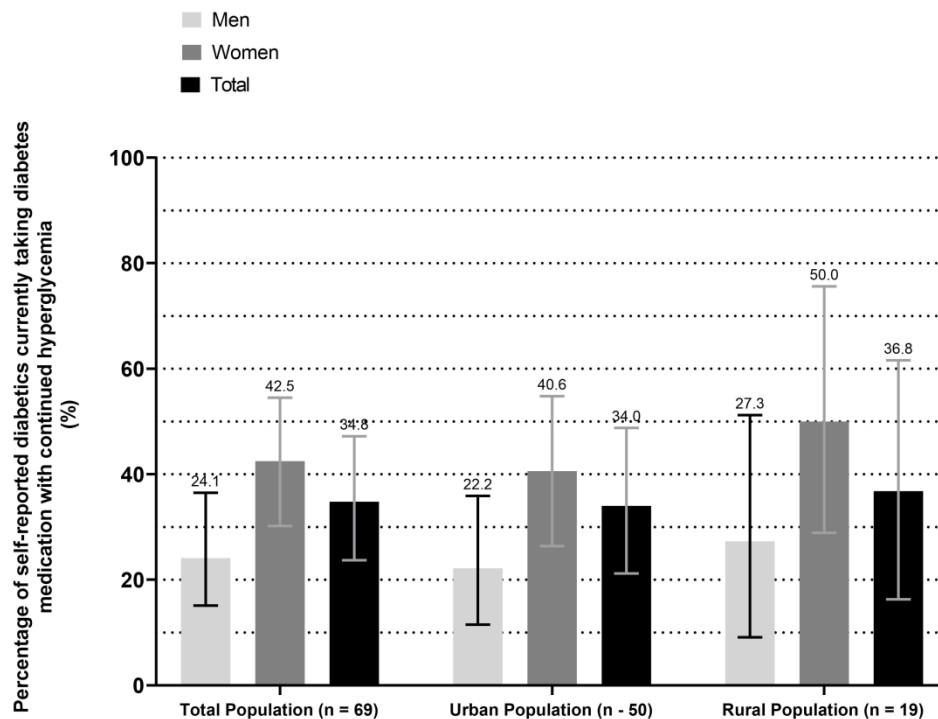

Figure 4: Self-reported diabetics aged 18 years or older who take diabetes medication with hyperglycemia on study measurement ( $\geq 11.0\text{mmol/L}$ )

284x210mm (300 x 300 DPI)

**STROBE 2007 (v4) Statement—Checklist of items that should be included in reports of *cross-sectional studies***

| Section/Topic                | Item # | Recommendation                                                                                                                                                                       | Reported on page # |
|------------------------------|--------|--------------------------------------------------------------------------------------------------------------------------------------------------------------------------------------|--------------------|
| <b>Title and abstract</b>    | 1      | (a) Indicate the study’s design with a commonly used term in the title or the abstract                                                                                               | 2                  |
|                              |        | (b) Provide in the abstract an informative and balanced summary of what was done and what was found                                                                                  | 2-3                |
| <b>Introduction</b>          |        |                                                                                                                                                                                      |                    |
| Background/rationale         | 2      | Explain the scientific background and rationale for the investigation being reported                                                                                                 | 5-6                |
| Objectives                   | 3      | State specific objectives, including any prespecified hypotheses                                                                                                                     | 6                  |
| <b>Methods</b>               |        |                                                                                                                                                                                      |                    |
| Study design                 | 4      | Present key elements of study design early in the paper                                                                                                                              | 6                  |
| Setting                      | 5      | Describe the setting, locations, and relevant dates, including periods of recruitment, exposure, follow-up, and data collection                                                      | 7                  |
| Participants                 | 6      | (a) Give the eligibility criteria, and the sources and methods of selection of participants                                                                                          | 6                  |
| Variables                    | 7      | Clearly define all outcomes, exposures, predictors, potential confounders, and effect modifiers. Give diagnostic criteria, if applicable                                             | 8-9                |
| Data sources/<br>measurement | 8*     | For each variable of interest, give sources of data and details of methods of assessment (measurement). Describe comparability of assessment methods if there is more than one group | 7-10               |
| Bias                         | 9      | Describe any efforts to address potential sources of bias                                                                                                                            | 6-7 & 11           |
| Study size                   | 10     | Explain how the study size was arrived at                                                                                                                                            | 7                  |
| Quantitative variables       | 11     | Explain how quantitative variables were handled in the analyses. If applicable, describe which groupings were chosen and why                                                         | 9-10               |
| Statistical methods          | 12     | (a) Describe all statistical methods, including those used to control for confounding                                                                                                | 11                 |
|                              |        | (b) Describe any methods used to examine subgroups and interactions                                                                                                                  | 11                 |
|                              |        | (c) Explain how missing data were addressed                                                                                                                                          | N/A                |
|                              |        | (d) If applicable, describe analytical methods taking account of sampling strategy                                                                                                   | N/A                |
|                              |        | (e) Describe any sensitivity analyses                                                                                                                                                | N/A                |
| <b>Results</b>               |        |                                                                                                                                                                                      |                    |

|                          |     |                                                                                                                                                                                                              |       |
|--------------------------|-----|--------------------------------------------------------------------------------------------------------------------------------------------------------------------------------------------------------------|-------|
| Participants             | 13* | (a) Report numbers of individuals at each stage of study—eg numbers potentially eligible, examined for eligibility, confirmed eligible, included in the study, completing follow-up, and analysed            | 7     |
|                          |     | (b) Give reasons for non-participation at each stage                                                                                                                                                         | 7     |
|                          |     | (c) Consider use of a flow diagram                                                                                                                                                                           | N/A   |
| Descriptive data         | 14* | (a) Give characteristics of study participants (eg demographic, clinical, social) and information on exposures and potential confounders                                                                     | 12    |
|                          |     | (b) Indicate number of participants with missing data for each variable of interest                                                                                                                          | N/A   |
| Outcome data             | 15* | Report numbers of outcome events or summary measures                                                                                                                                                         |       |
| Main results             | 16  | (a) Give unadjusted estimates and, if applicable, confounder-adjusted estimates and their precision (eg, 95% confidence interval). Make clear which confounders were adjusted for and why they were included | 12    |
|                          |     | (b) Report category boundaries when continuous variables were categorized                                                                                                                                    | 9     |
|                          |     | (c) If relevant, consider translating estimates of relative risk into absolute risk for a meaningful time period                                                                                             | N/A   |
| Other analyses           | 17  | Report other analyses done—eg analyses of subgroups and interactions, and sensitivity analyses                                                                                                               | 11    |
| <b>Discussion</b>        |     |                                                                                                                                                                                                              |       |
| Key results              | 18  | Summarise key results with reference to study objectives                                                                                                                                                     | 12-14 |
| Limitations              | 19  | Discuss limitations of the study, taking into account sources of potential bias or imprecision. Discuss both direction and magnitude of any potential bias                                                   | 17-18 |
| Interpretation           | 20  | Give a cautious overall interpretation of results considering objectives, limitations, multiplicity of analyses, results from similar studies, and other relevant evidence                                   | 15-18 |
| Generalisability         | 21  | Discuss the generalisability (external validity) of the study results                                                                                                                                        | 17    |
| <b>Other information</b> |     |                                                                                                                                                                                                              |       |
| Funding                  | 22  | Give the source of funding and the role of the funders for the present study and, if applicable, for the original study on which the present article is based                                                | 20    |

\*Give information separately for cases and controls in case-control studies and, if applicable, for exposed and unexposed groups in cohort and cross-sectional studies.

**Note:** An Explanation and Elaboration article discusses each checklist item and gives methodological background and published examples of transparent reporting. The STROBE checklist is best used in conjunction with this article (freely available on the Web sites of PLoS Medicine at <http://www.plosmedicine.org/>, Annals of Internal Medicine at <http://www.annals.org/>, and Epidemiology at <http://www.epidem.com/>). Information on the STROBE Initiative is available at [www.strobe-statement.org](http://www.strobe-statement.org).
